# Supplementary material for: Quinone methide chemistry of prekinamycins: 13C- labeling, spectral global fitting and in vitro studies
Source: Royal Society of Chemistry journal article supplement (doi:10.1039/b903844b), 2009-01-01
Supplement: b903844b.pdf [file b903844b.pdf]

Supplementary Information for  
Quinone Methide Chemistry of Prekinamycins:  $^{13}\text{C}$ -labeling, Spectral Global Fitting and In Vitro  
Studies

*Omar Khmour and Edward B. Skibo\**

**Table of Contents:**

Page S3, General Experimental Methods

Page S4, H- NMR for Malonic Acid 50%  $^{13}\text{C}$

Page S5, Mass Spec for Malonic Acid 50%  $^{13}\text{C}$

Page S6, H- NMR for Carboxylic Acid der. of 8\*

Page S7,  $^{13}\text{C}$ -NMR for Carboxylic Acid der. of 8\*

Page S8, Mass Spec for Carboxylic Acid der. of 8\*

Page S9, H-NMR for Compound 8\*

Page S10,  $^{13}\text{C}$ -NMR for Compound 8\*

Page S11, Mass Spec for Compound 8\*

Page S12, H-NMR for Compound 10\*

Page S13,  $^{13}\text{C}$ -NMR for Compound 10\*

Page S14, Mass Spec for Compound 10\*

Page S15, H-NMR for Compound 11\*

Page S16,  $^{13}\text{C}$ -NMR for Compound 11\*

Page S17, Mass Spec for Compound 11\*

Page S18, H-NMR for Compound 12\*

Page S19,  $^{13}\text{C}$ -NMR for Compound 12\*

Page S20, Mass Spec for Compound 12\*

Page S21, H-NMR for Compound 1\*

Page S22,  $^{13}\text{C}$ -NMR for Compound 1\*

Page S23, Enriched  $^{13}\text{C}$ -NMR for Compound 1\*

Page S24, Mass Spec for Compound 1\*

Page S25, H-NMR for Compound 13\*

Page S26,  $^{13}\text{C}$ -NMR for Compound 13\*

Page S27, Mass Spec for Compound 13\*

Page S28, H-NMR for Compound 14\*

Page S29,  $^{13}\text{C}$ -NMR for Compound 14\*

Page S30, Mass Spec for Compound 14\*

Page S31, H-NMR for Compound 15\*

Page S32,  $^{13}\text{C}$ -NMR for Compound 15\*

Page S33, Mass Spec for Compound 15\*

Page S34, H-NMR for Compound 16

Page S35, H-NMR for Compound 17\*

Page S36,  $^{13}\text{C}$ -NMR for Compound 17\*

Page S37, Mass Spec for Compound 17\*

Page S38, H-NMR for Compound 18\*

Page S39,  $^{13}\text{C}$ -NMR for Compound 18\*

Page S40, Mass Spec for Compound 18\*

Page S41, H-NMR for Compound 19\*

Page S42,  $^{13}\text{C}$ -NMR for Compound 19\*

Page S43, H-NMR for Compound 2\*

Page S44,  $^{13}\text{C}$ -NMR for Compound 2\*

Page S45, Mass Spec for Compound 2\*

Page S46, H-NMR for Compound 3\*

Page S47,  $^{13}\text{C}$ -NMR for Compound 3\*

Page S48,  $^{13}\text{C}$ -NMR for Compound 3\*

Page S49, Mass Spec for Compound 3\*

## Table of Contents (Continued)

|                                               |                                                                                         |
|-----------------------------------------------|-----------------------------------------------------------------------------------------|
| Page S50, Mass Spec for Compound 3*           | Page S73, H-NMR for Compound 25                                                         |
| Page S51, <sup>13</sup> C-NMR for Compound 21 | Page S74, H-NMR for Compound 25                                                         |
| Page S52, Mass Spec for Compound 21           | Page S75, Mass Spec for Compound 25                                                     |
| Page S53, H-NMR for Compound 22               | Page S76, H-NMR for Compound 28*                                                        |
| Page S54, Mass Spec for Compound 22           | Page S77, H-NMR for Compound 28*                                                        |
| Page S55, H-NMR for Compound 23               | Page S78, <sup>13</sup> C-NMR for Compound 28                                           |
| Page S56, <sup>13</sup> C-NMR for Compound 23 | Page S79, Mass Spec for Compound 28*                                                    |
| Page S57, Mass Spec for Compound 23           | Page S80, Mass Spec for Compound 28                                                     |
| Page S58, H-NMR for Compound 4                | Page S81, Mass Spec for Quinone Methide 26                                              |
| Page S59, H-NMR for Compound 4                | Page S82, Mass Spec for Compound 29*                                                    |
| Page S60, Mass Spec for Compound 4            | Page S83, Mass Spec for Compound 29                                                     |
| Page S61, H-NMR for Compound 5                | Page S84, Mass Spec for Compound 27*                                                    |
| Page S62, Mass Spec for Compound 5            | Page S85, Mass Spec for Compound 27                                                     |
| Page S63, H-NMR for Compound 6*               | Page S86, H-NMR for Compound 11* obtained from 1*                                       |
| Page S64, <sup>13</sup> C-NMR for Compound 6* | Page S87, Mass Spec for Compound 11* obtained from 1*                                   |
| Page S65, Mass Spec for Compound 6*           | Page S88, H-NMR for Compound 23* obtained from 1*                                       |
| Page S66, Mass Spec for Compound 6            | Page S89, Mass Spec for Compound 23* obtained from 1*                                   |
| Page S67, H-NMR for Compound 24               | Page S90, Mass Spec for Compound 30*                                                    |
| Page S68, <sup>13</sup> C-NMR for Compound 24 | Pages S91-103 Optimized geometries as Cartesian Coordinates<br>and energies in Hartrees |
| Page S69, Mass Spec for Compound 24*          |                                                                                         |
| Page S70, Mass Spec for Compound 24           |                                                                                         |
| Page S71, Mass Spec for byproduct of 24       |                                                                                         |
| Page S72, H-NMR for byproduct of 24           |                                                                                         |

## General Experimental Methods

All analytically pure compounds were dried under high vacuum in a drying pistol over refluxing methanol. Elemental analyses (CHN) were obtained for intermediates and final products. Melting points and decomposition points were determined for all intermediates and final products. All TLCs were performed on silica gel plates using a variety of solvent systems and a fluorescent indicator for visualization. IR spectra were taken as KBr pellets and only the strongest absorbances were reported. <sup>1</sup>H NMR spectra were obtained with a 300 or 500 MHz spectrometer. All chemical shifts are reported relative to TMS. High-resolution mass spectra were obtained using MALDI or EI mode.

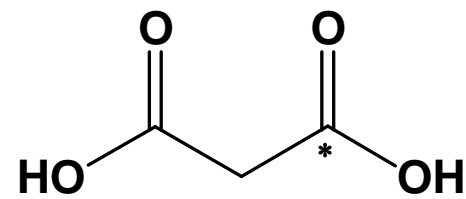

Malonic Acid

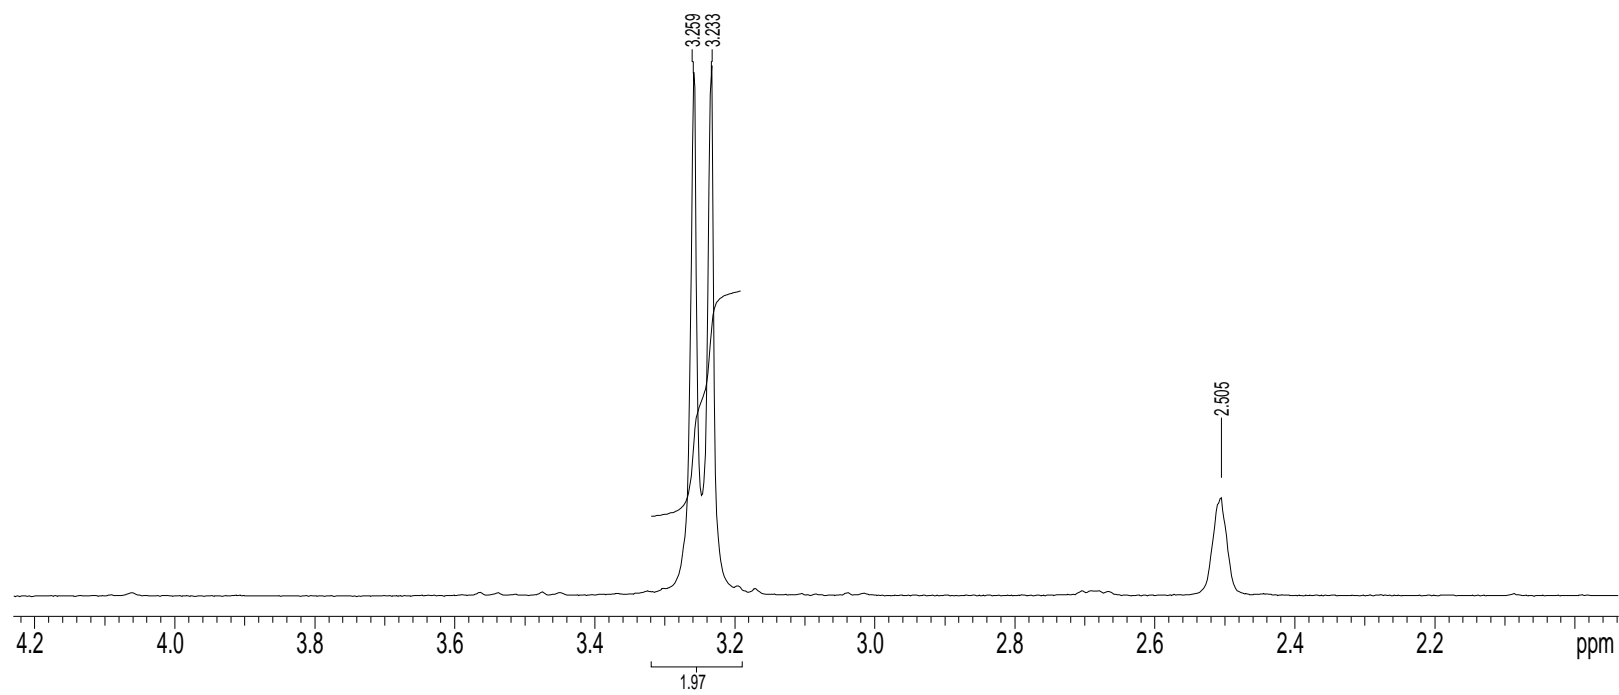

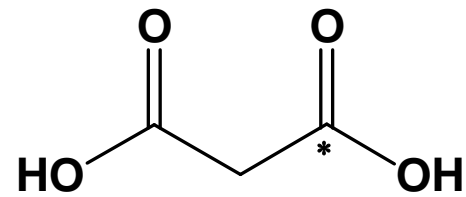

Malonic Acid  $^{13}\text{C}$ -NMR

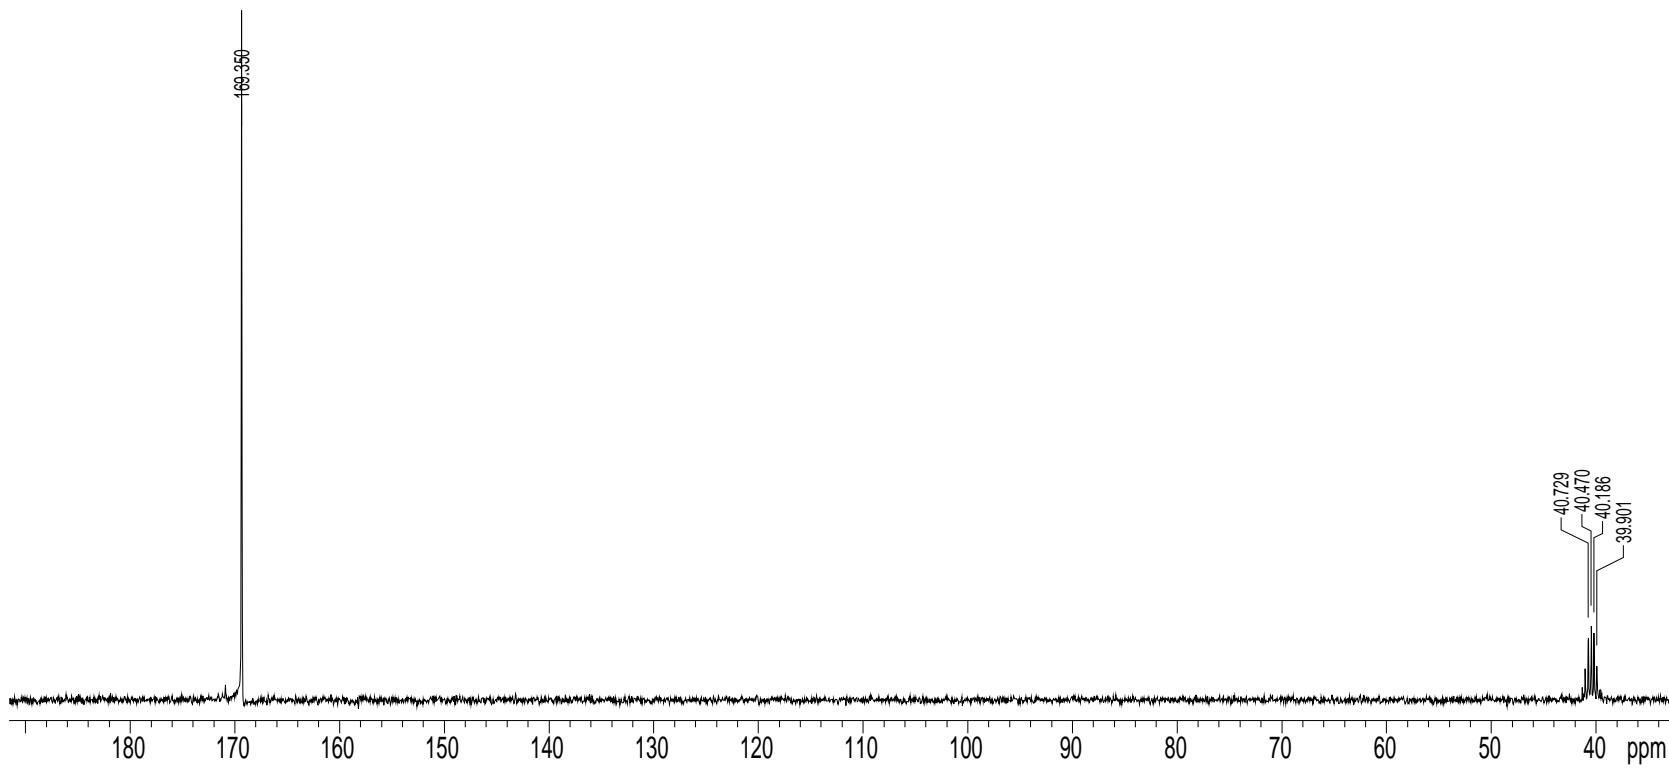

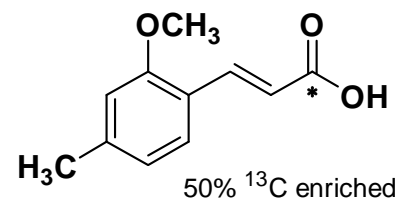

H-NMR of the Carboxylic Acid Derivative of 8\*

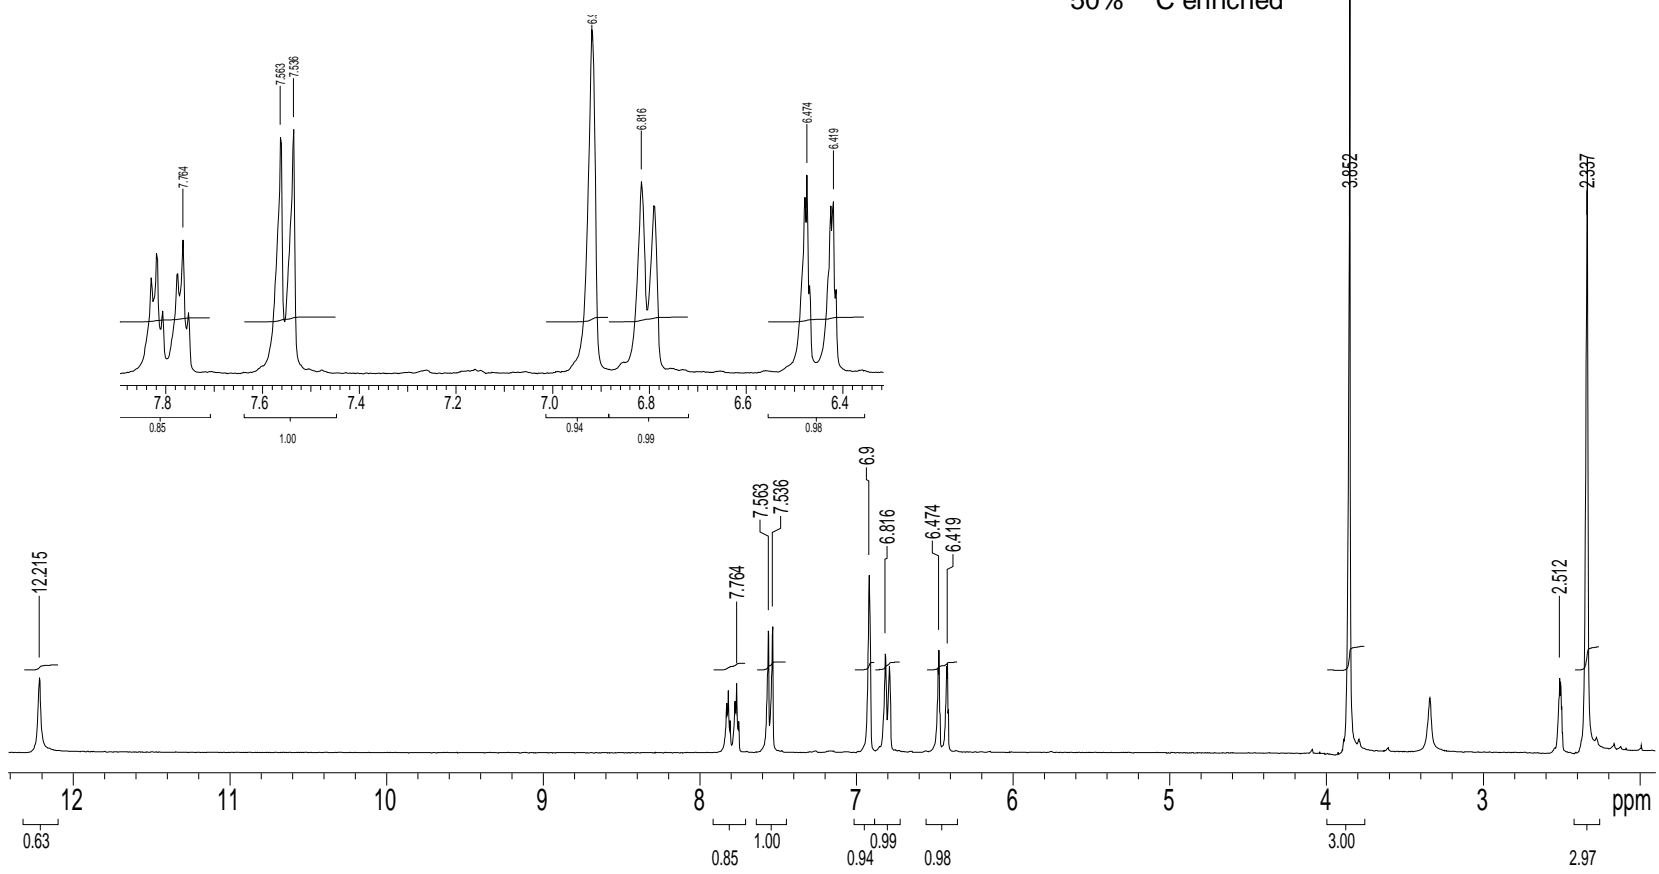

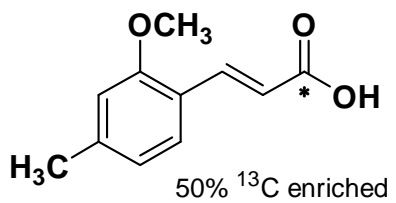

$^{13}\text{C}$ -NMR of the  
Carboxylic Acid  
Derivative of 8\*

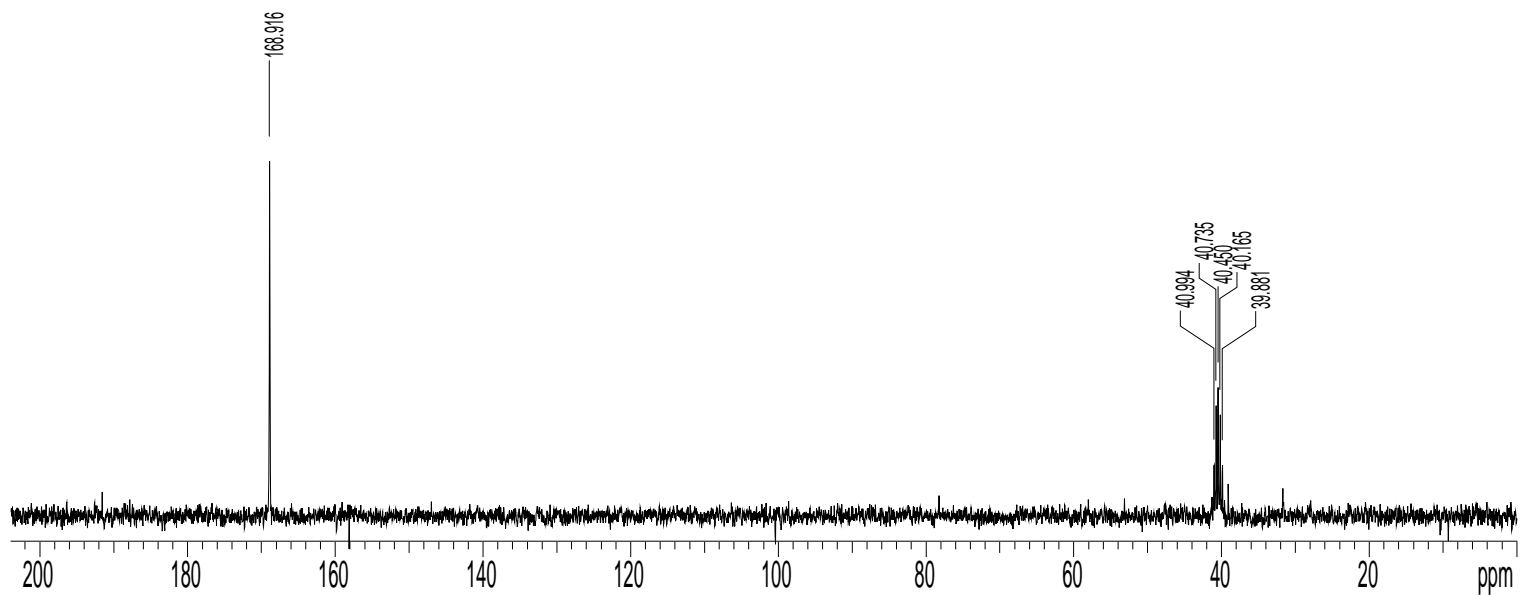

File:53929 Ident:18\_20-1\_11 Win 100PPM Acq:18-MAY-2006 10:07:48 +4:12 cal:53929  
AutoSpecEtoFPD EI+ Magnet BpM:193 BpI:479872 TIC:5335825 Flags:ACC  
File Text:Khodour/Skibo ; omk-k2 ; HREI

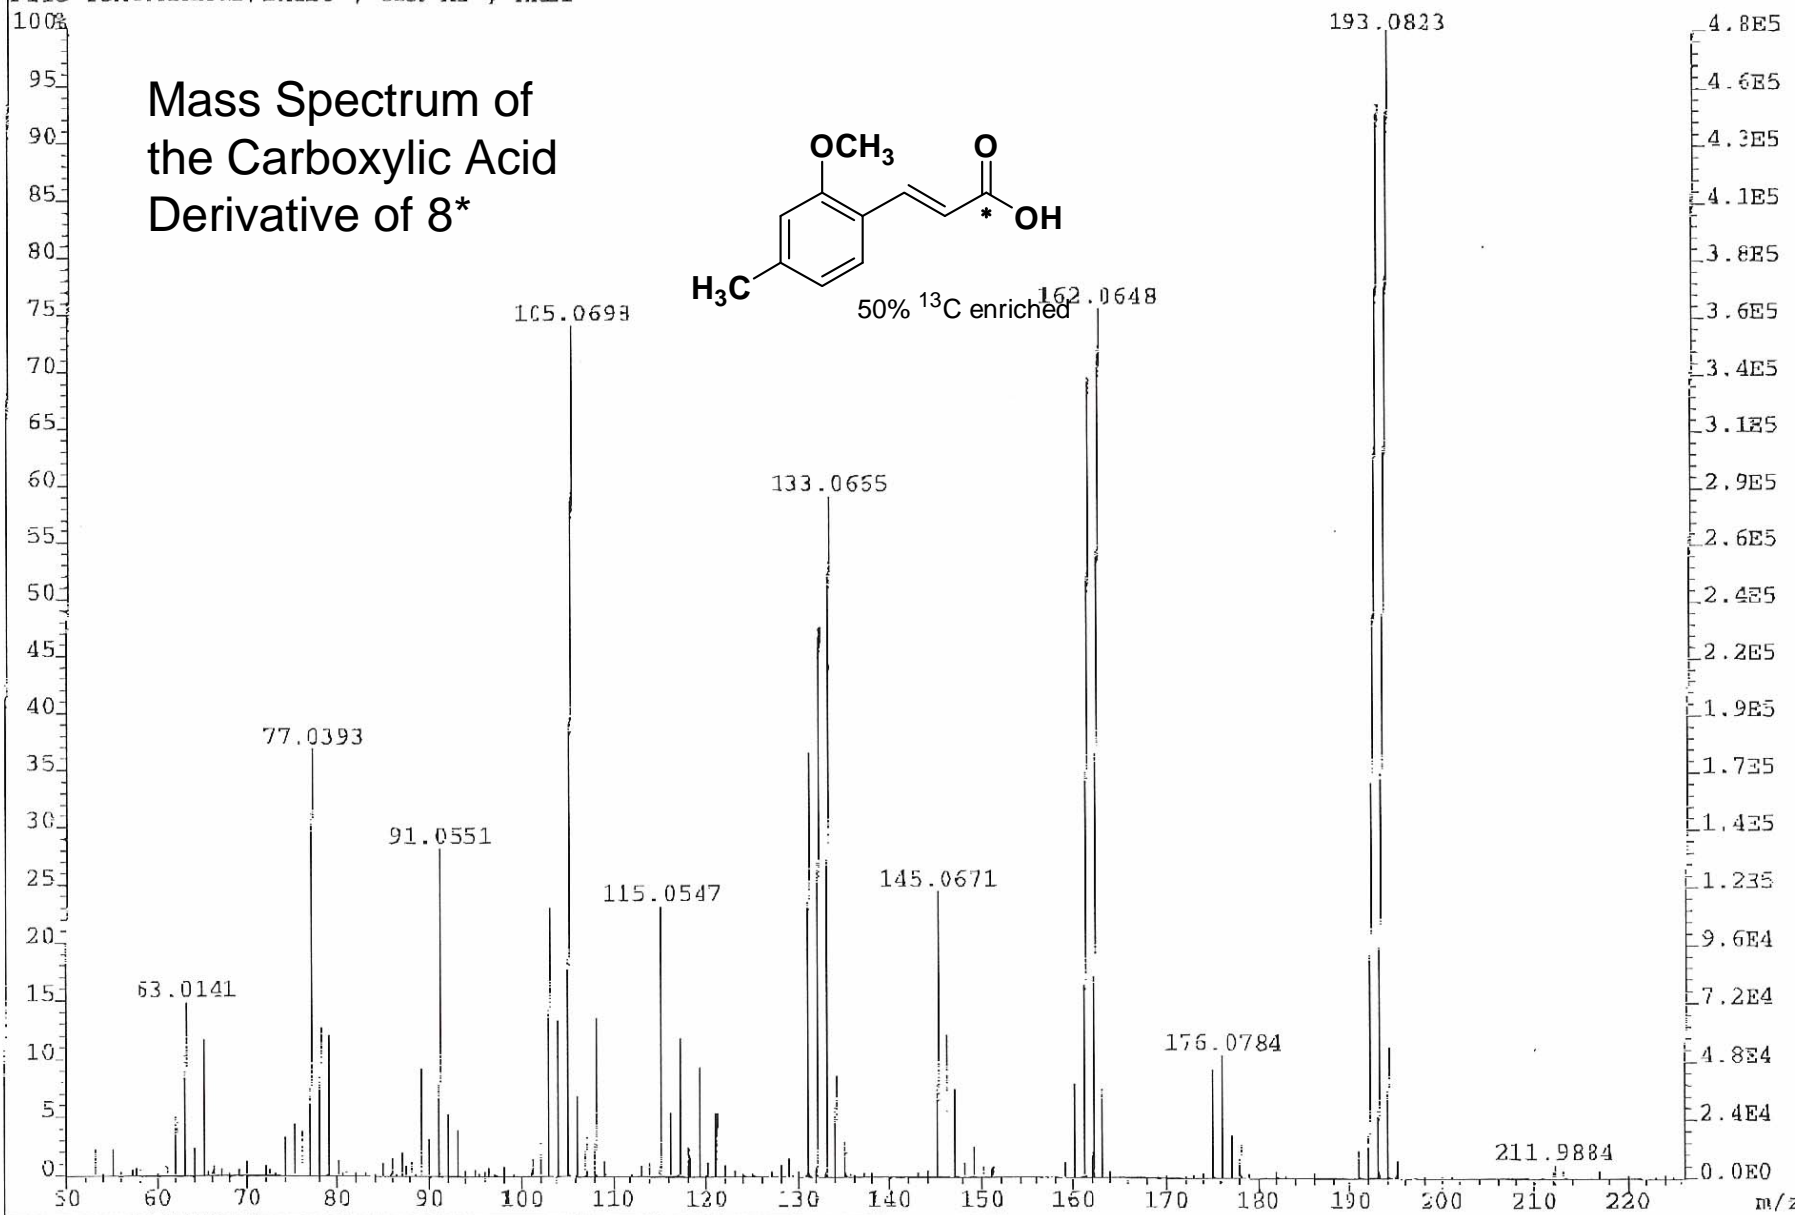



# H-NMR of 8\*

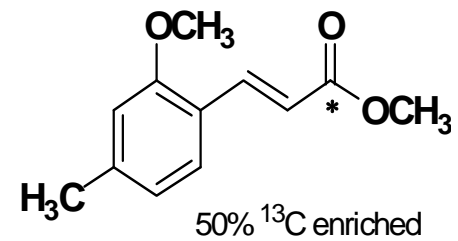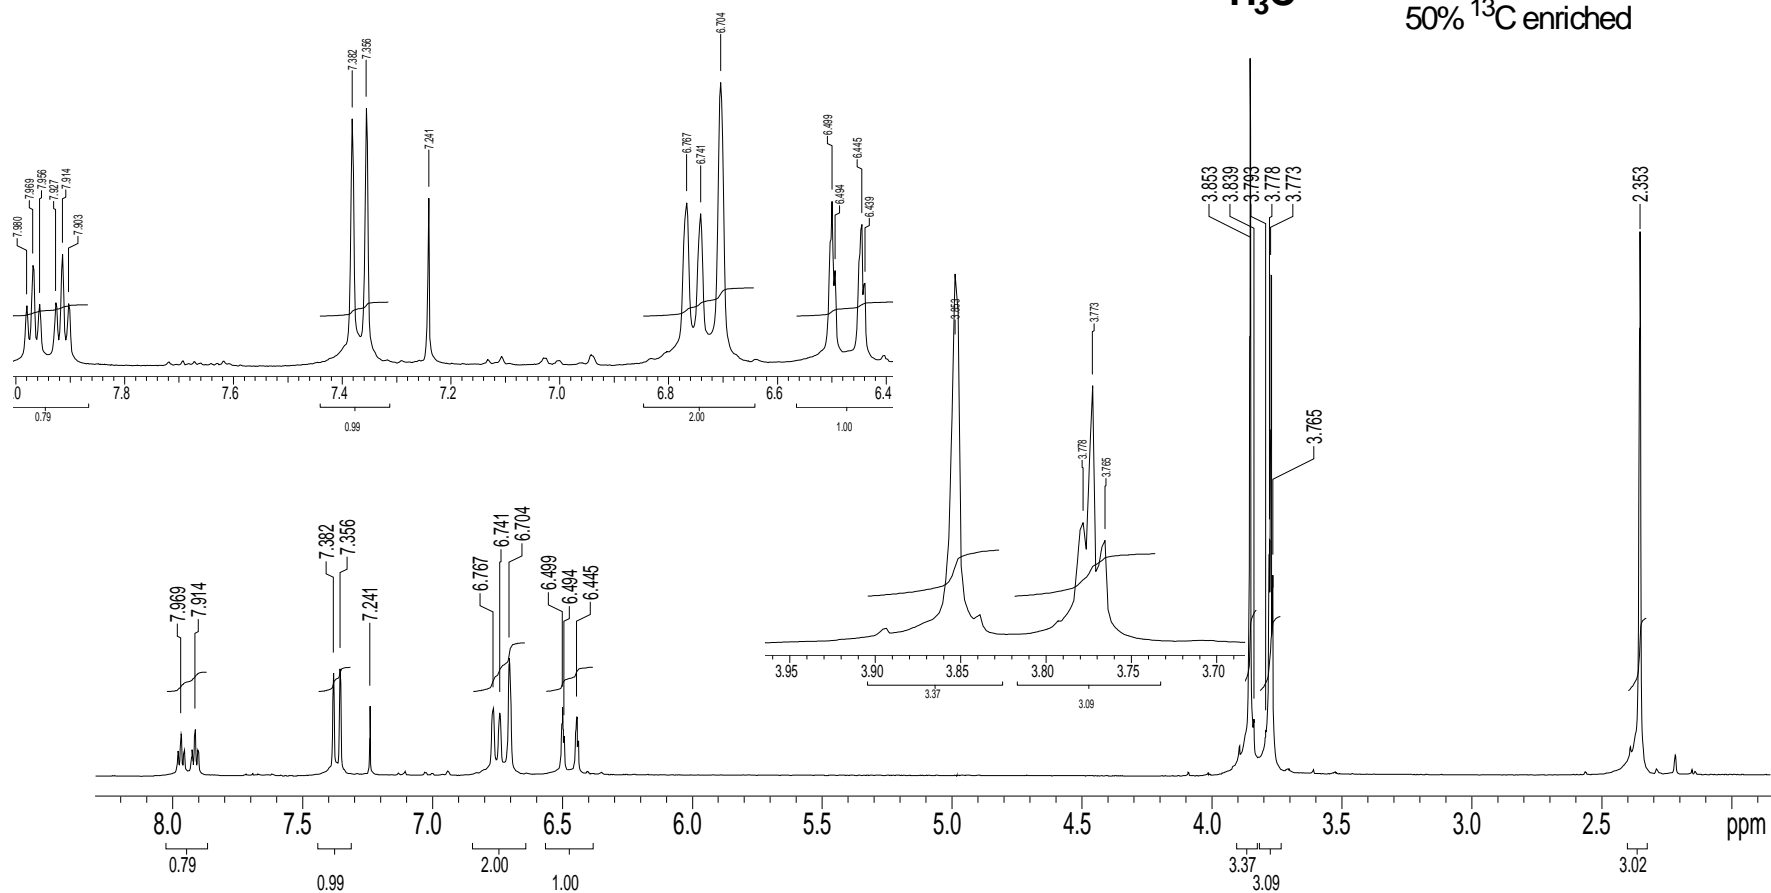

$^{13}\text{C}$ -NMR of 8\*

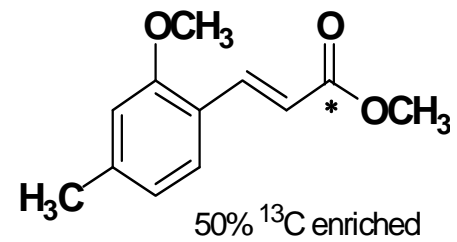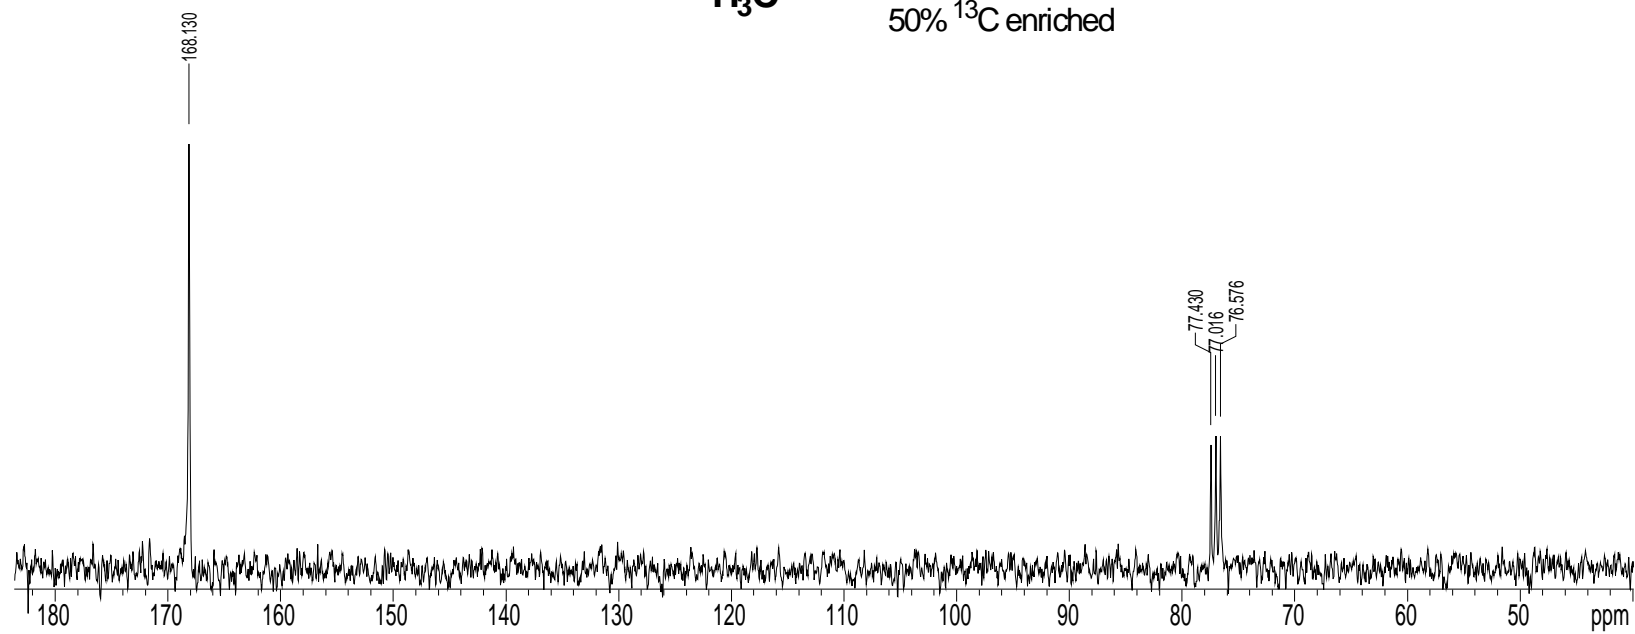

File:53930 Ident:17\_26-1\_11 Win 100PPM Acq:18-MAY-2006 10:28:43 #4:43 Cal:53930  
AutoSpecTOFFED EI+ Magnet BpM:176 BpI:2951332 TIC:19074076 Flags:ACC  
File Text:Khdcnr/Skibo ; omk-k3 ; HREI

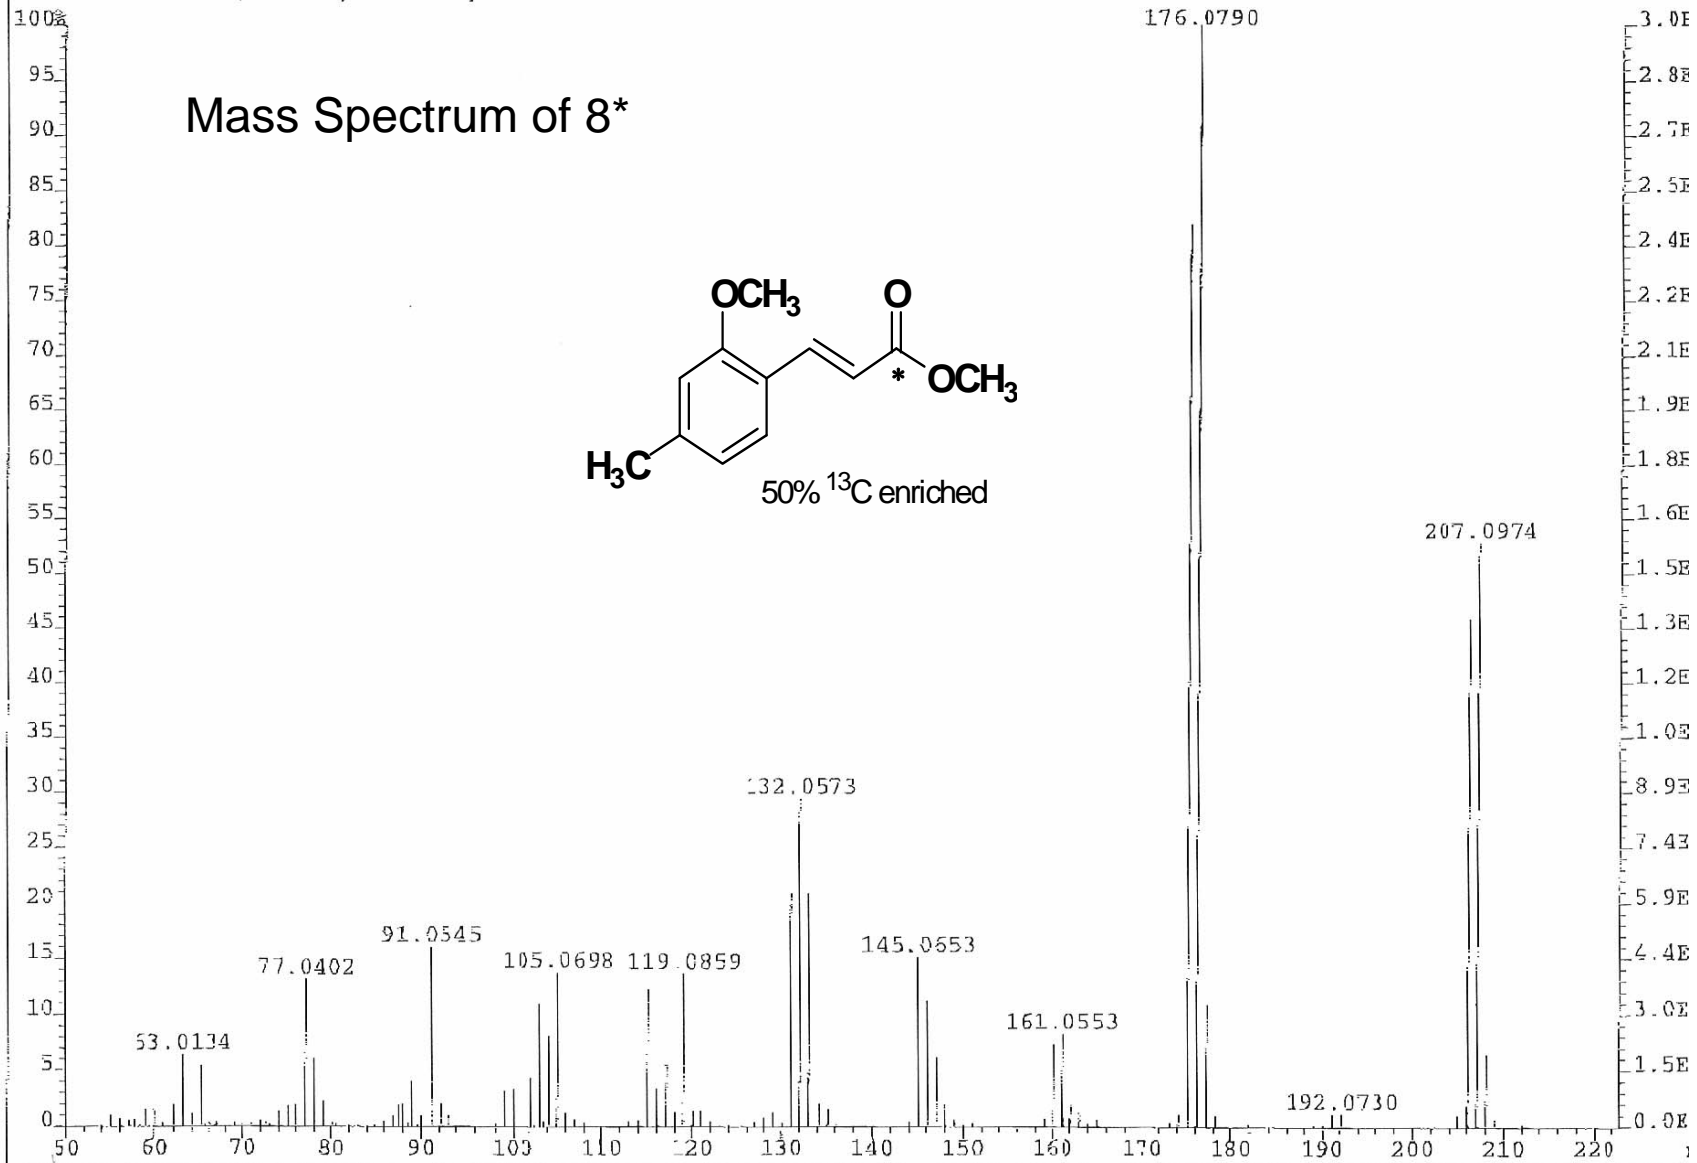

# H-NMR of 10\*

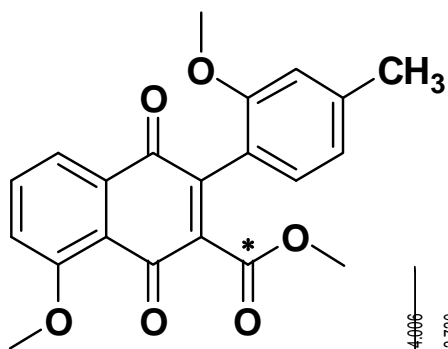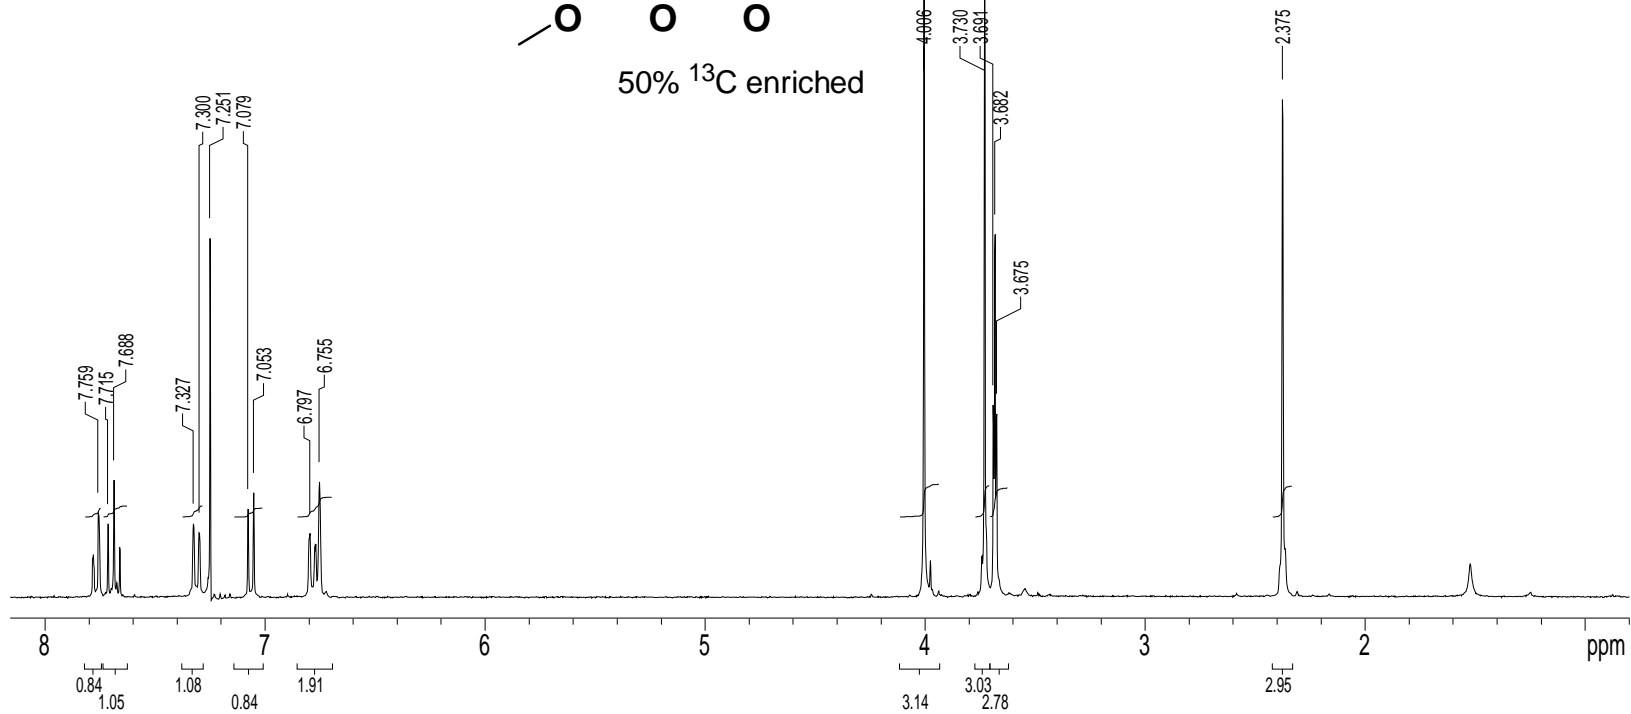

$^{13}\text{C}$ -NMR of **10\***

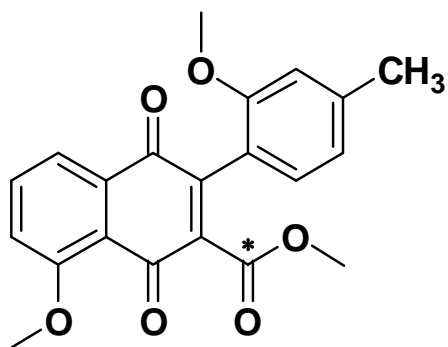

50%  $^{13}\text{C}$  enriched

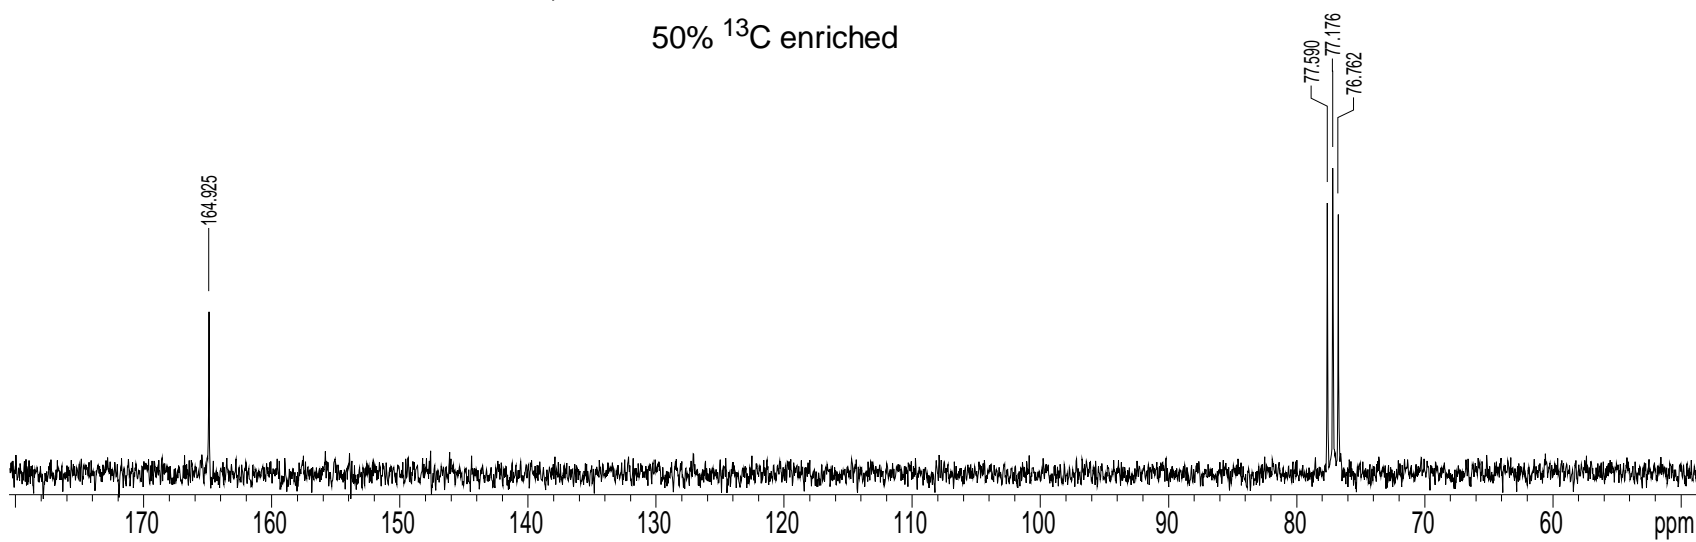

File:53931A Ident:45\_55-1\_11 Win 10CPM Acq:18-MAY-2006 11:29:35 +10:41 Cal:53931A  
AutoSpecBTOFFPD EI+ Magnet BpM:367 BpI:211048 TIC:4066035 Flags:ACC  
File Text:Khdour/Skibo ; omk-k4 ; HFEI

# Mass Spectrum of 10\*

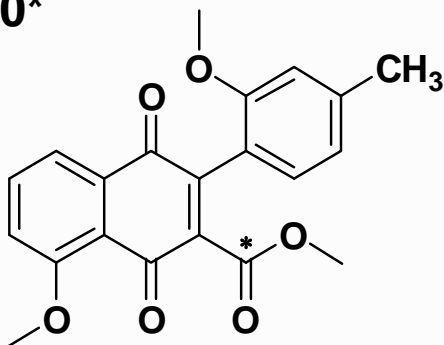

50% <sup>13</sup>C enriched

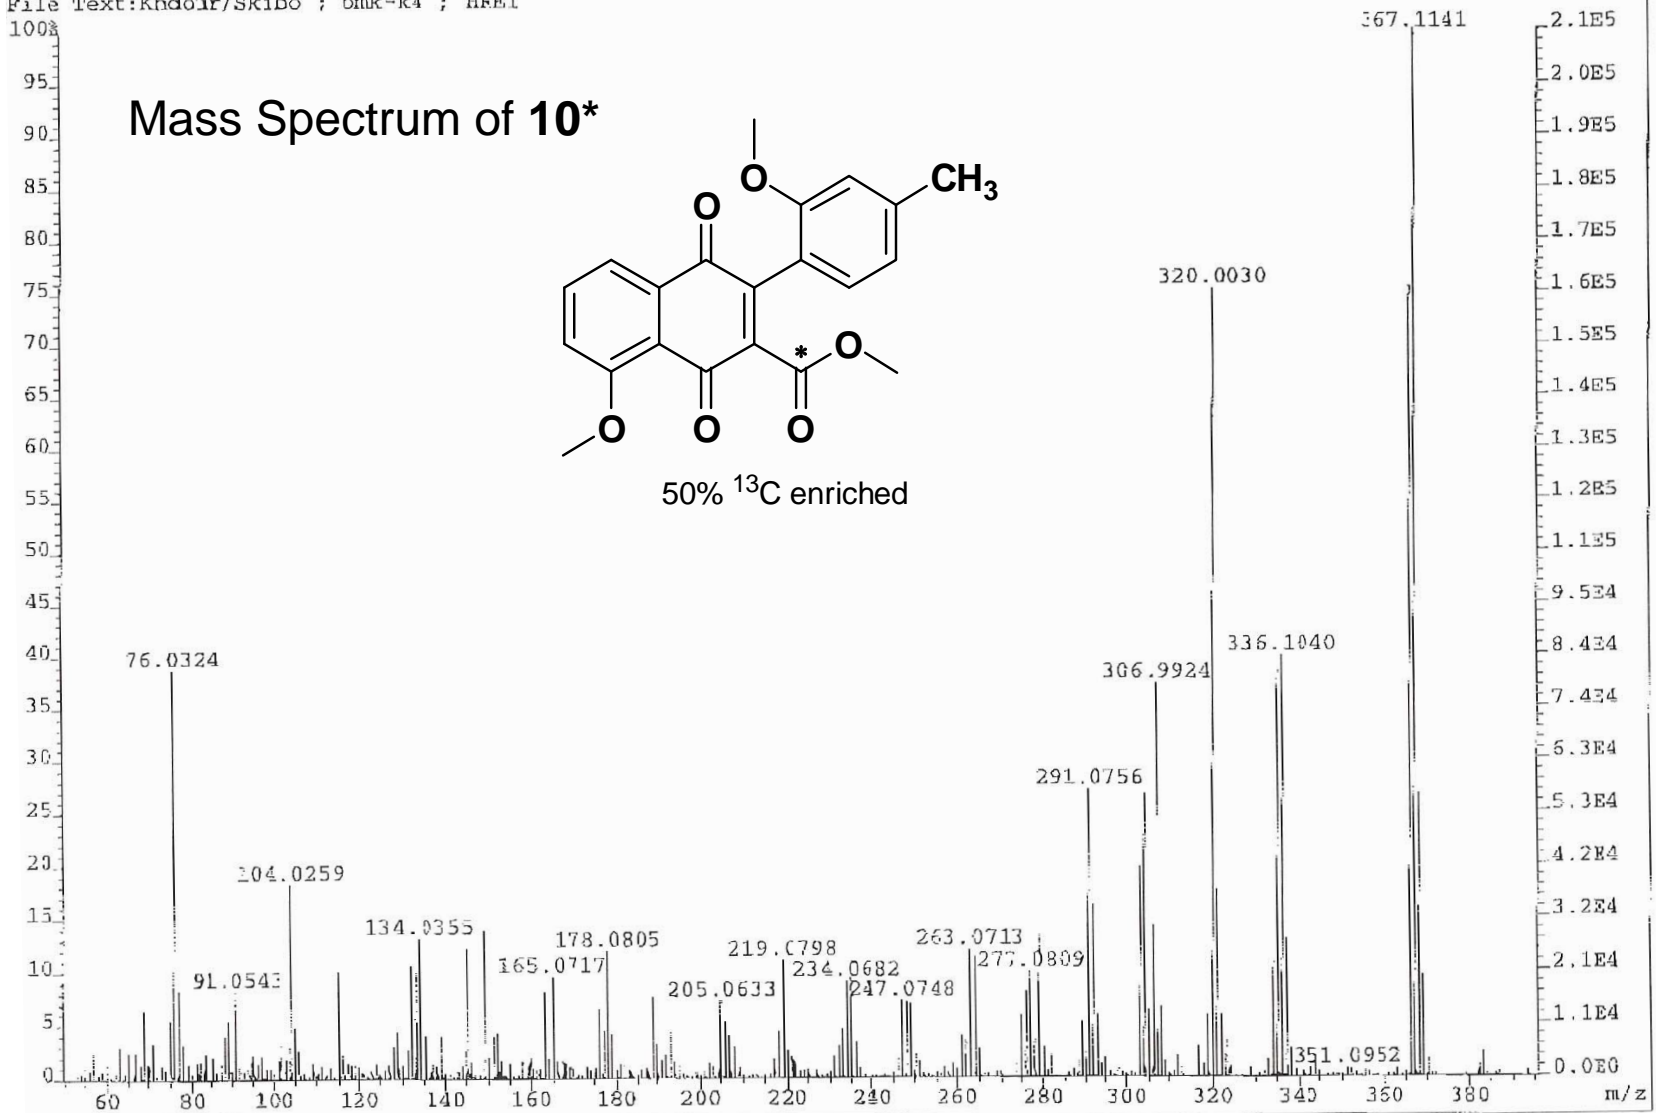

# H-NMR of 11\*

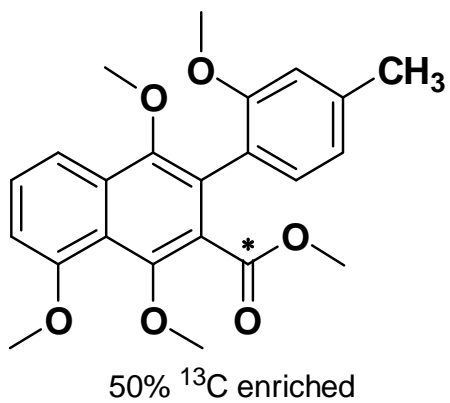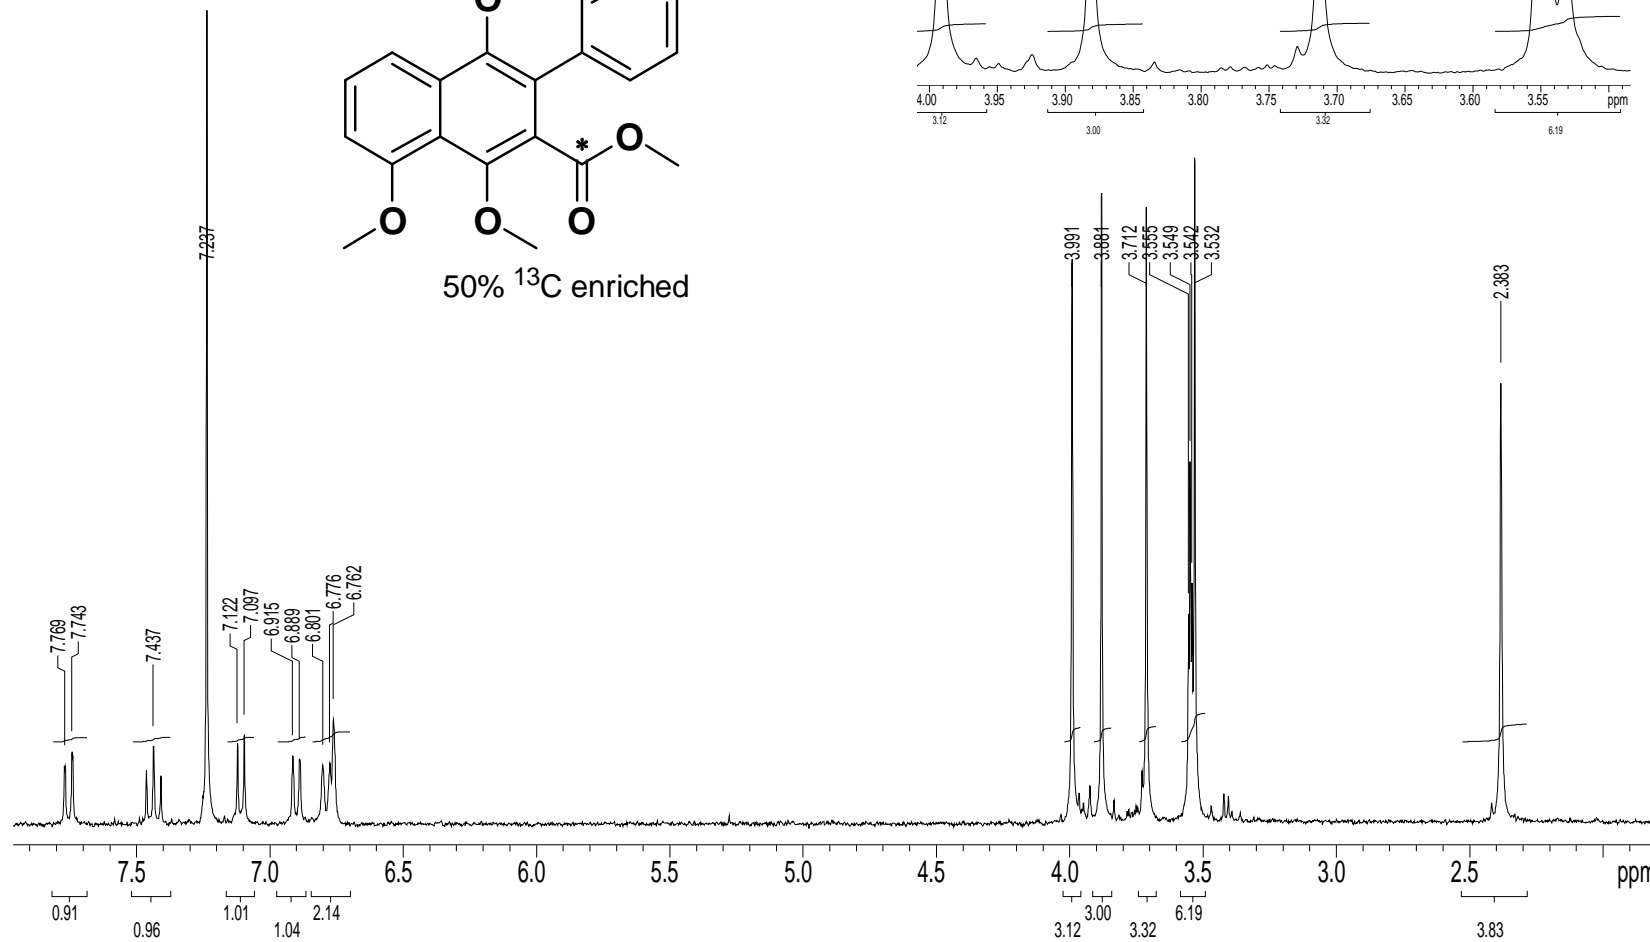

# $^{13}\text{C}$ -NMR of **11\***

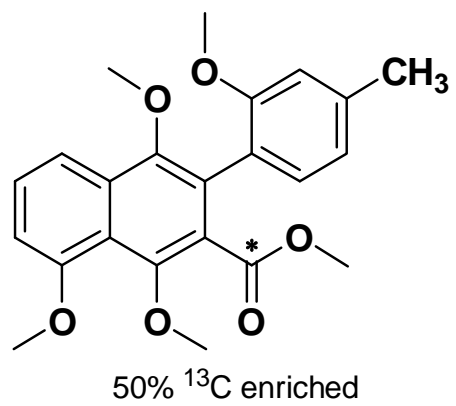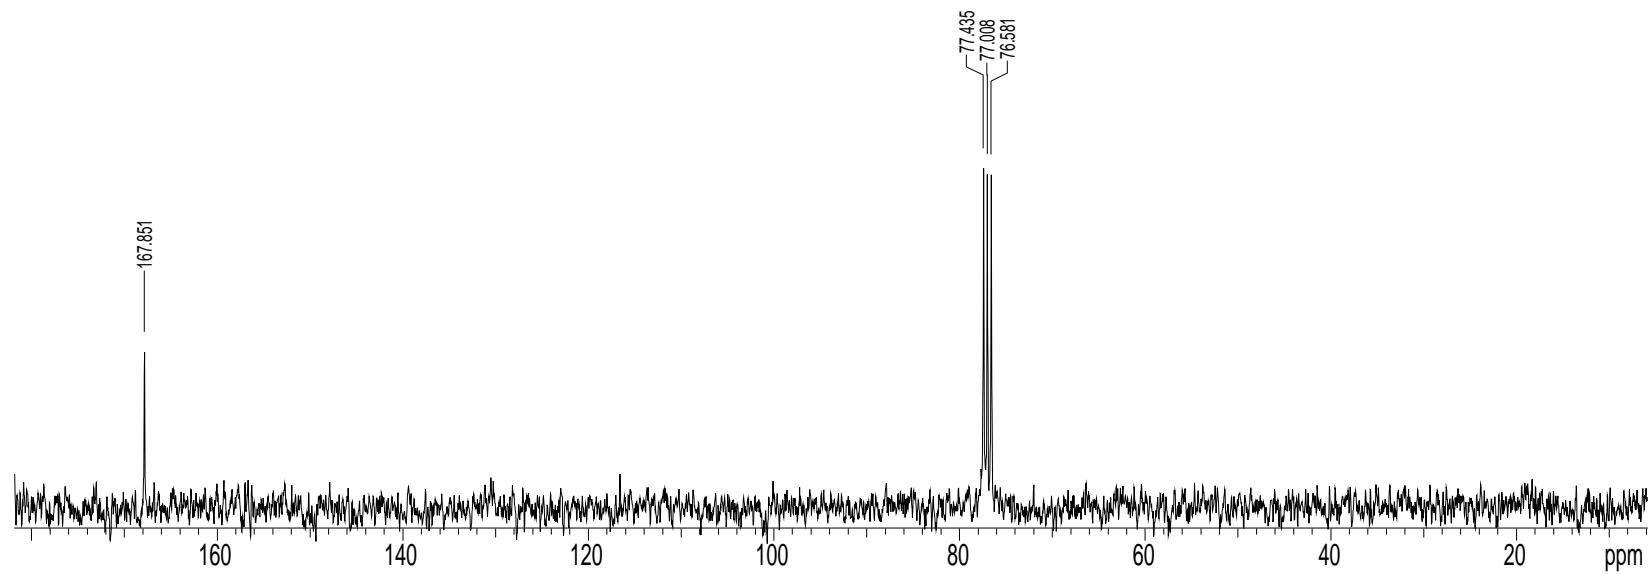



File:53932 Ident:21\_26-1\_10 Win 100PM Acq:18-MAY-2006 11:58:49 +5:08 Cal:53932  
AutoSpecETOFED EI+ Magnet BpM:397 BpI:373845 TIC:3070513 Flags:ACC  
File Text:Khdour/Skibo ; omk-k5 ; HREI

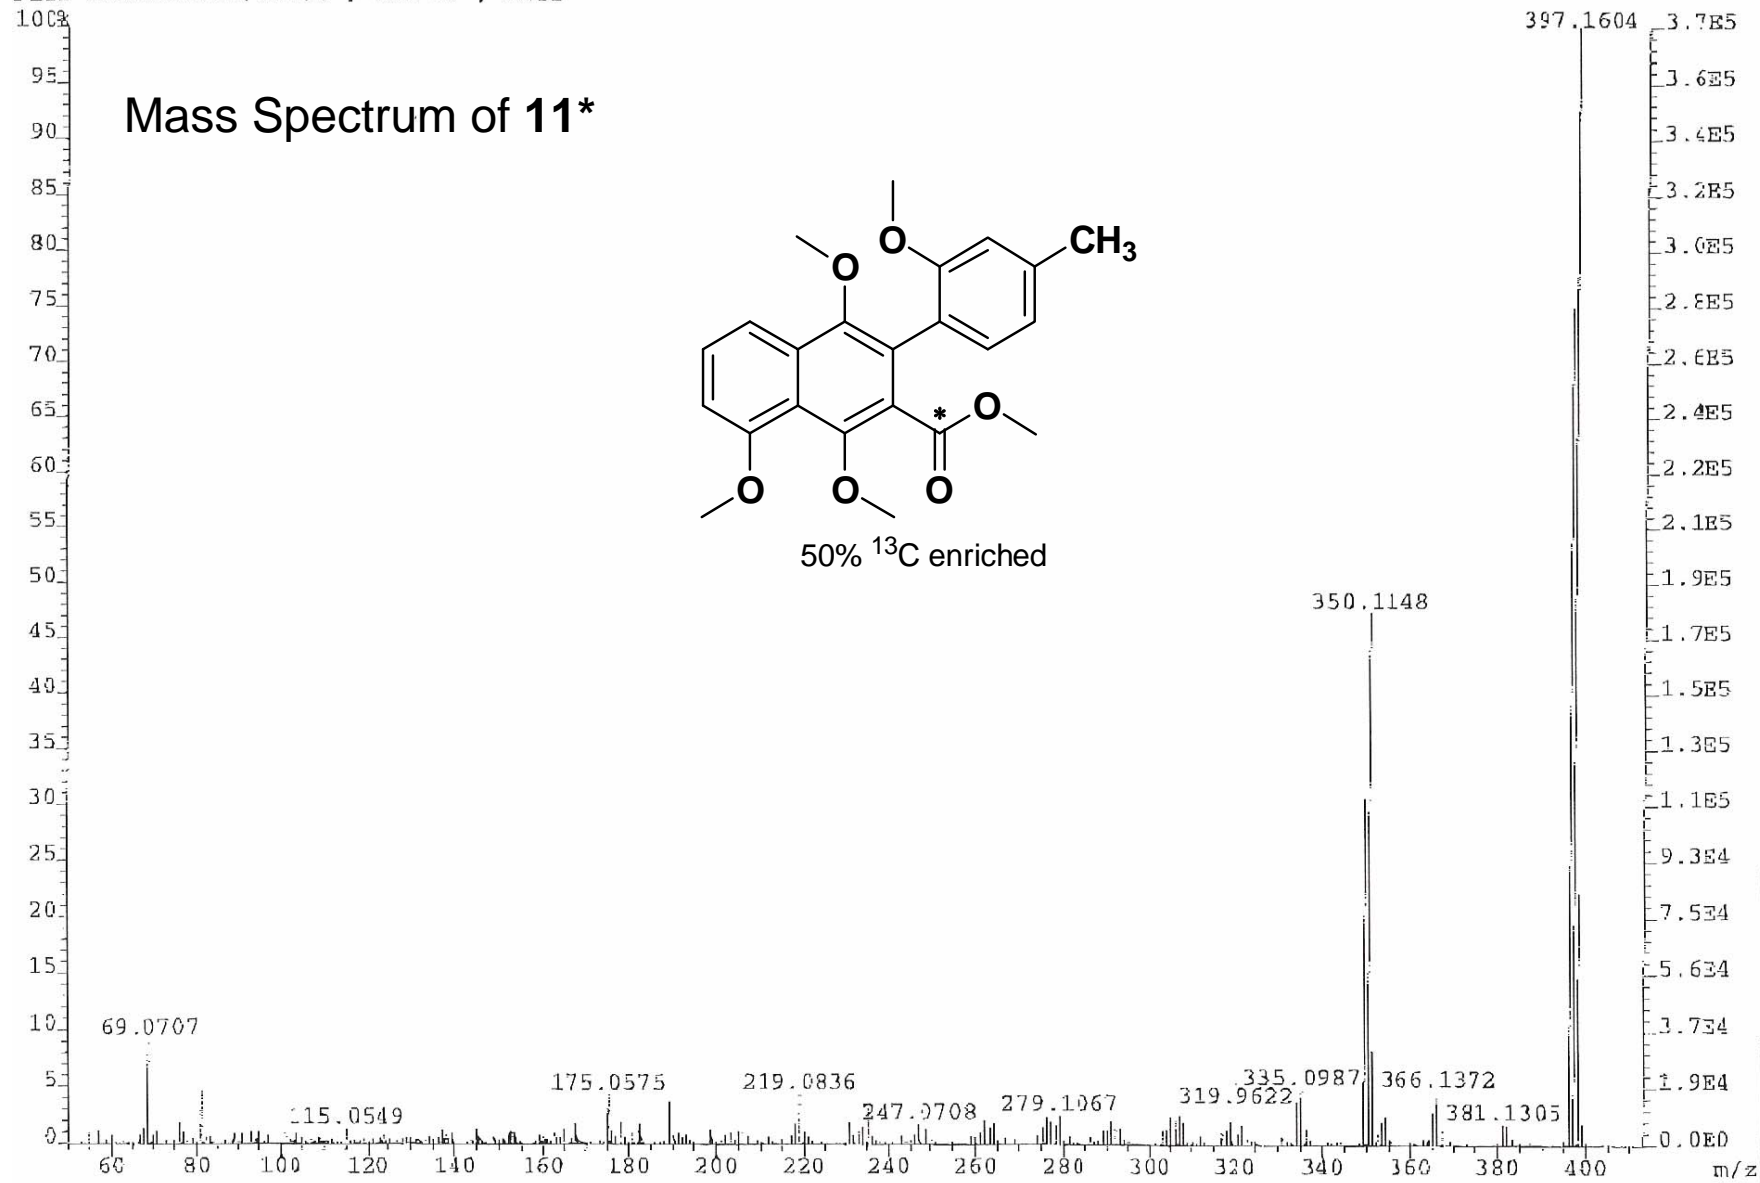

# H-NMR of 12\*

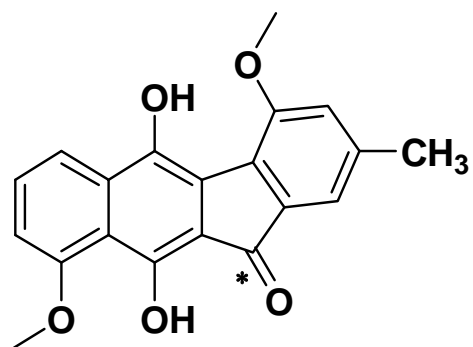

50% <sup>13</sup>C enriched

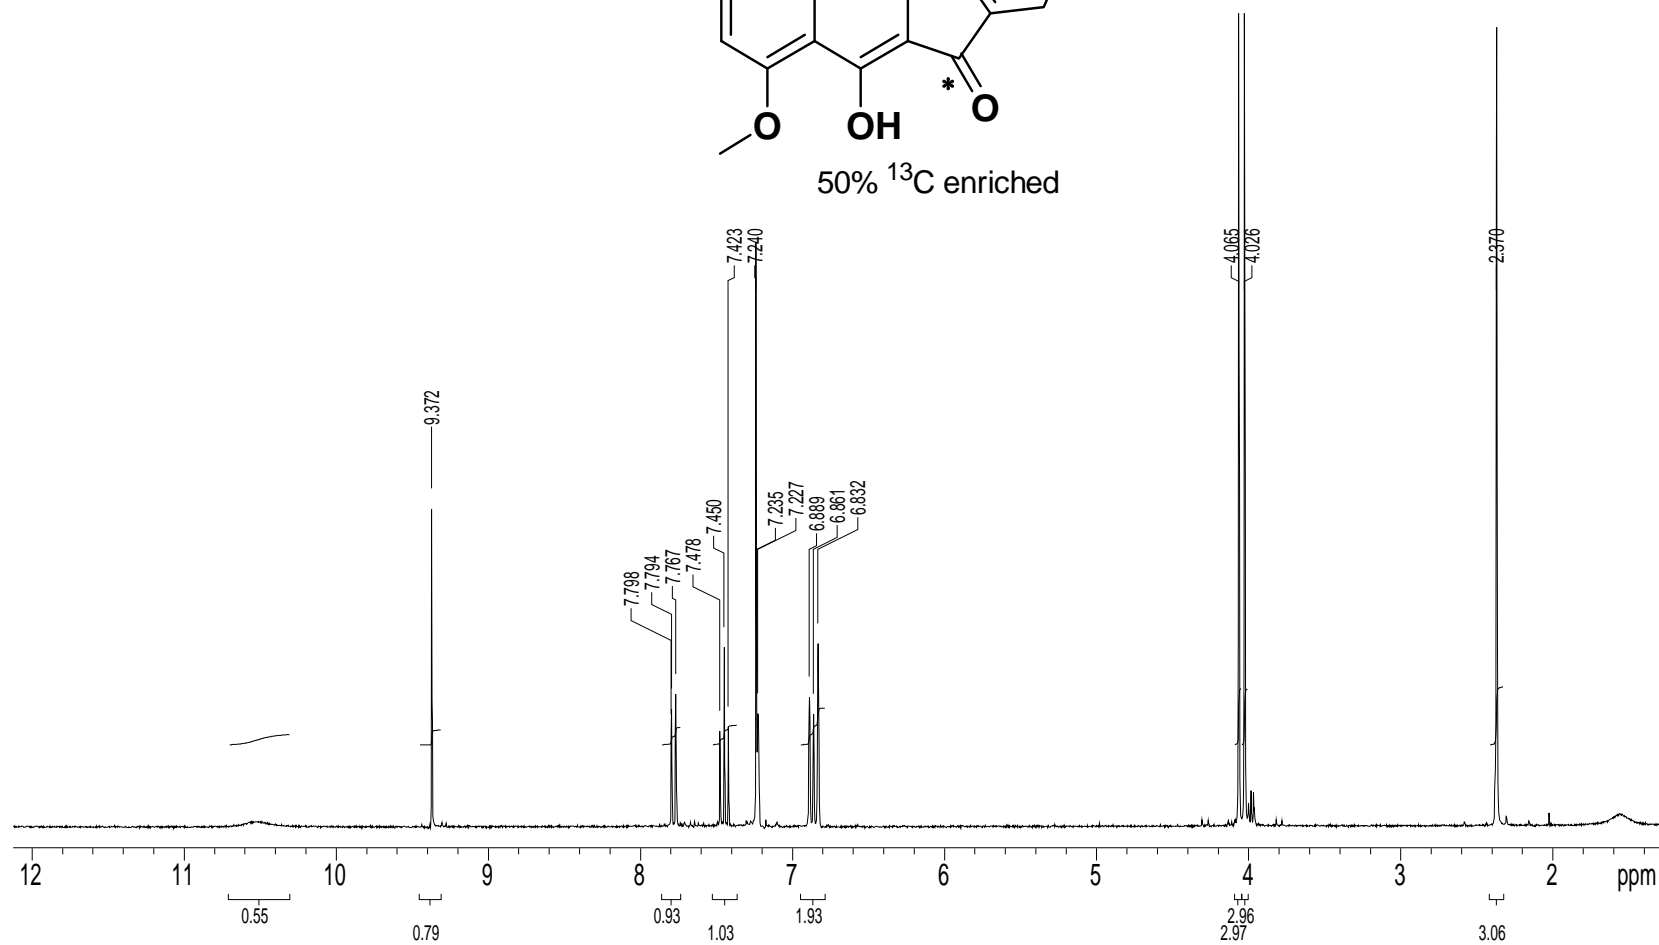

# $^{13}\text{C}$ -NMR of **12\***

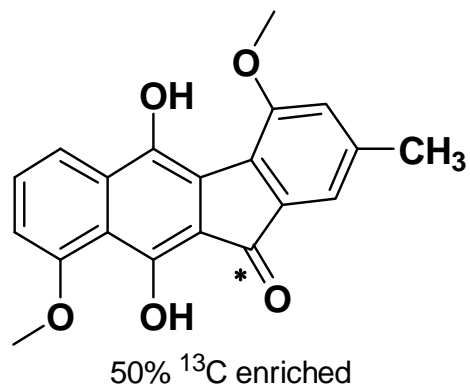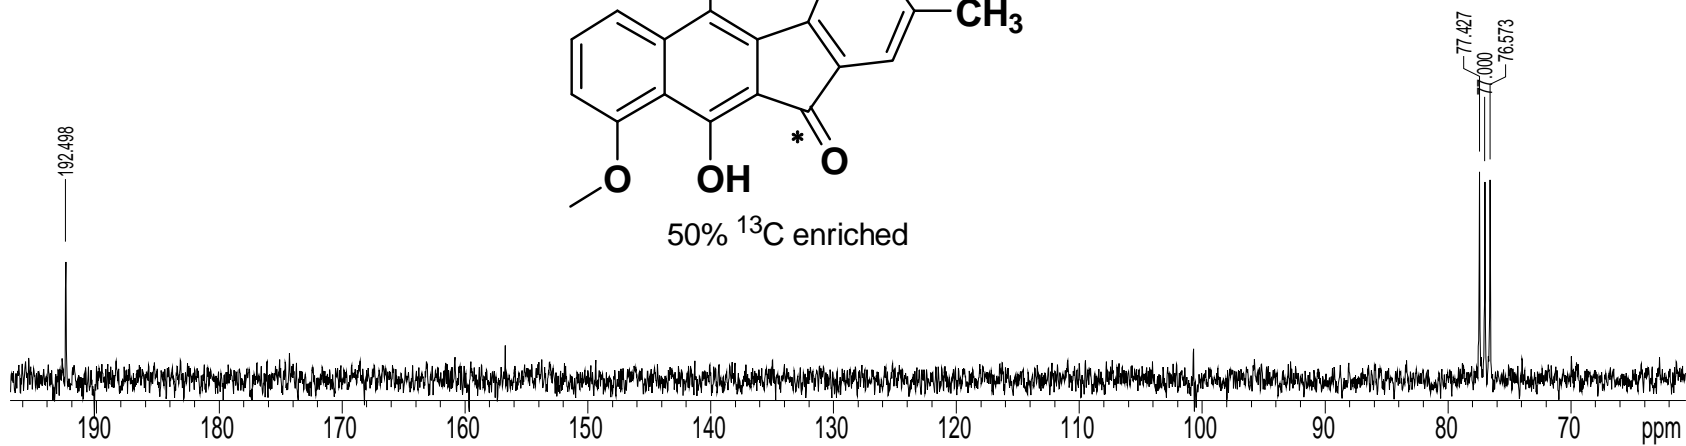

File: 53933A Ident: 30\_40-1\_10 Win 100PPM Acq: 18-MAY-2006 13:31:11 +7:33 Cal: 53933A  
AutoSpec: TOFPPD EI+ Magnet BpM: 337 BpI: 82207 TIC: 1144341 Flags: ACC  
File Text: Khdour/Skibo ; omk-k5 ; HREI

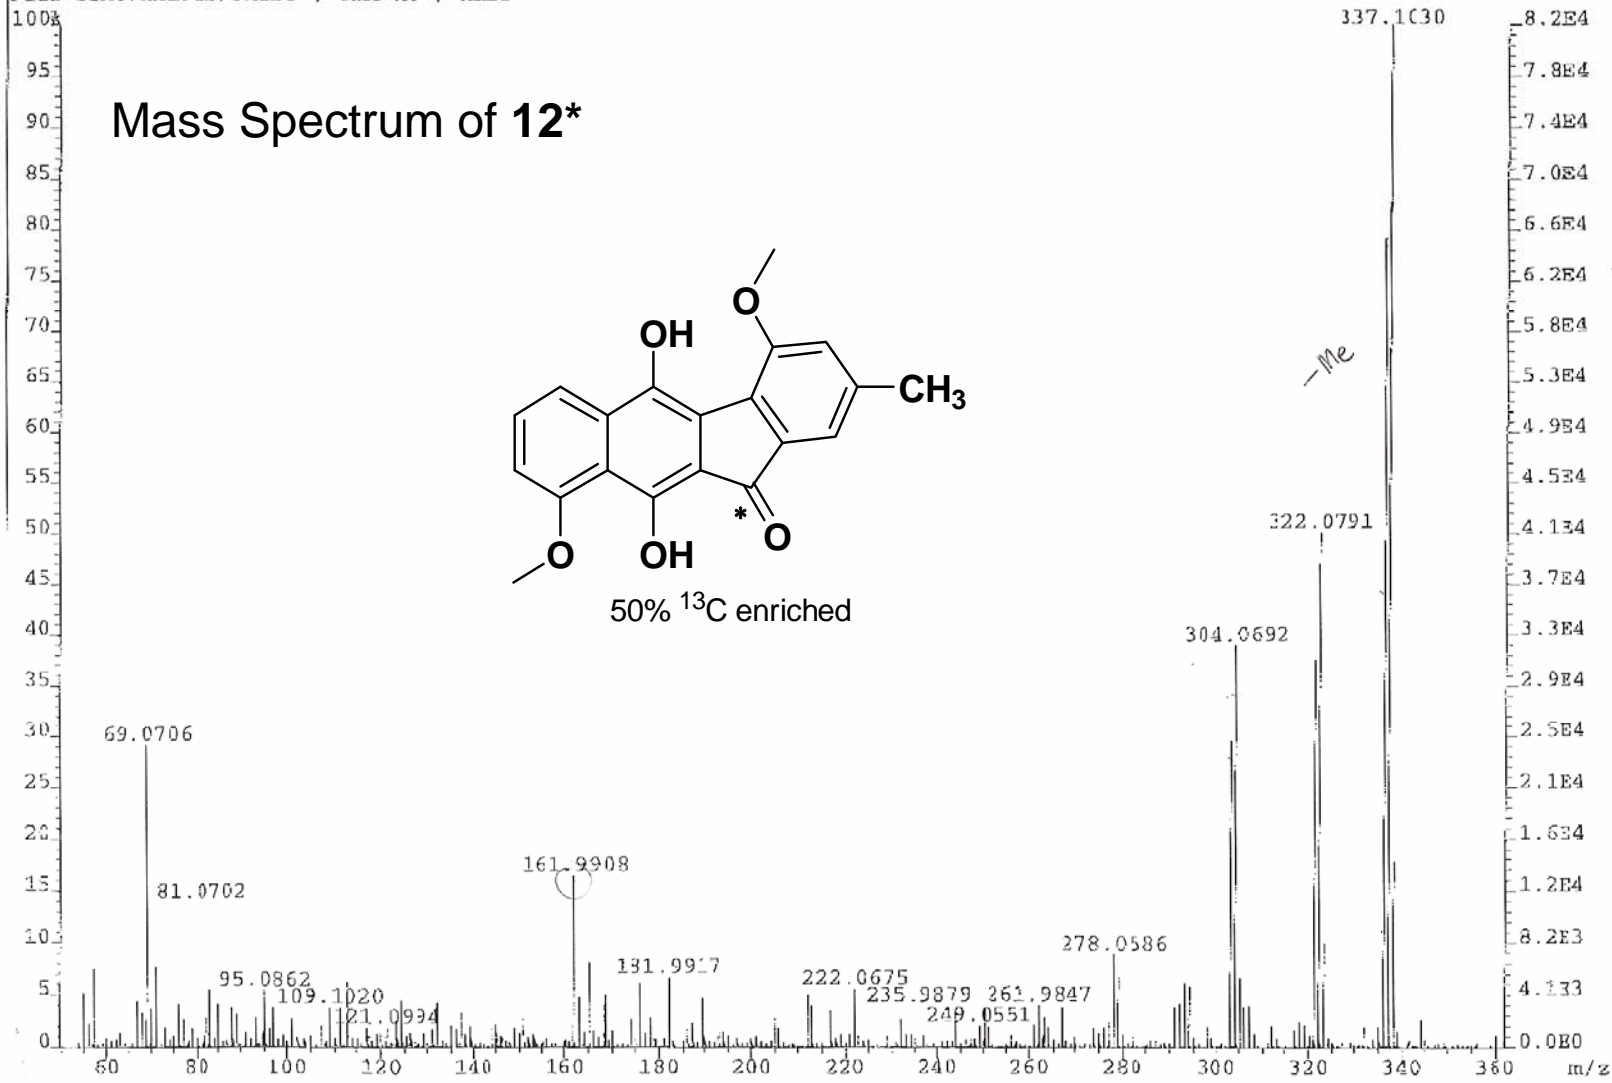

# H-NMR of 1\*

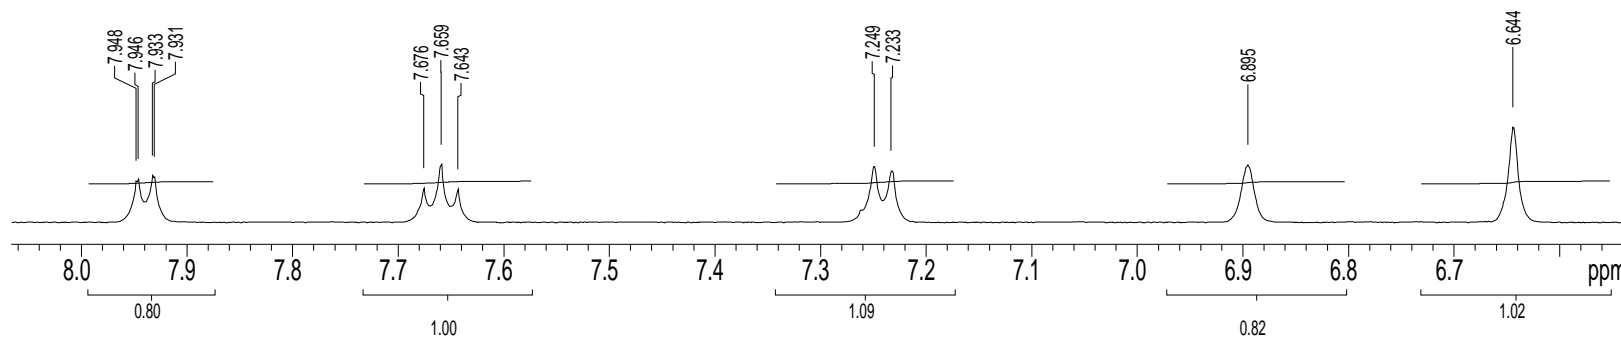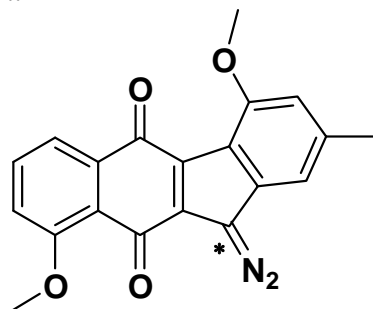

50% <sup>13</sup>C enriched

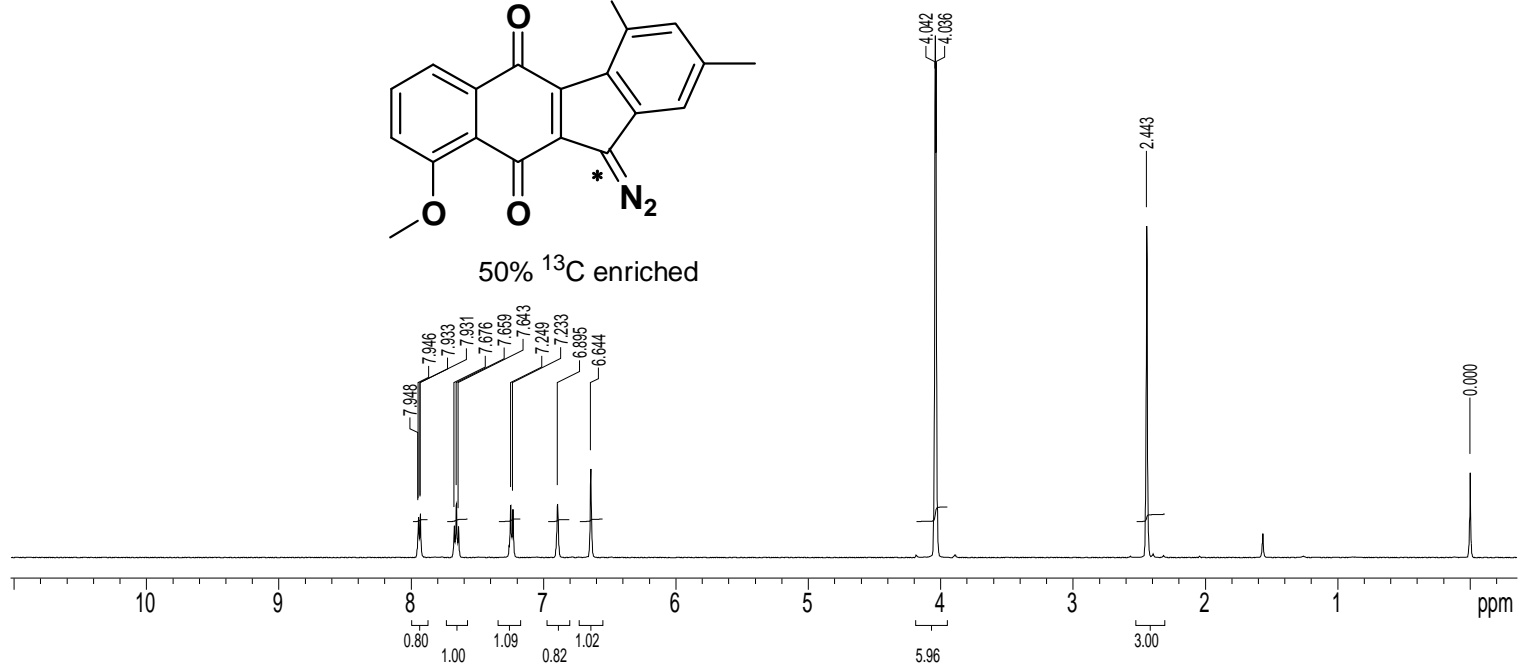

# <sup>13</sup>C-NMR of 1\*

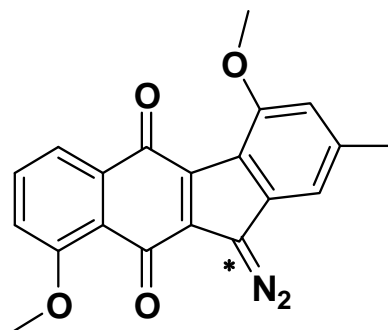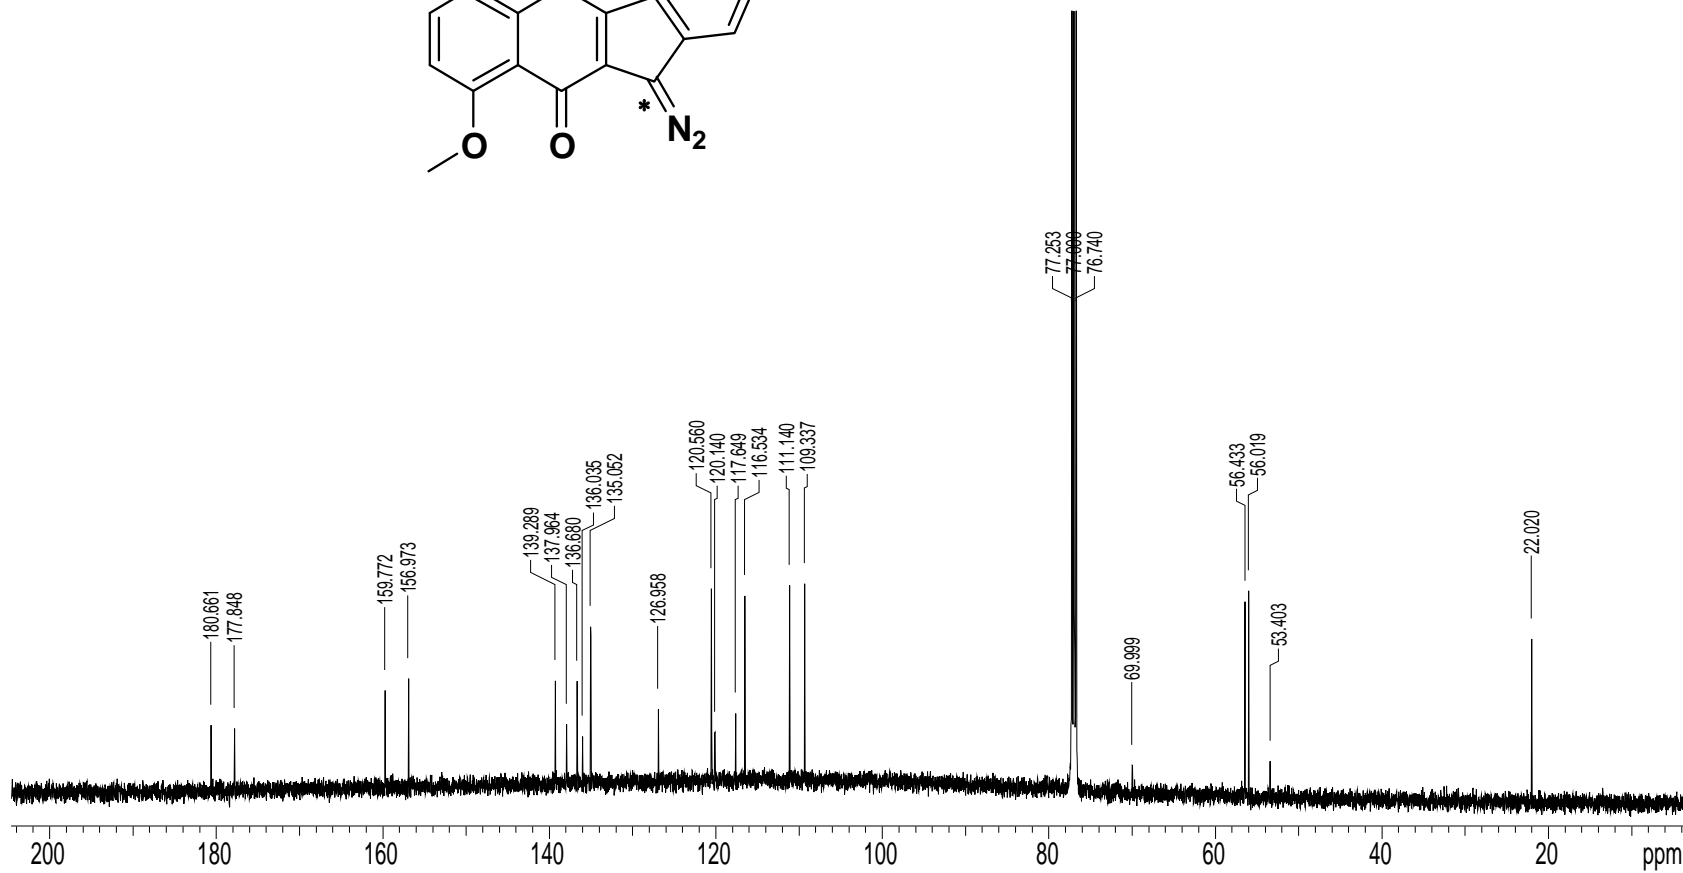

$^{13}\text{C}$ -NMR of **1\***

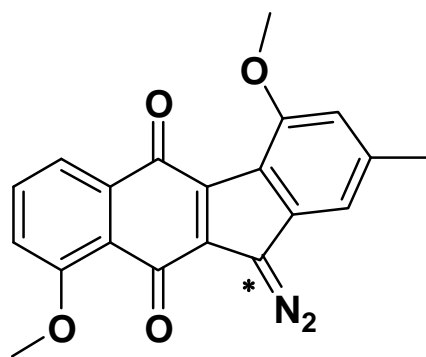

50%  $^{13}\text{C}$  enriched

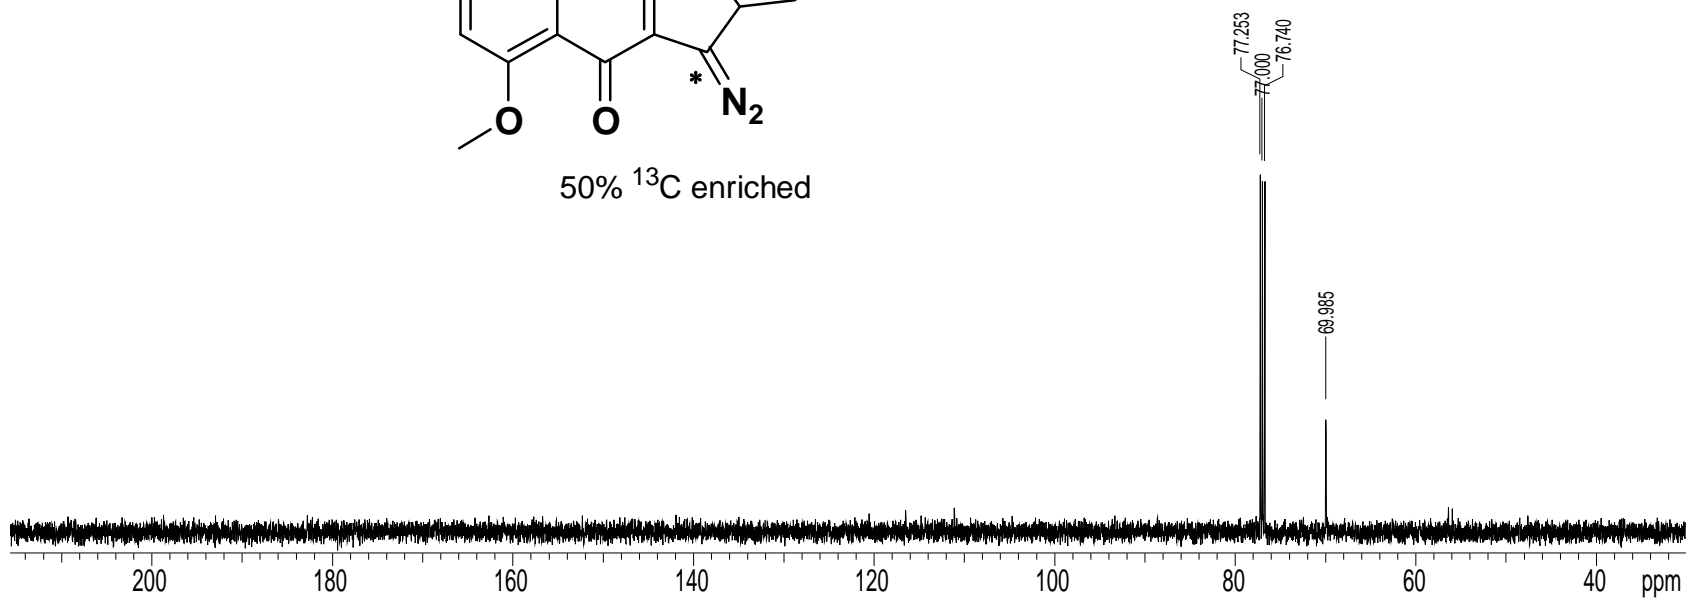

File:53935 Ident:38\_48-1\_11 Win 100PPM Acq:18-MAY-2006 14:15:59 +9:13 Cal:53935  
AutoSpecZTOFFPD EI+ Magnet BpM:347 BpI:192901 TIC:5843374 Flags:ACC  
File Text:Khdour/Skibo ; omk-k8 ; HREI

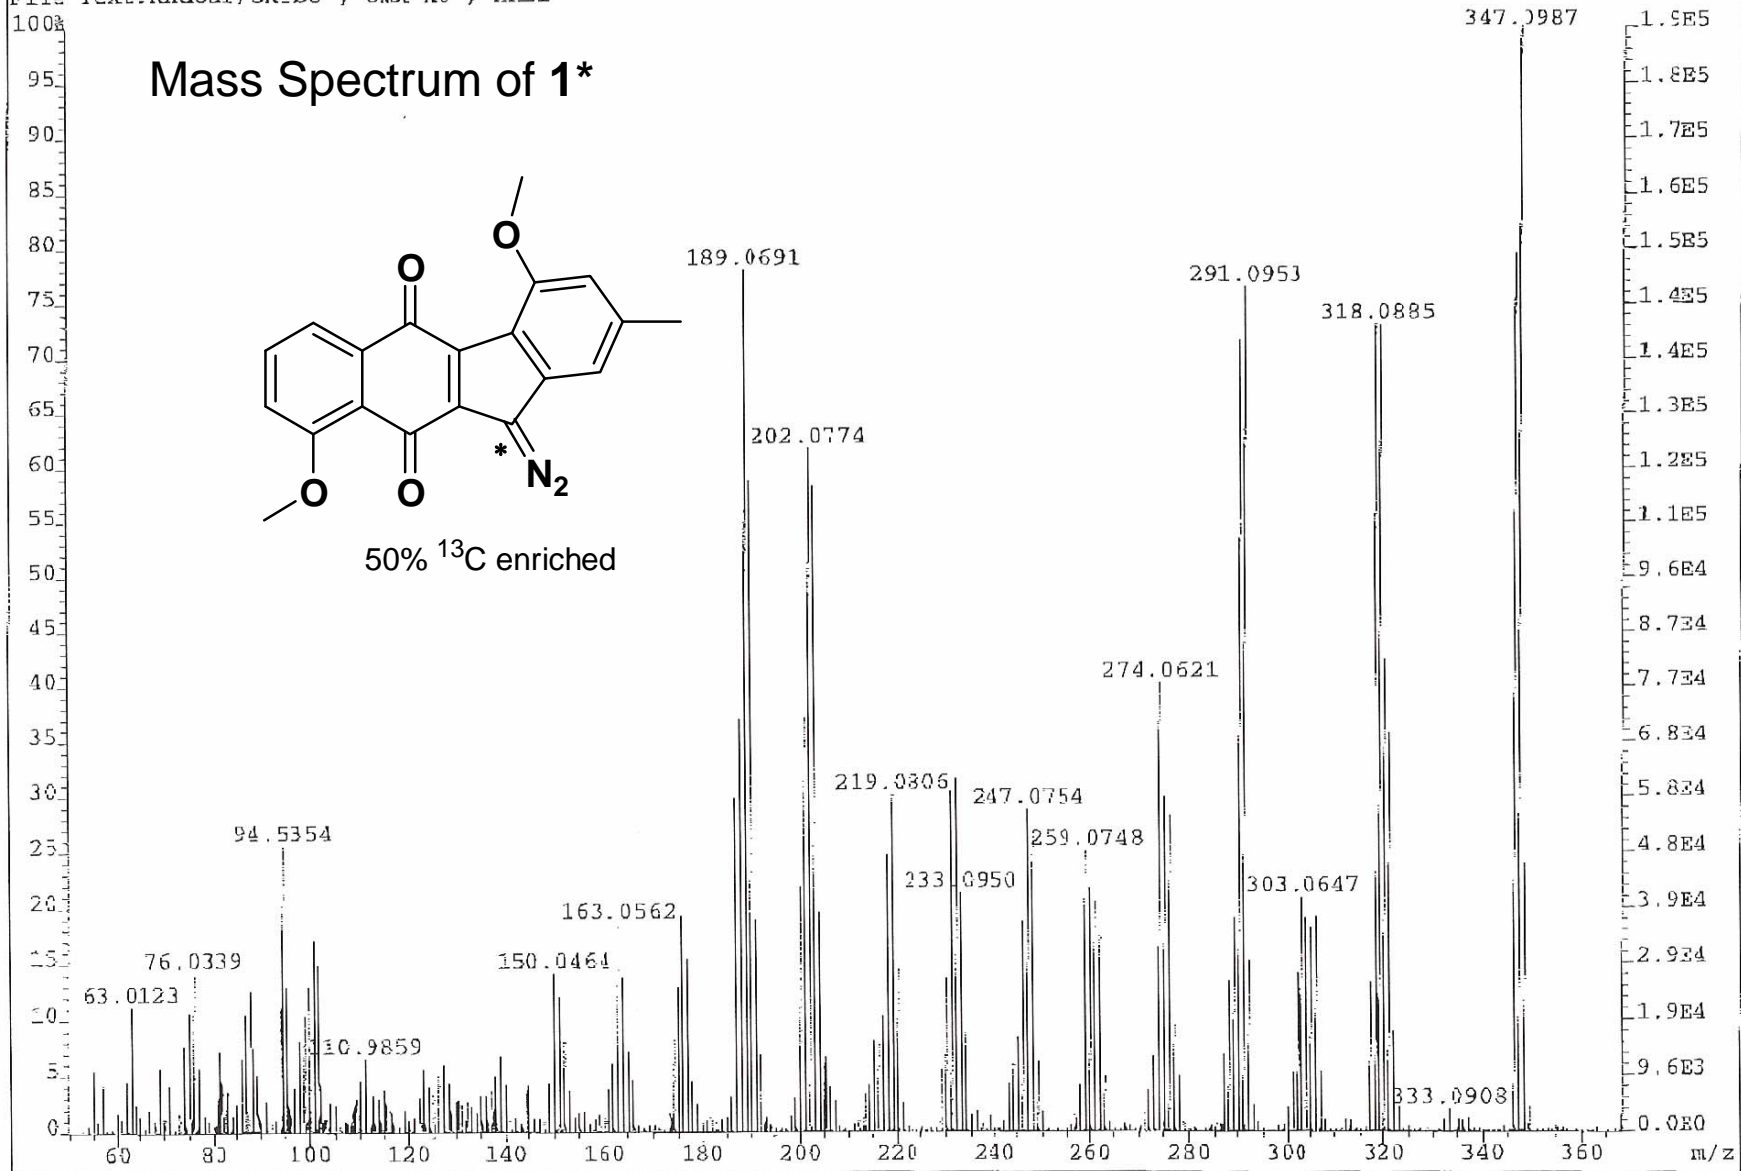



# H-NMR of **13\***

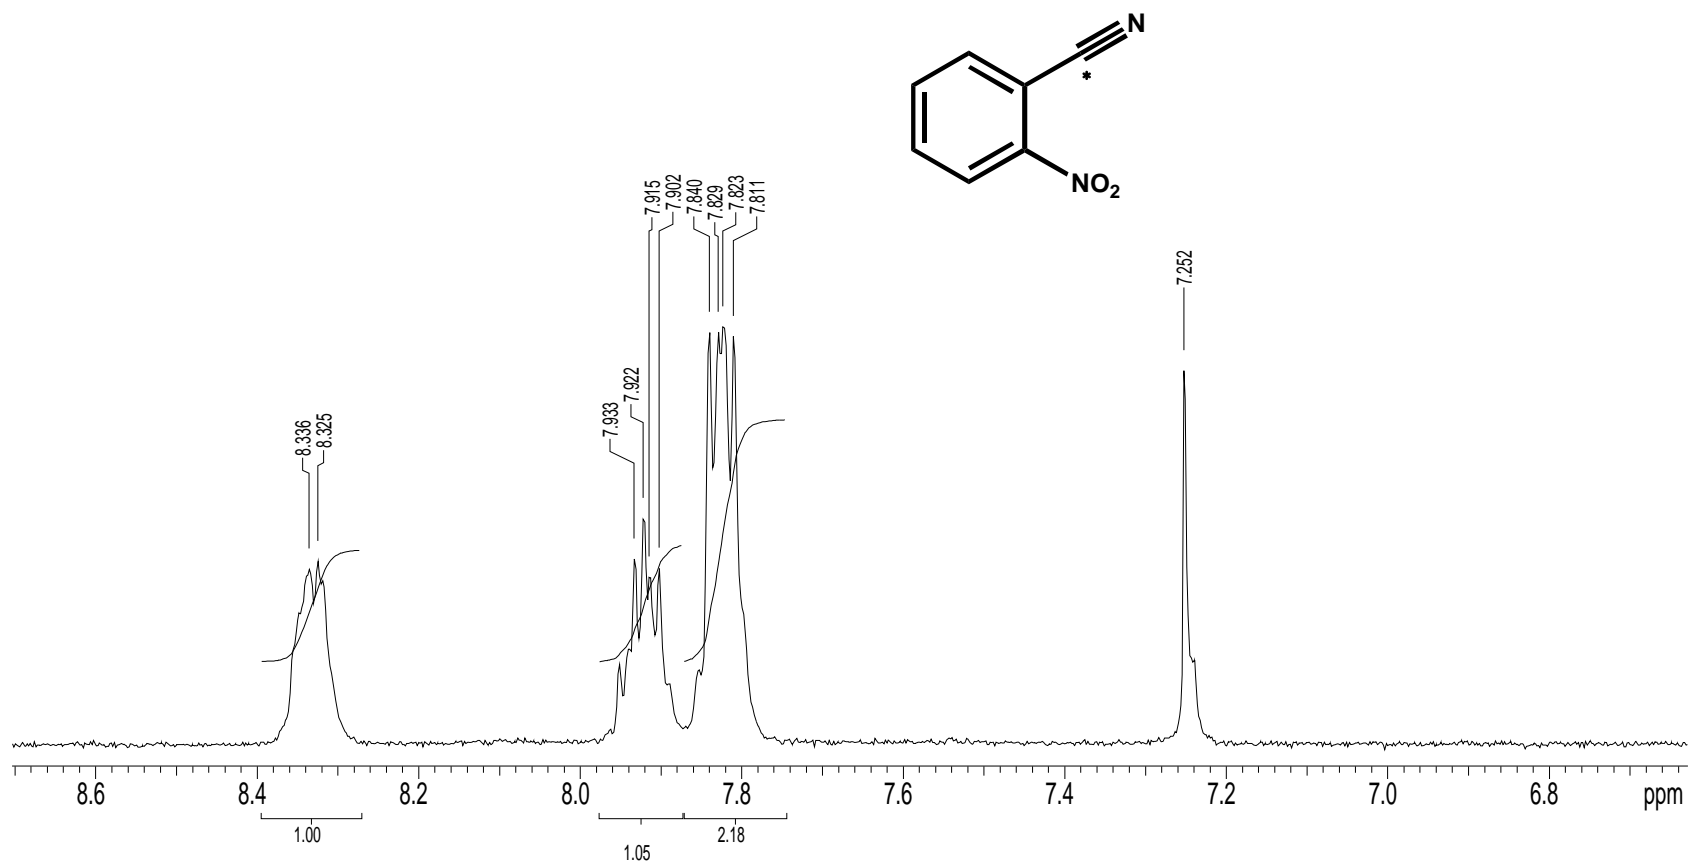

$^{13}\text{C}$ -NMR of **13\***

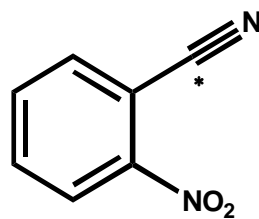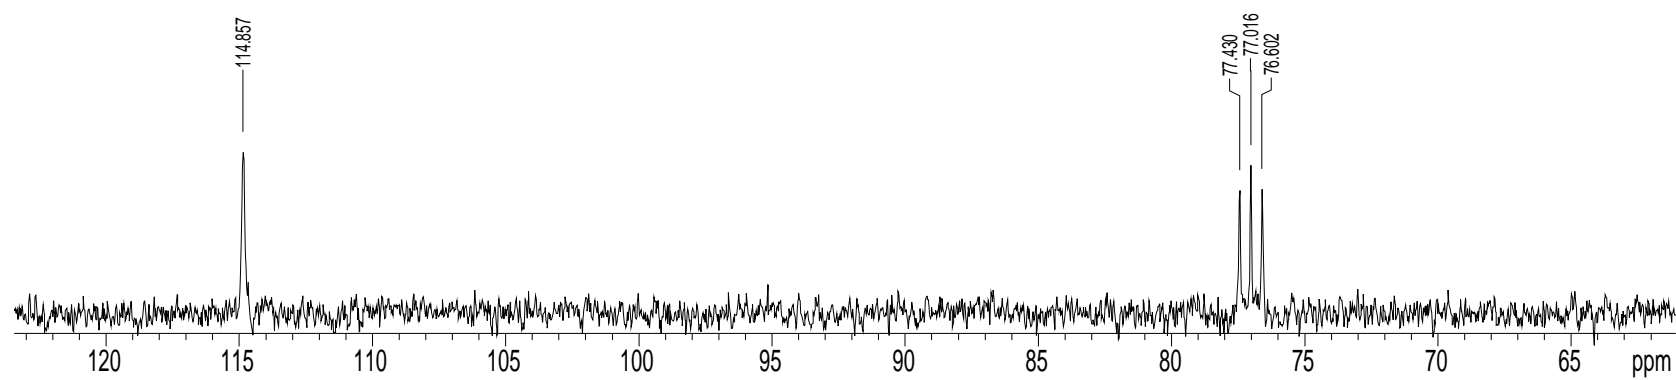

File:54111 Ident:15\_25-1\_1 Win 100PPM Acc:16-AJG-2006 13:11:25 +4:21 Cal:54111  
AutoSpecETOPFPD EI+ Magnet BpM:149 BpI:3610277 TIC:17168446 Flags:ACC  
File Text:Khdour/Skibo ; omk-kin1 ; HREI

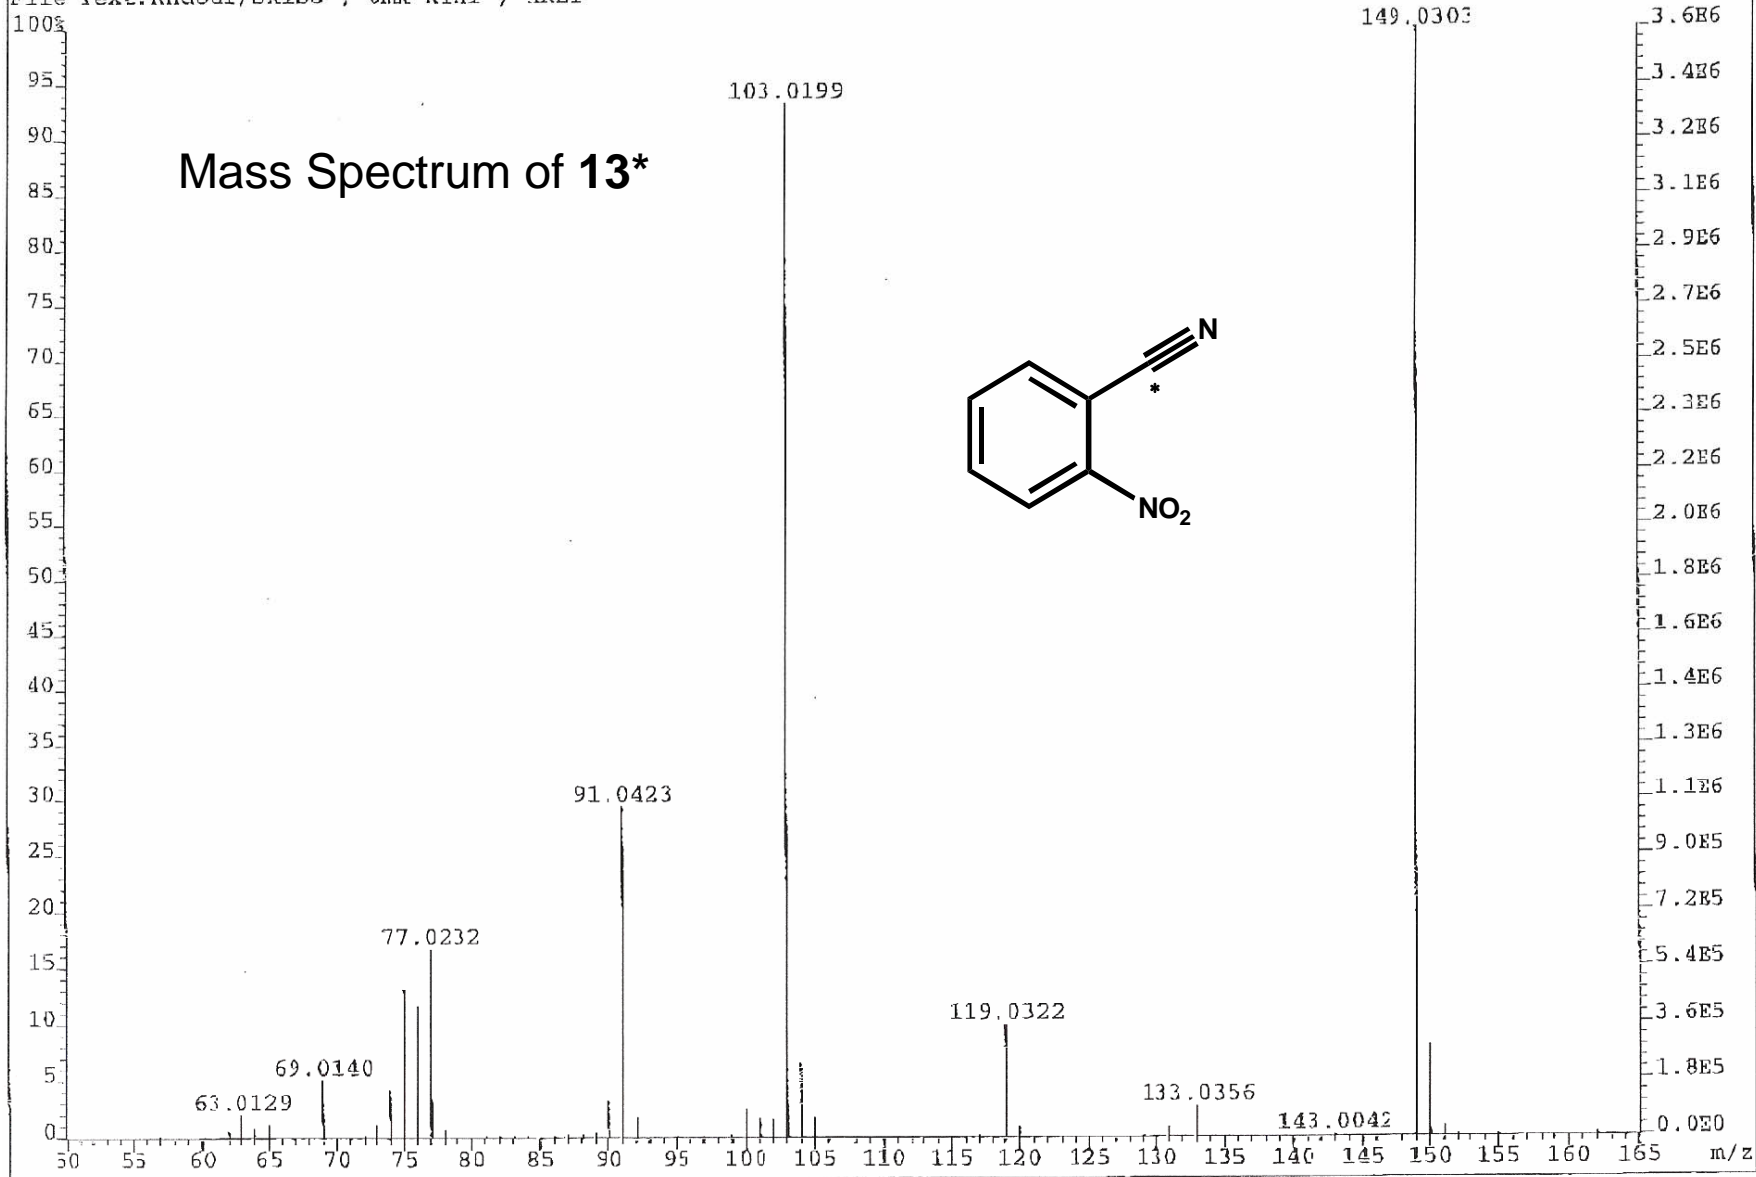

# H-NMR of 14\*

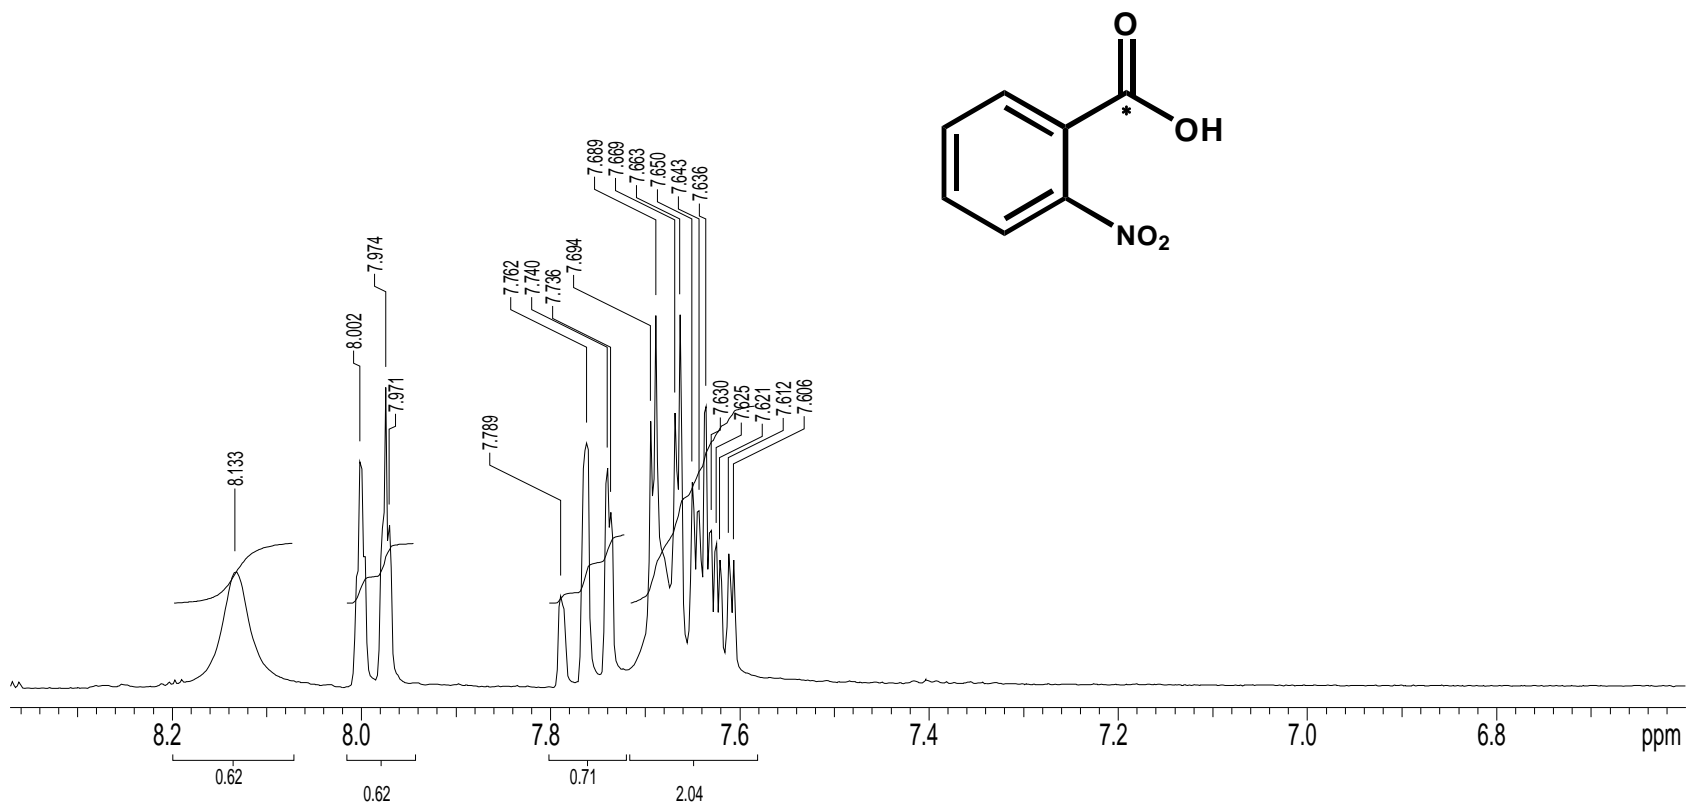

$^{13}\text{C}$ -NMR of **14\***

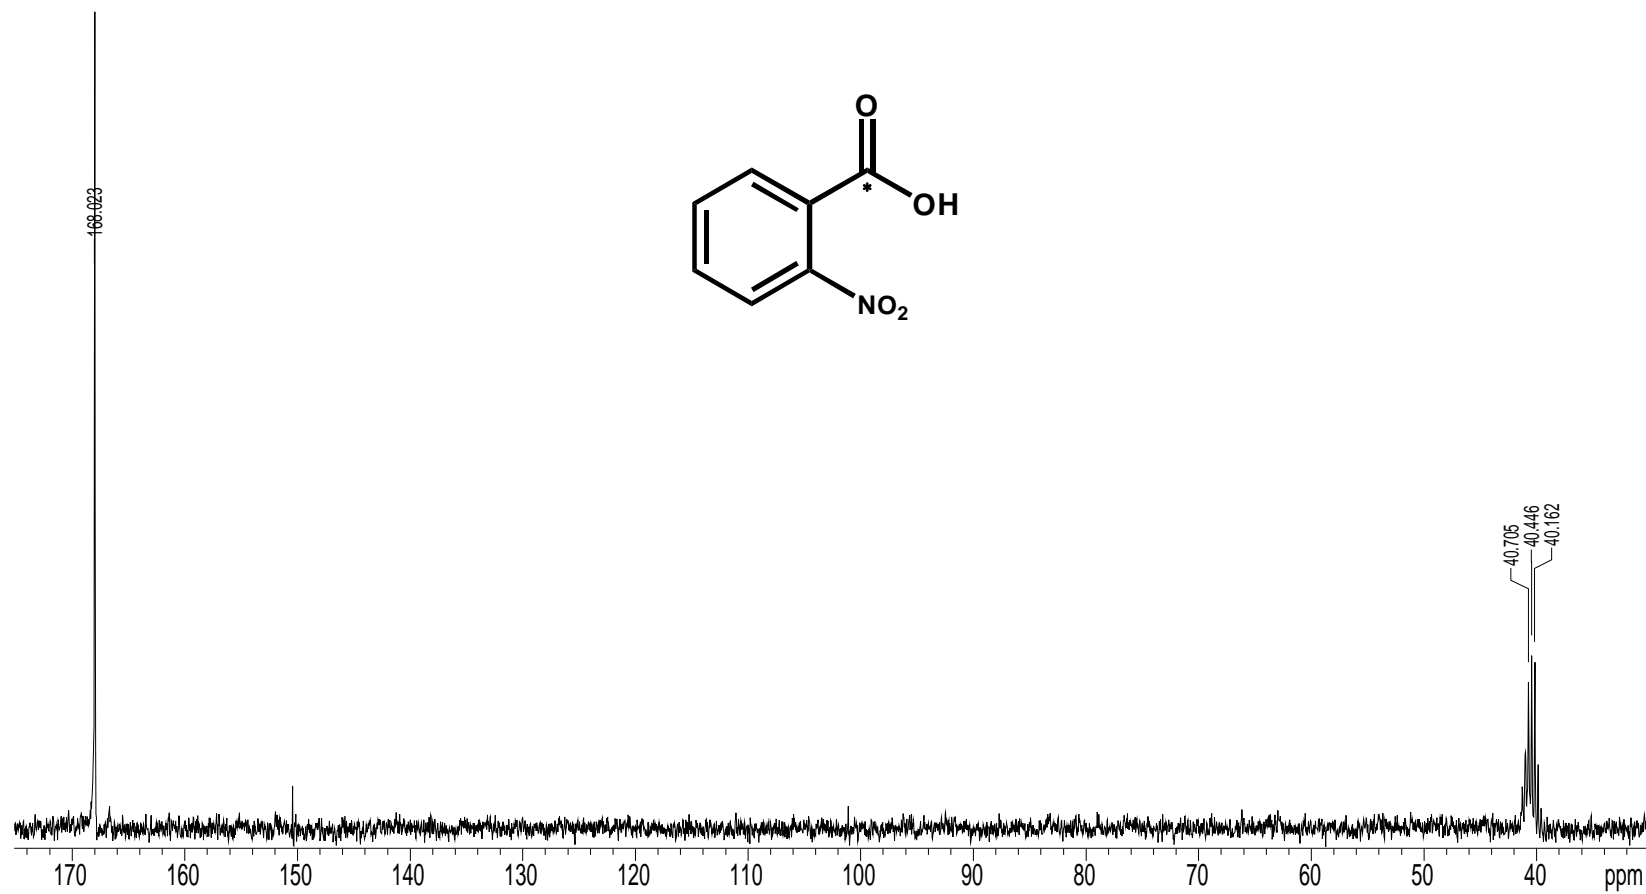

File:54112C Ident:38\_48-1\_11 Win 10CPM Acq:17-AUG-2006 10:55:16 +9:08 Cal:54112C  
AutoSpecXTOFFPD EI+ Magnet BpM:65 BpI:189690 TIC:1364534 Flags:ACC  
File Text:Khdour/Skibo ; amk-kin2 ; HREI

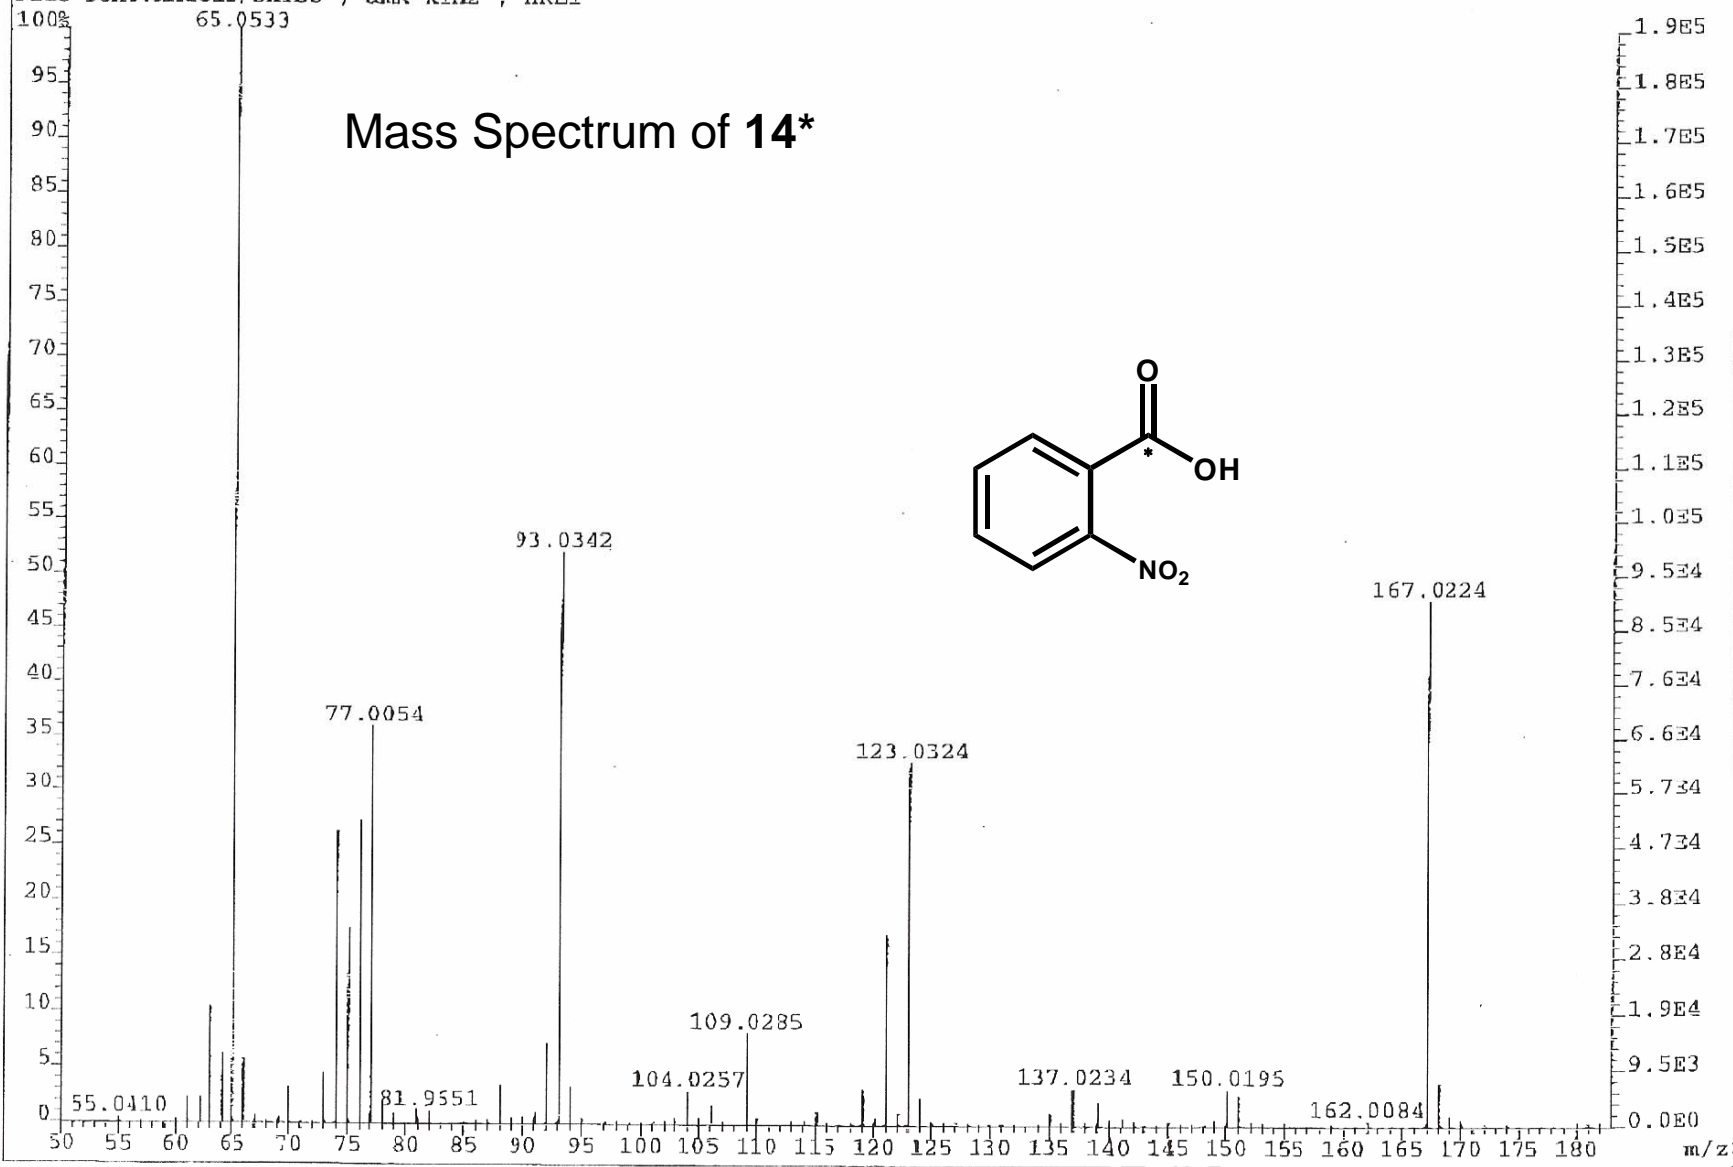

# H-NMR of 15\*

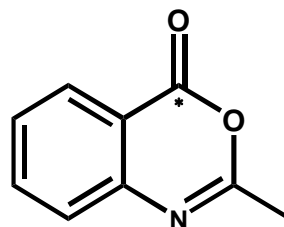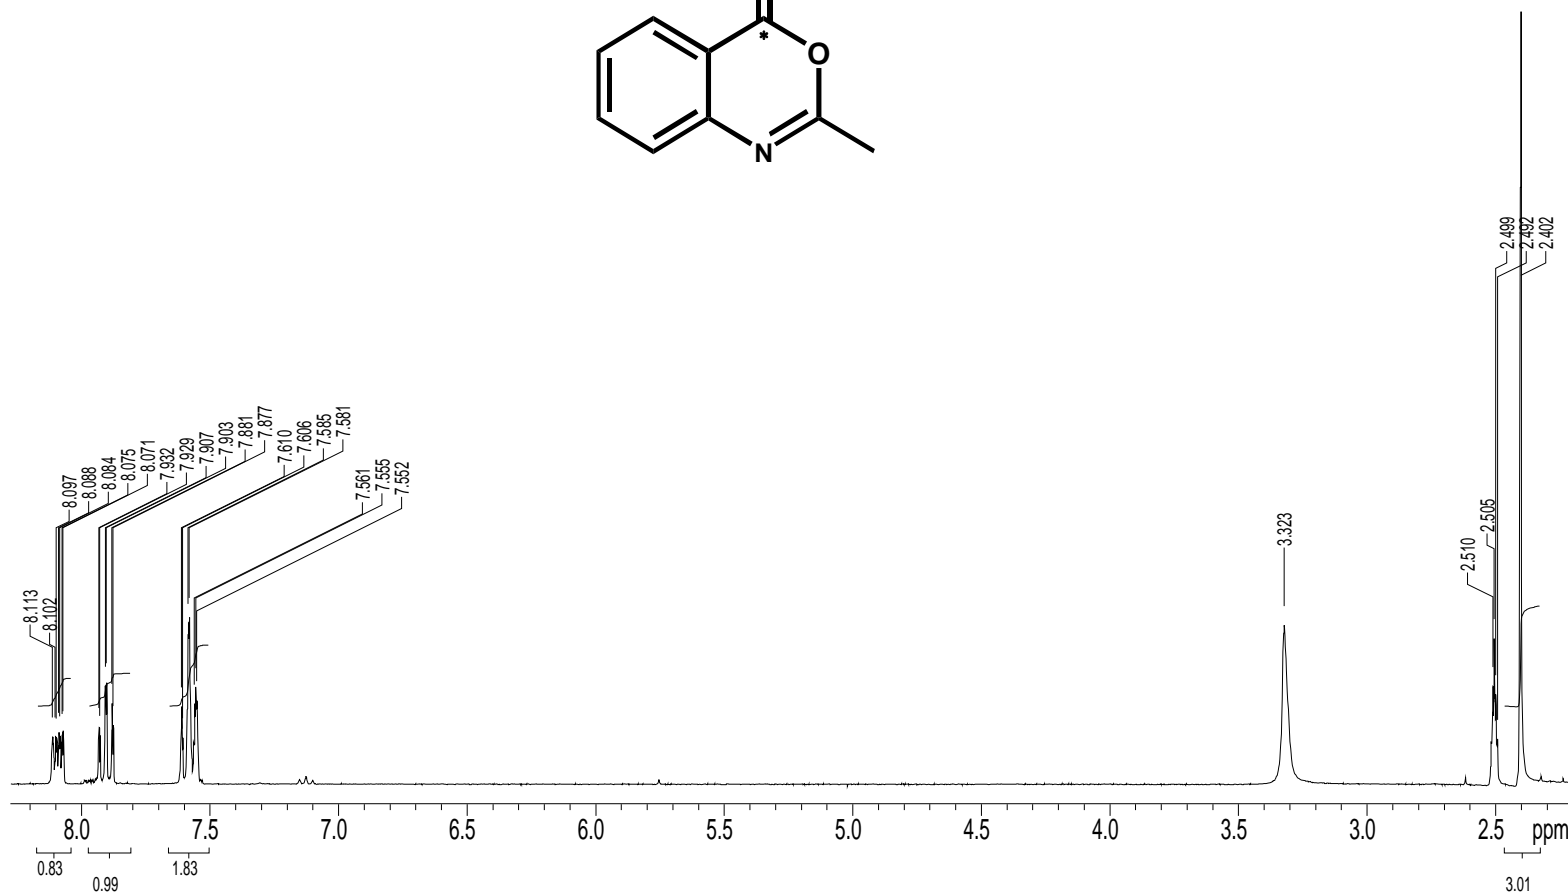

$^{13}\text{C}$ -NMR of **15\***

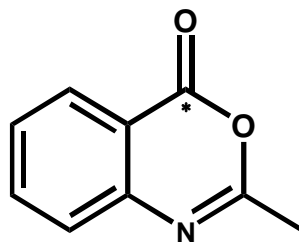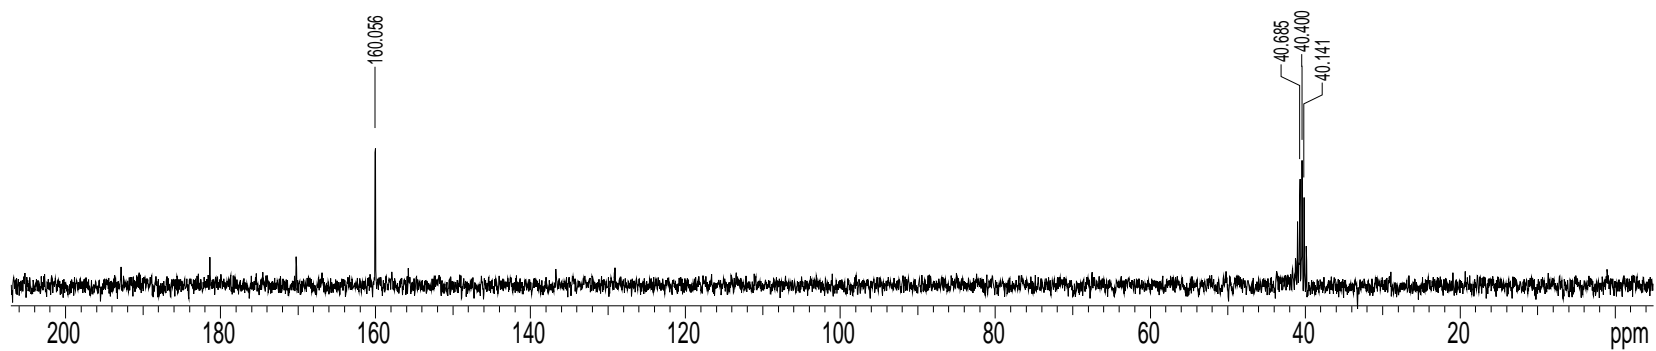



File: 54113A Ident: 25\_32-10\_20 Win 100PPM Acq: 16-AUG-2006 15:46:53 #6:07 Cal: 54113A  
AutoSpecTOPFPD EI+ Magnet BpM: 147 SpI: 4055556 TIC: 18551706 Flags: ACC  
File Text: Khmour/Skibo ; omk-kin3 ; HR&I

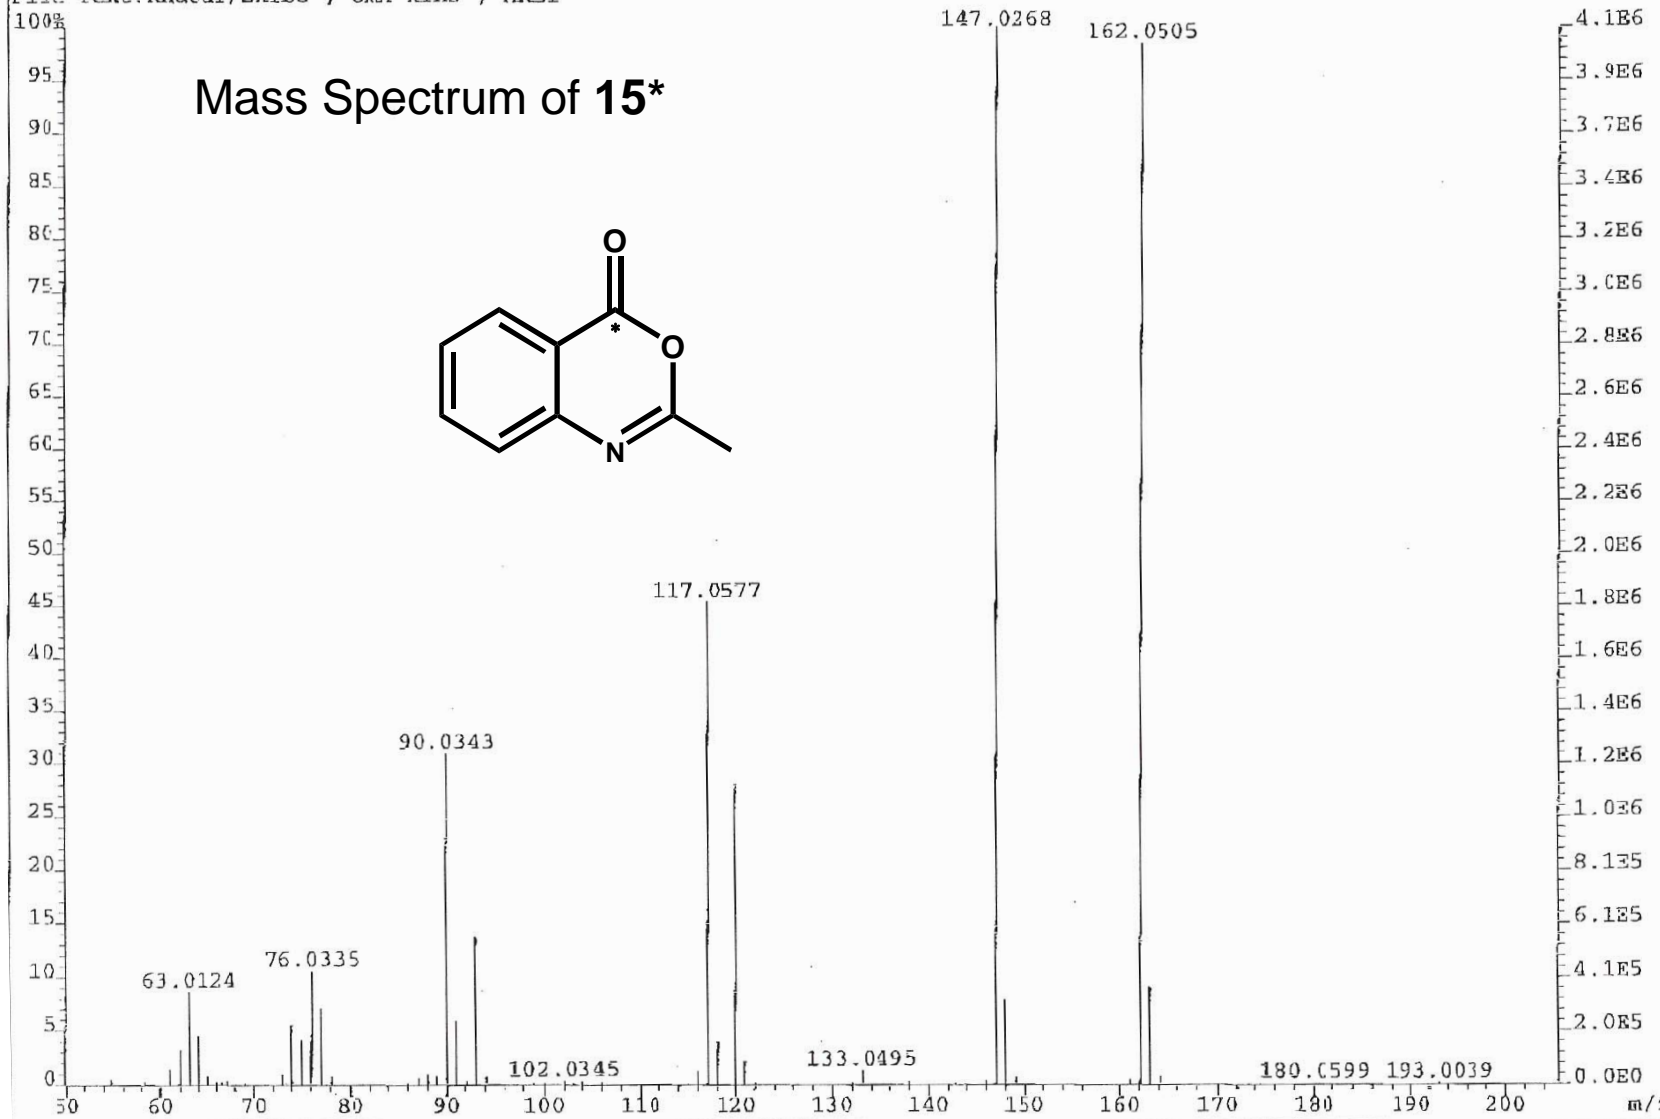

# H-NMR of 16

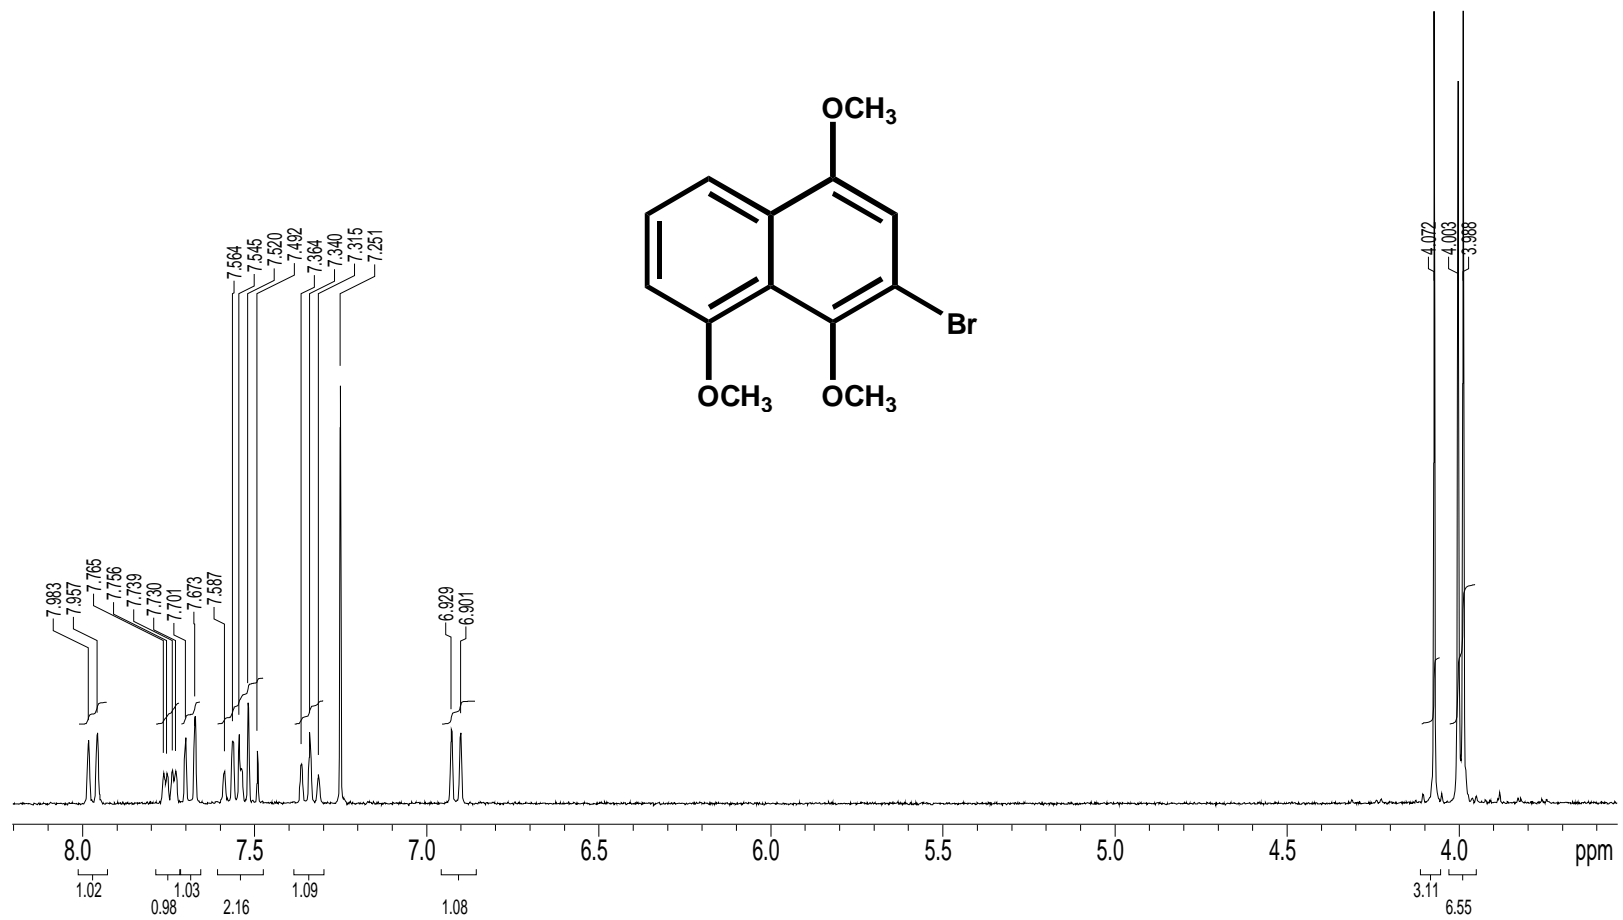

# H-NMR of 17\*

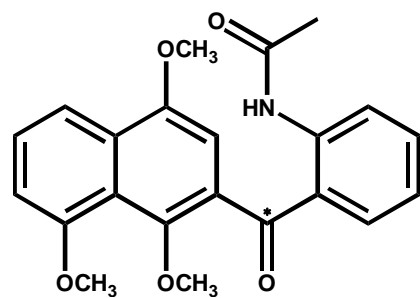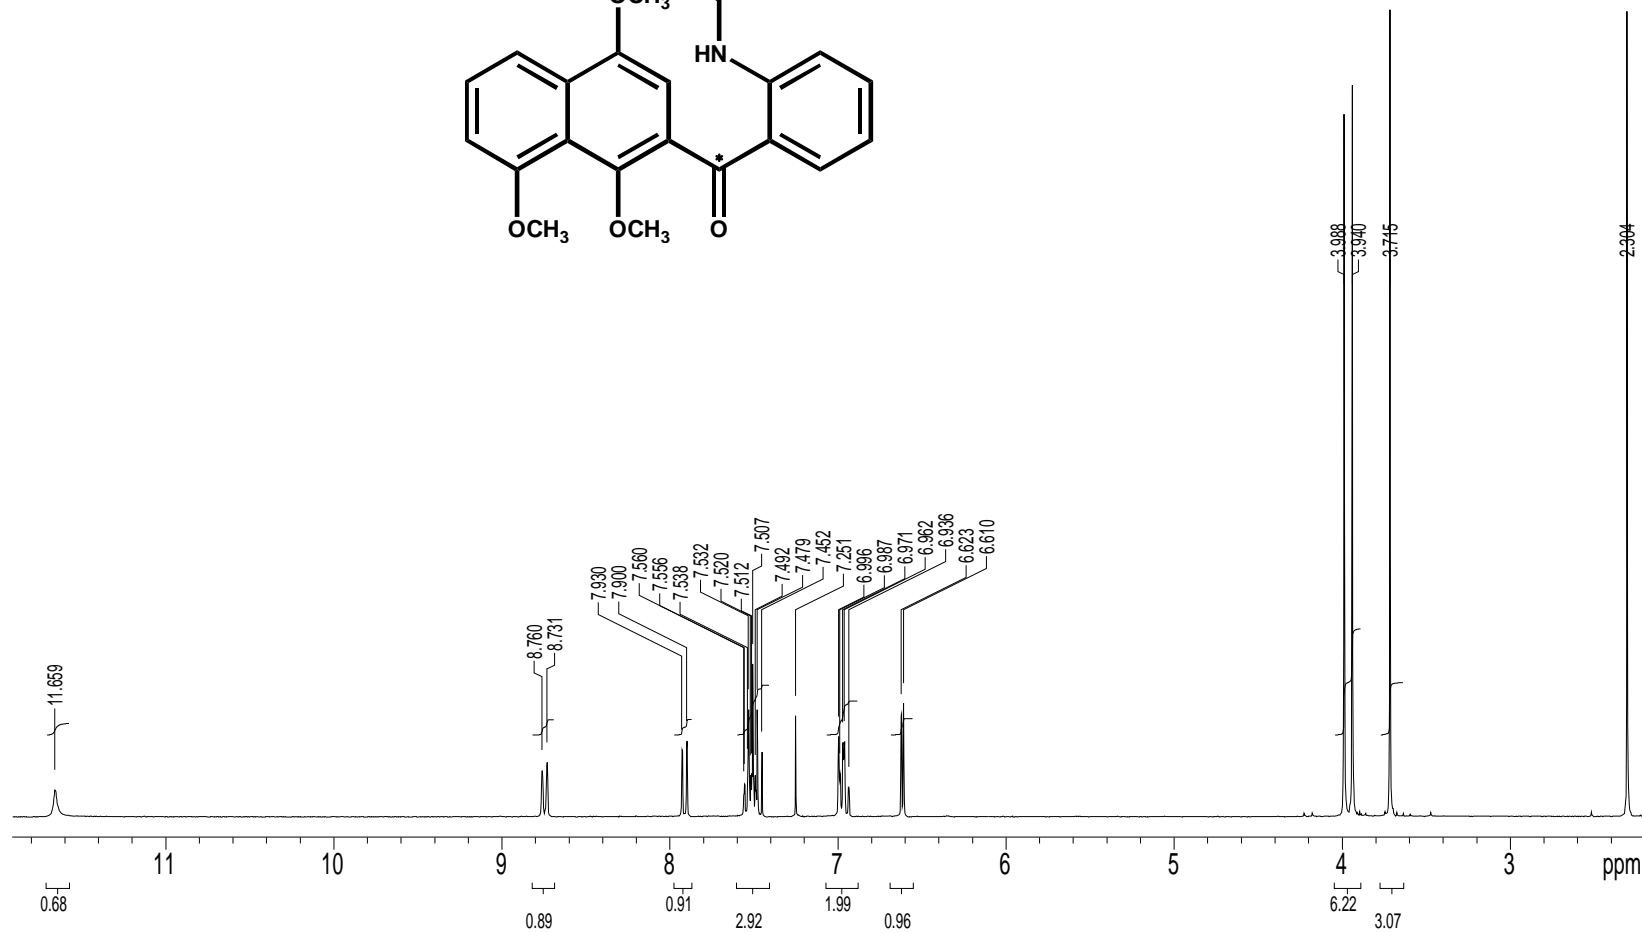

$^{13}\text{C}$ -NMR of **17\***

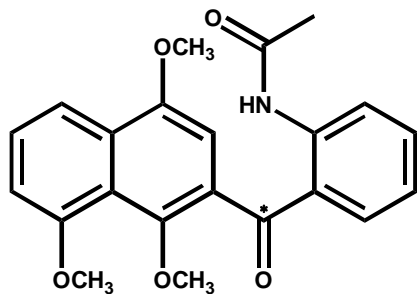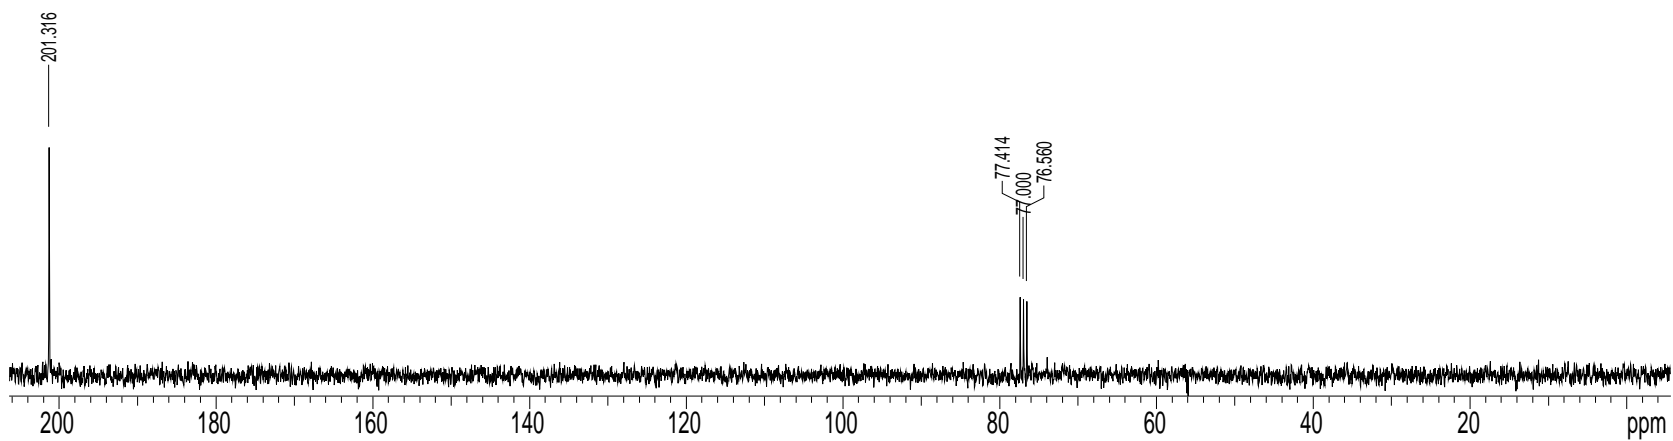

File:54114 Ident:21\_27-1\_8 Win 100PPM Acq:16-AUG-2006 16:15:01 +5:11 Cal:54114  
AutoSpecEToFPPD EI+ Magnet BpM:380 BpI:1578277 TIC:11177683 Flags:ACC  
File Text:Khdour/Skibo ; omk-kin4 ; HREI

# Mass Spectrum of 17\*

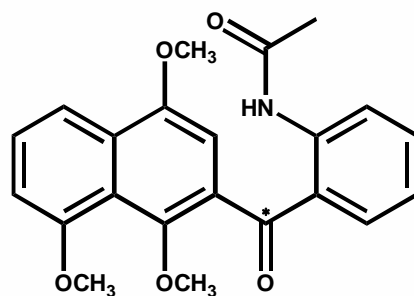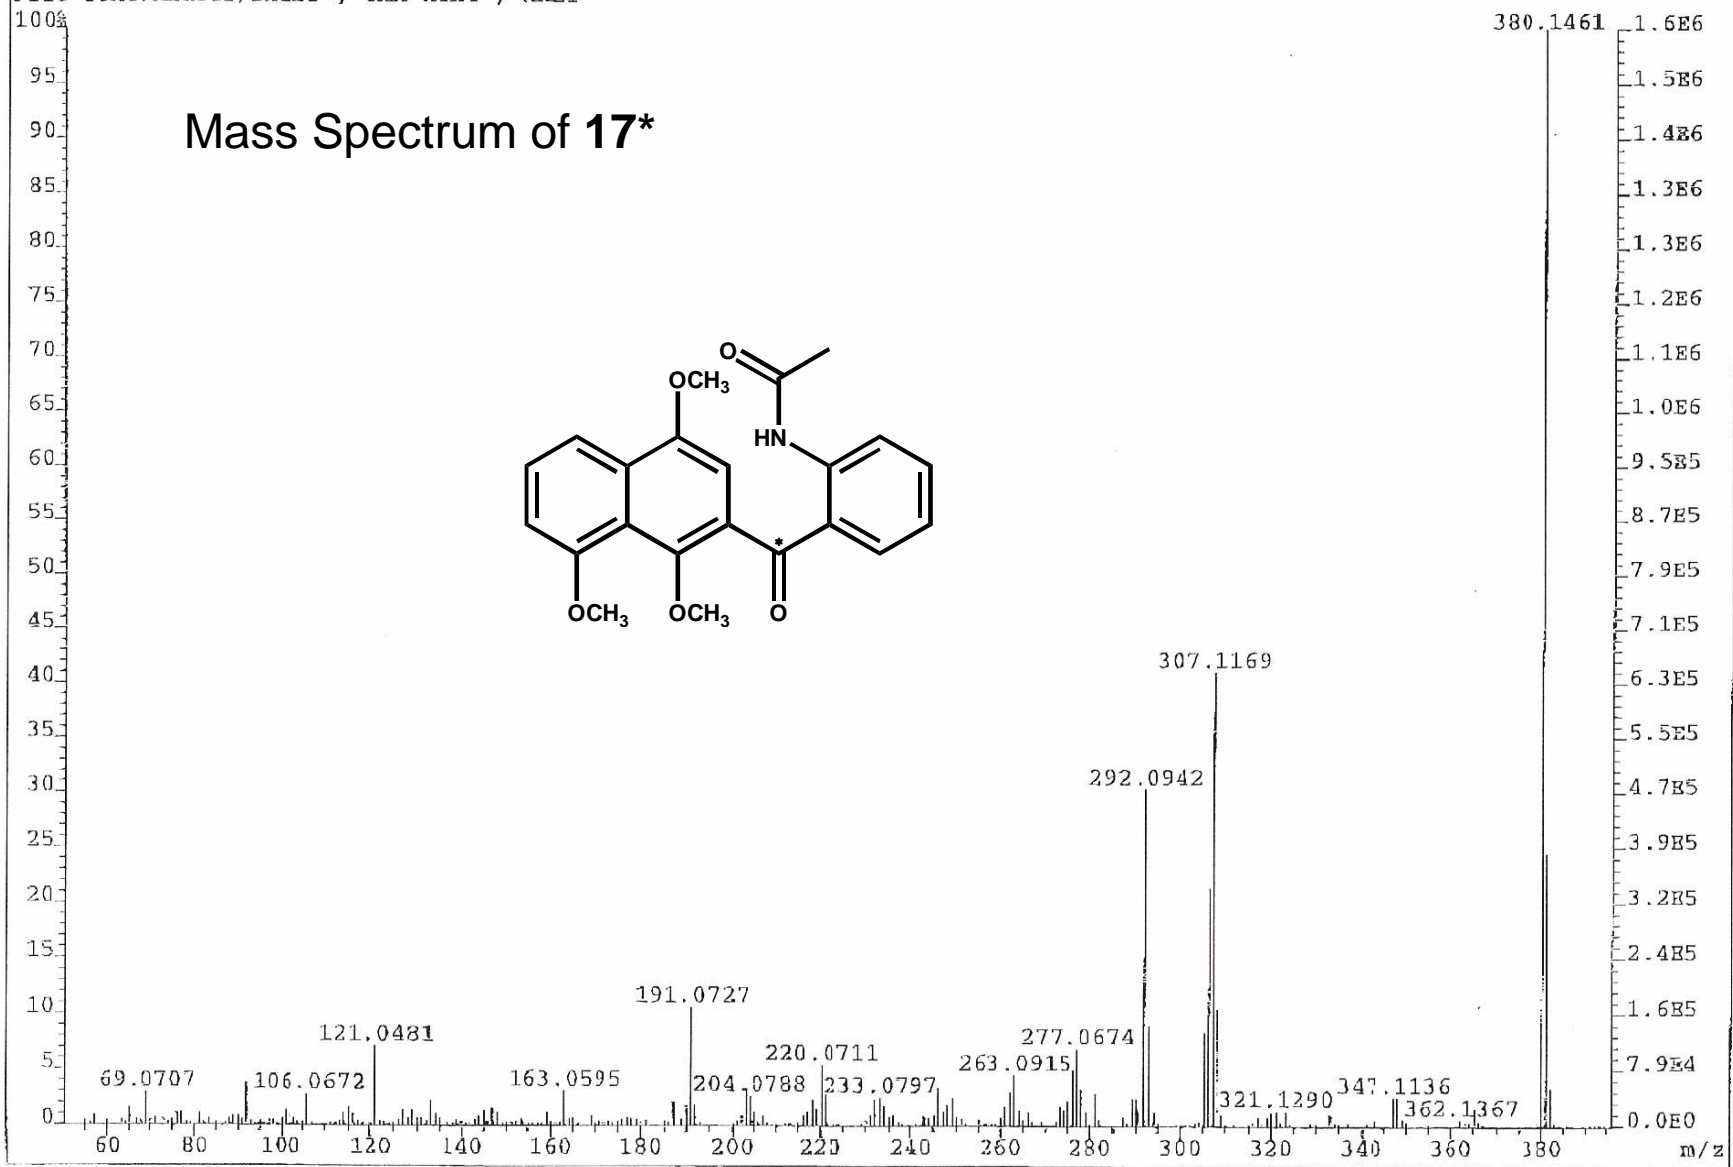

# H-NMR of 18\*

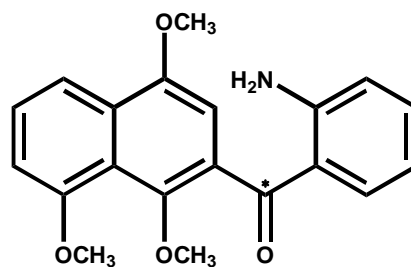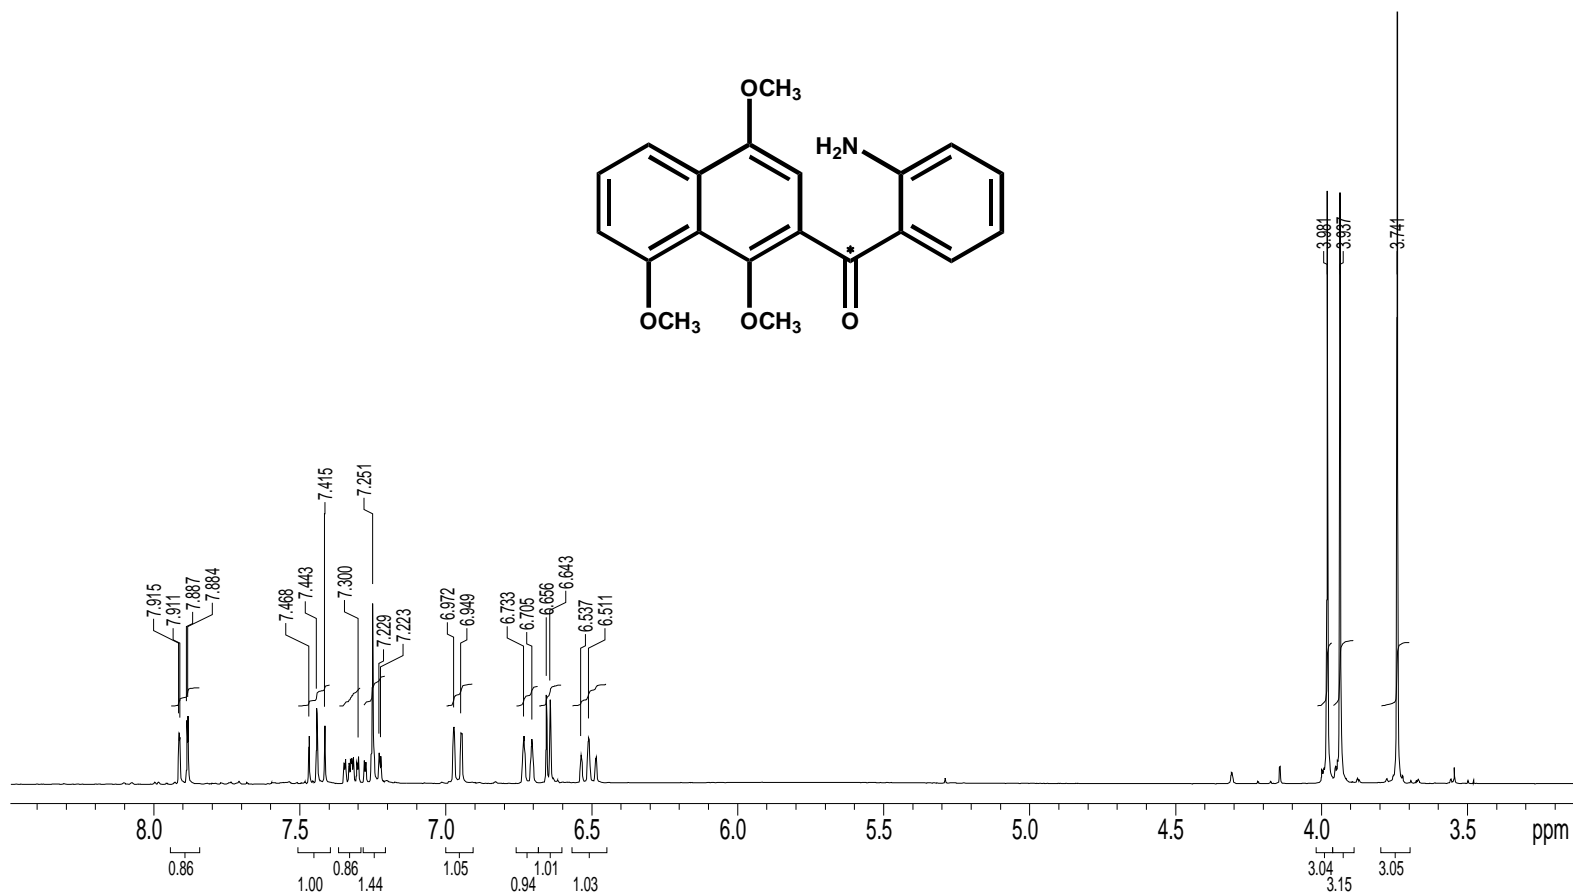

$^{13}\text{C}$ -NMR of **18\***

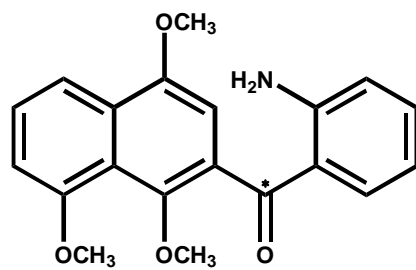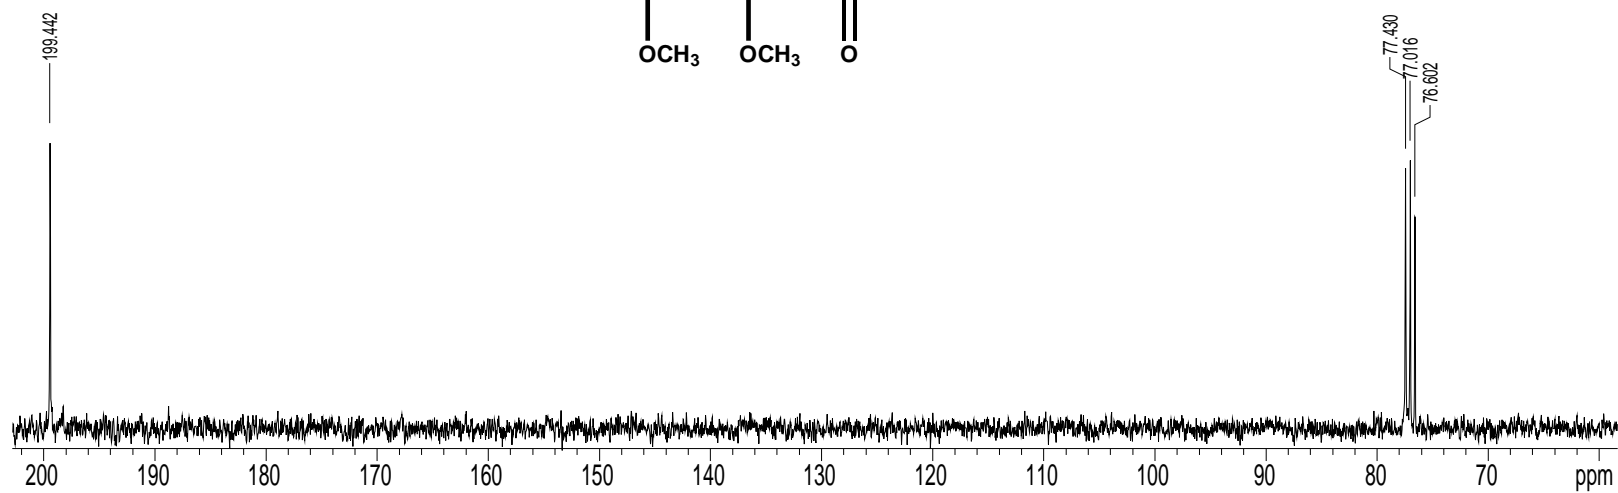

File:54115 Ident:15\_25-1\_11 Win 100PPM Acq:16-AUG-2006 16:32:50 +4:21 Cal:54115  
AutoSpecETOFFPD EI+ Magnet BpM:307 BpI:404803 TIC:4732572 Flags:ACC  
File Text:Khdour/Skibo ; omk-kin5 ; HREI

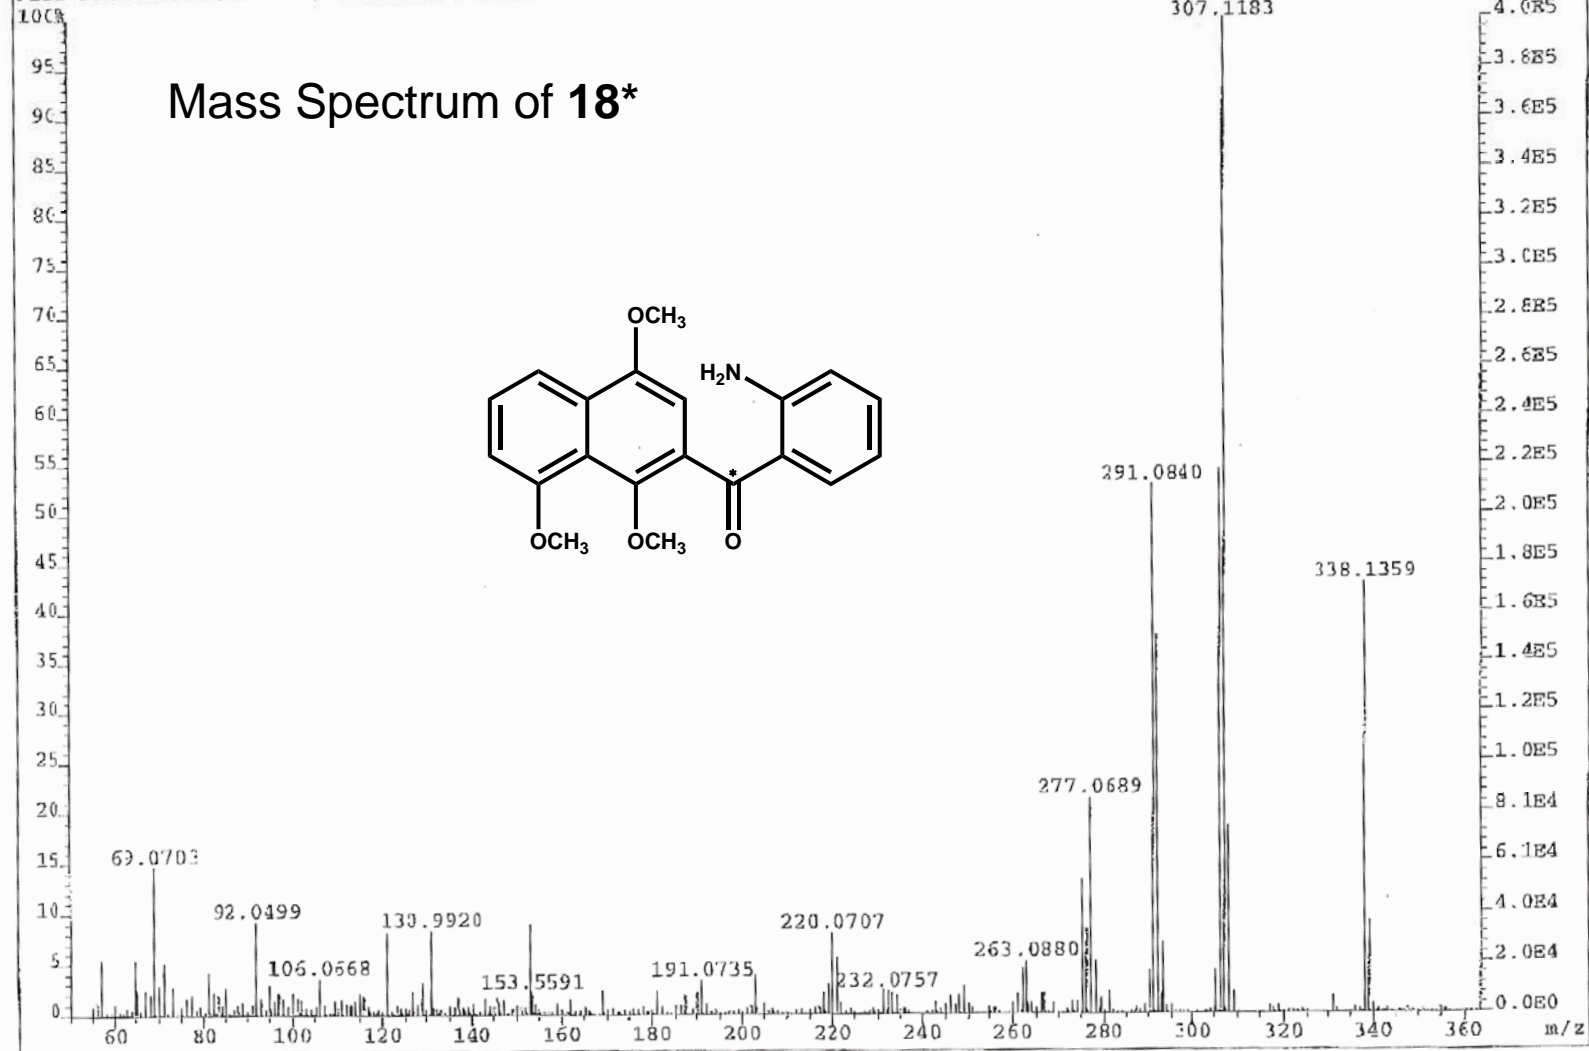



# H-NMR of 19\*

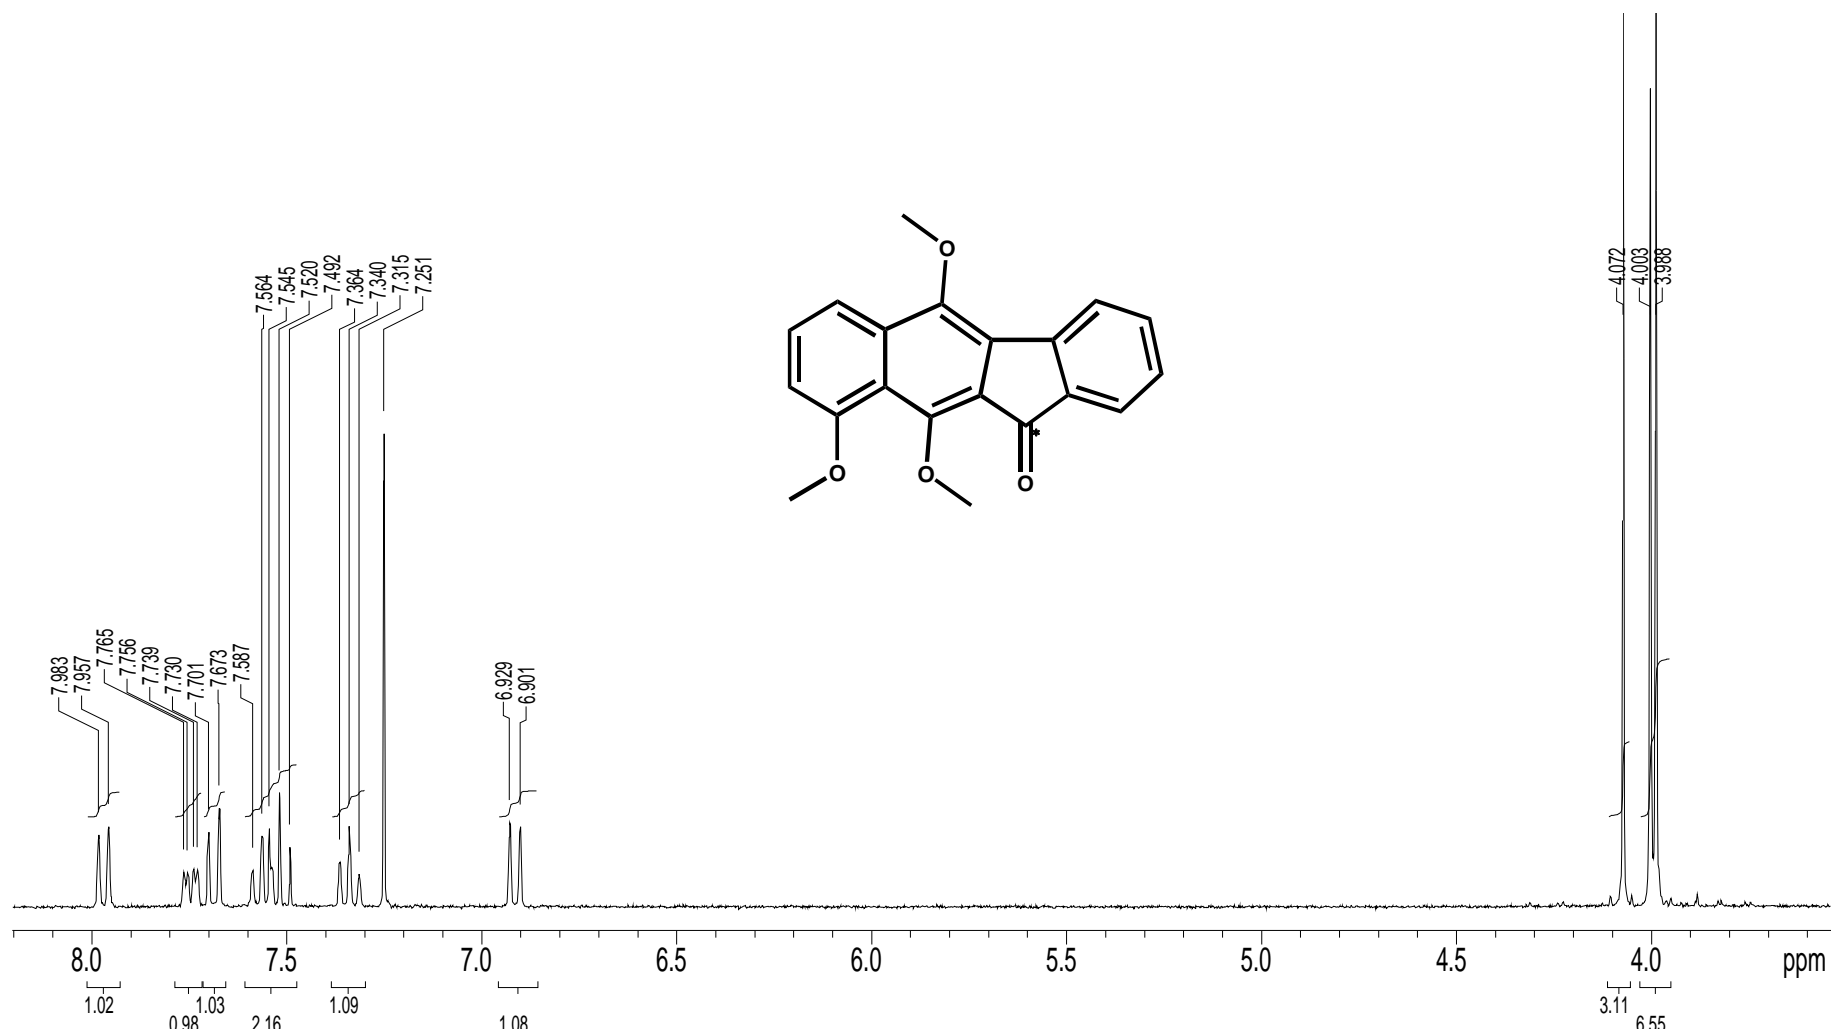

$^{13}\text{C}$ -NMR of **19\***

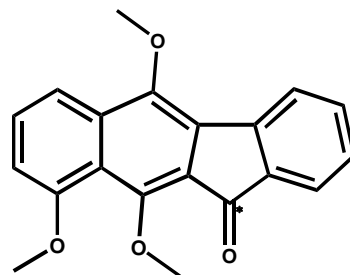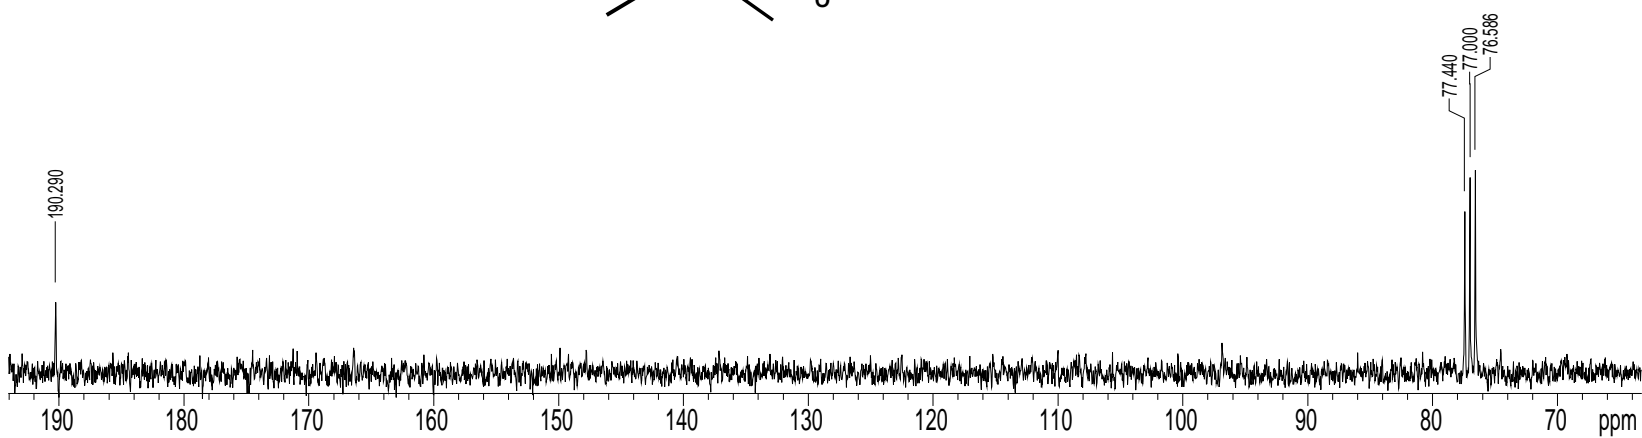

# H-NMR of 2\*

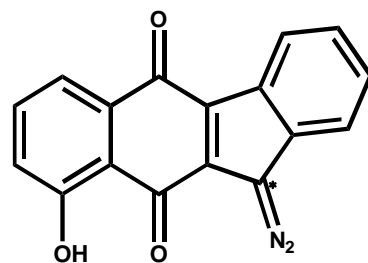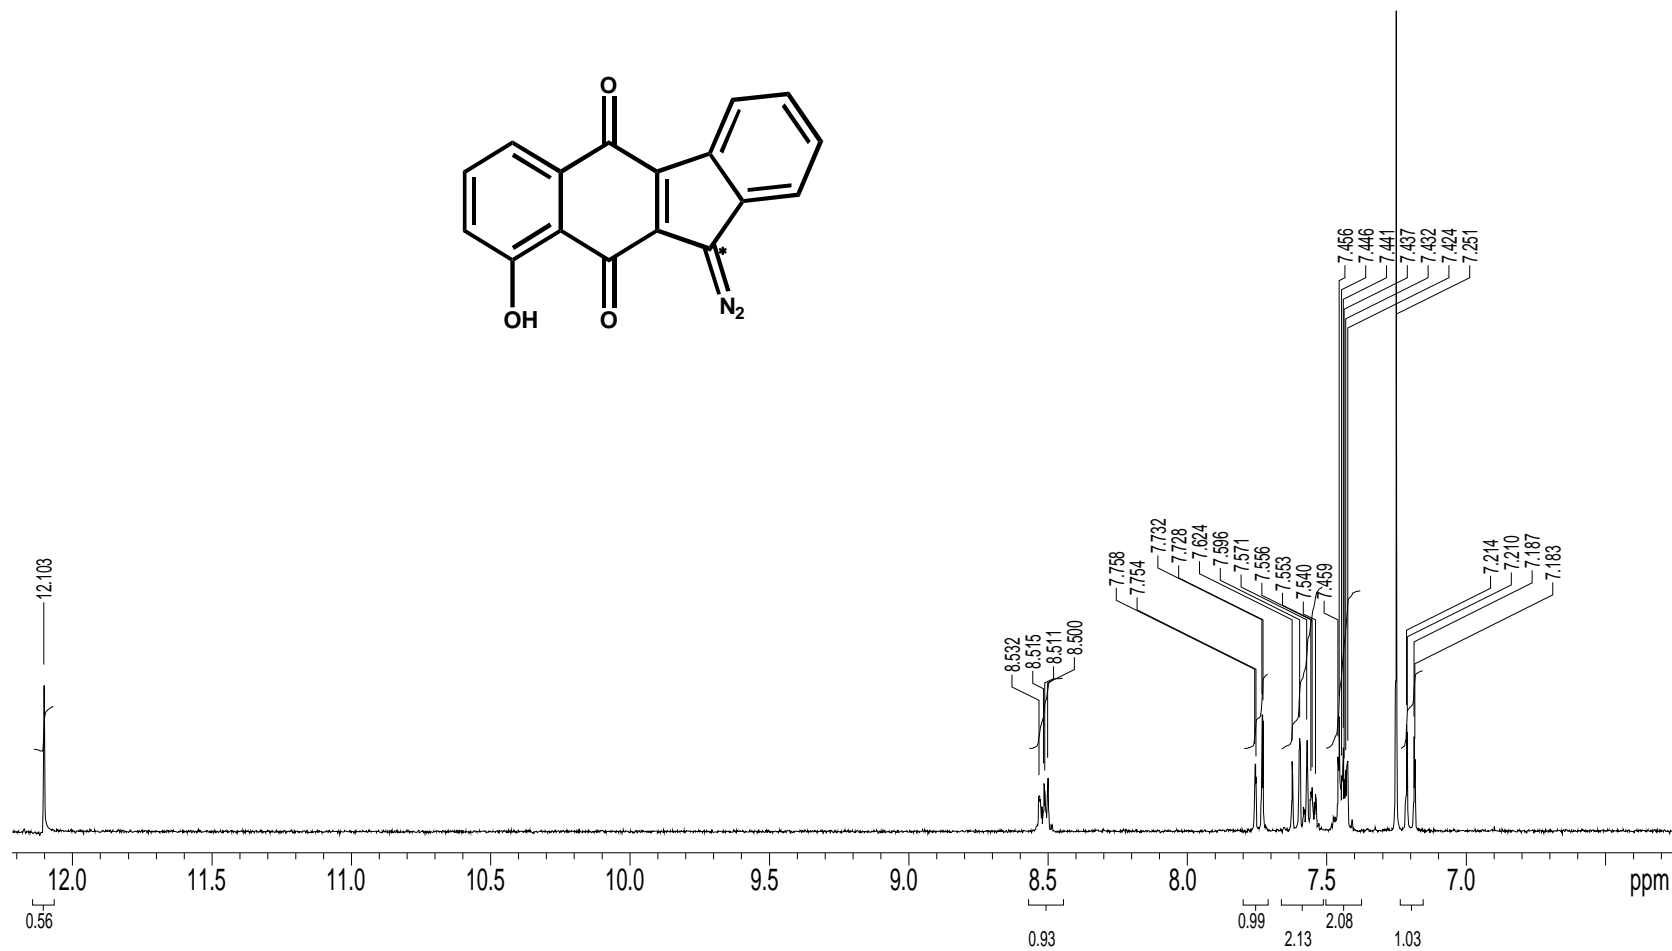

$^{13}\text{C}$ -NMR of **2\***

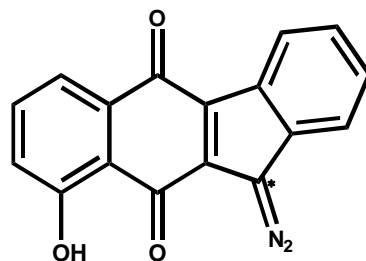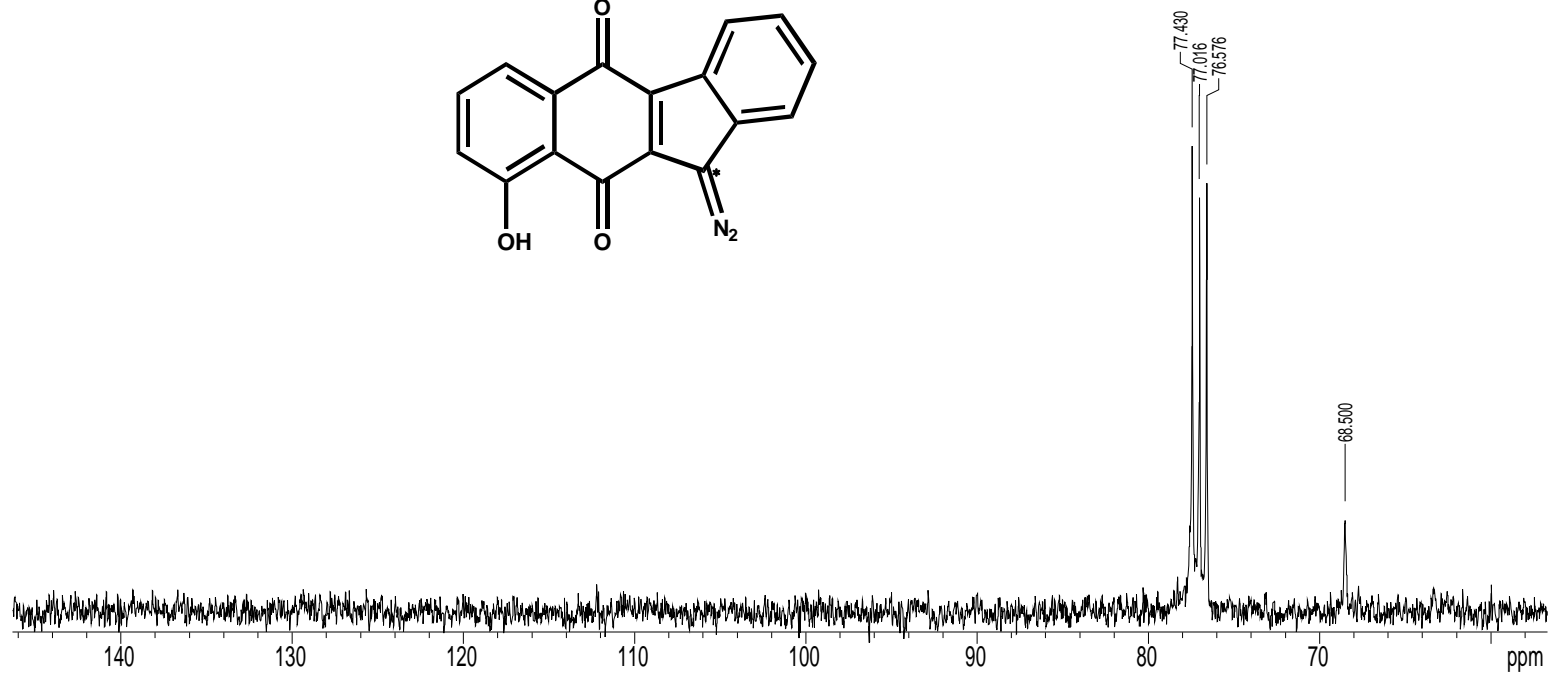

File:54117A Ident:47\_52-1\_12 Win 100PPM Acq:17-AUG-2006 10:01:17 +10:29 Cal:54117A  
AutoSpecFTOPFPD EI+ Magnet BpM:233 BpI:2897558 TIC:28580344 Flags:ACC  
File Text:Khmour/Skibo ; omk-kin7 ; HREI

$^{12}\text{C}, ^{13}\text{C}, \text{H}, \text{N}, \text{O}_2$  289.0569

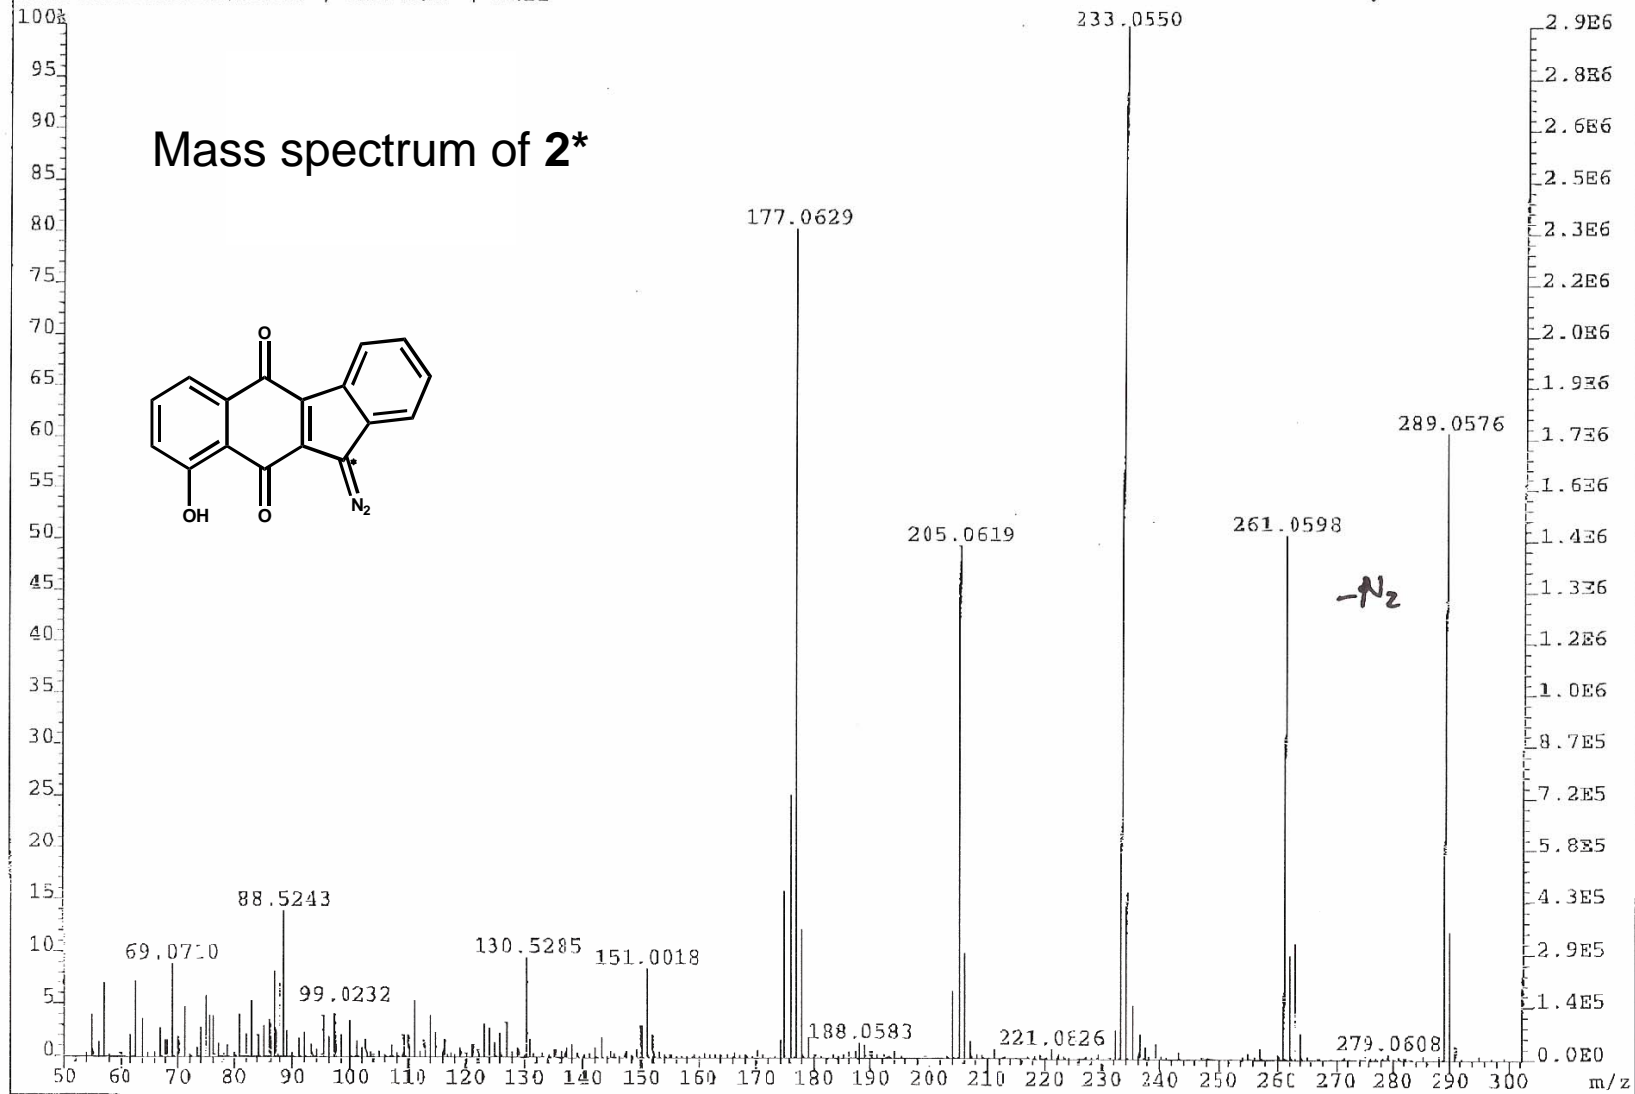

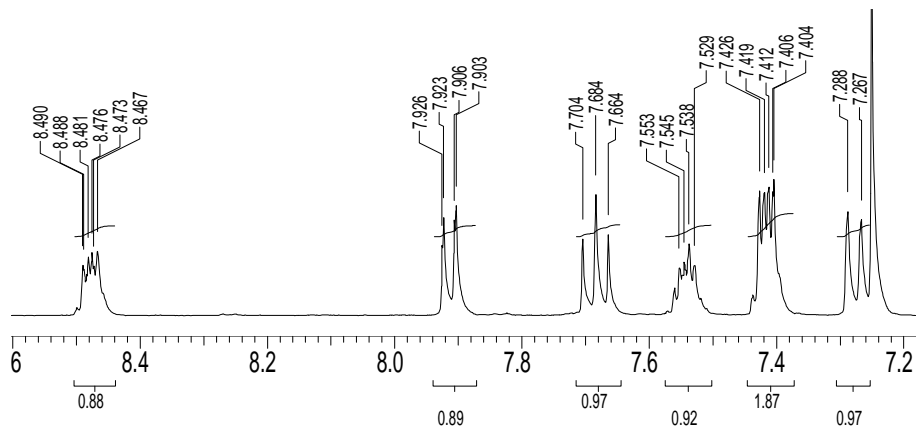

H-NMR of 3\*

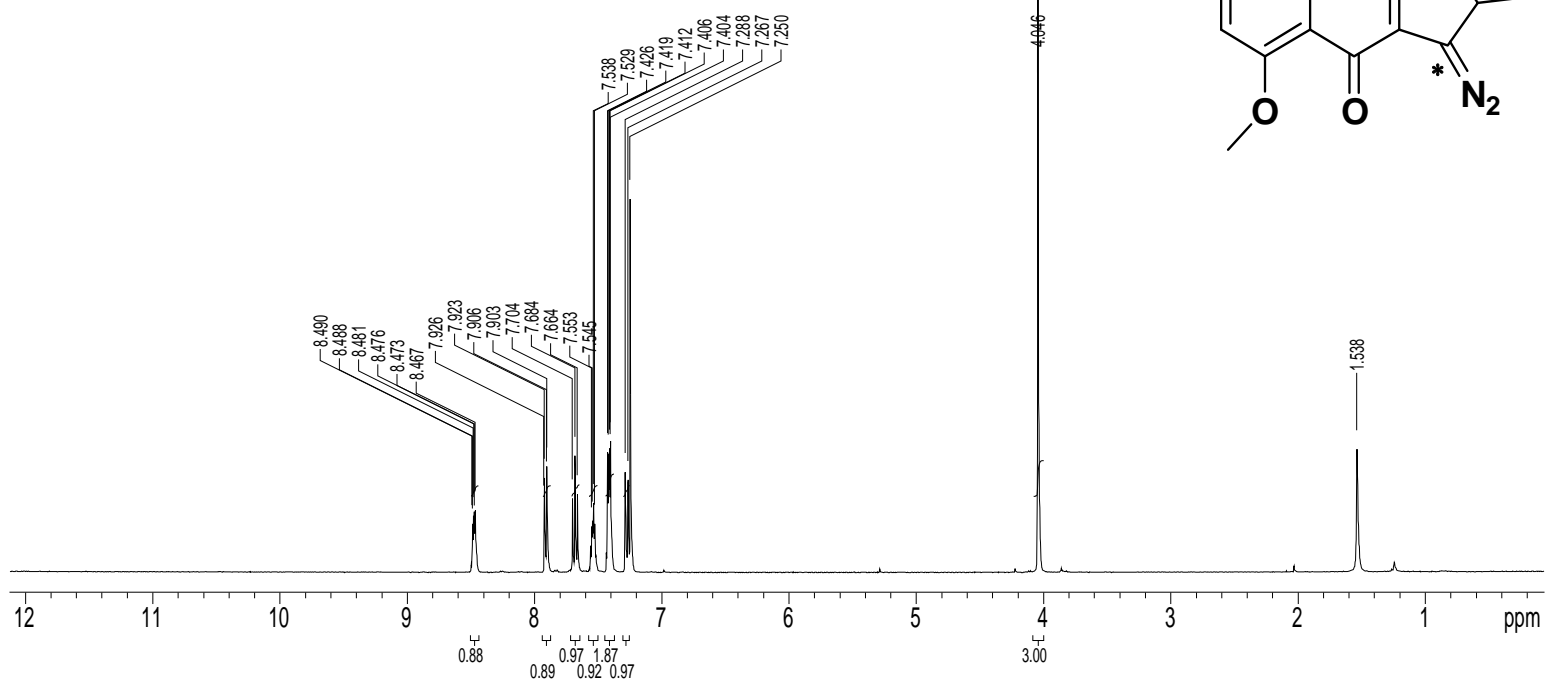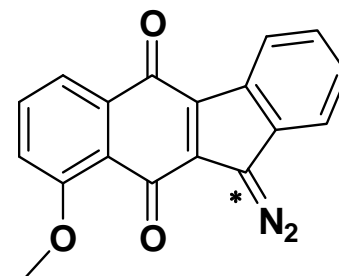

$^{13}\text{C}$ -NMR of **3\***

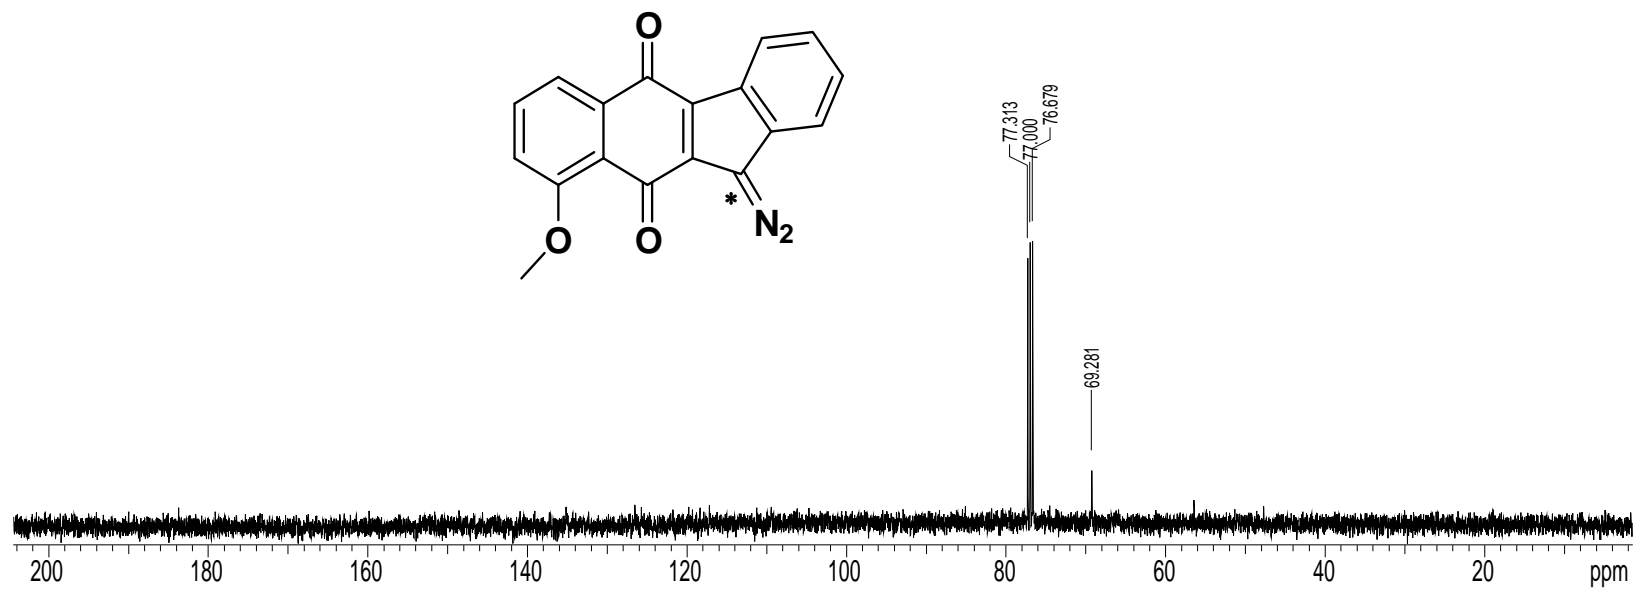

# $^{13}\text{C}$ -NMR of **3\***

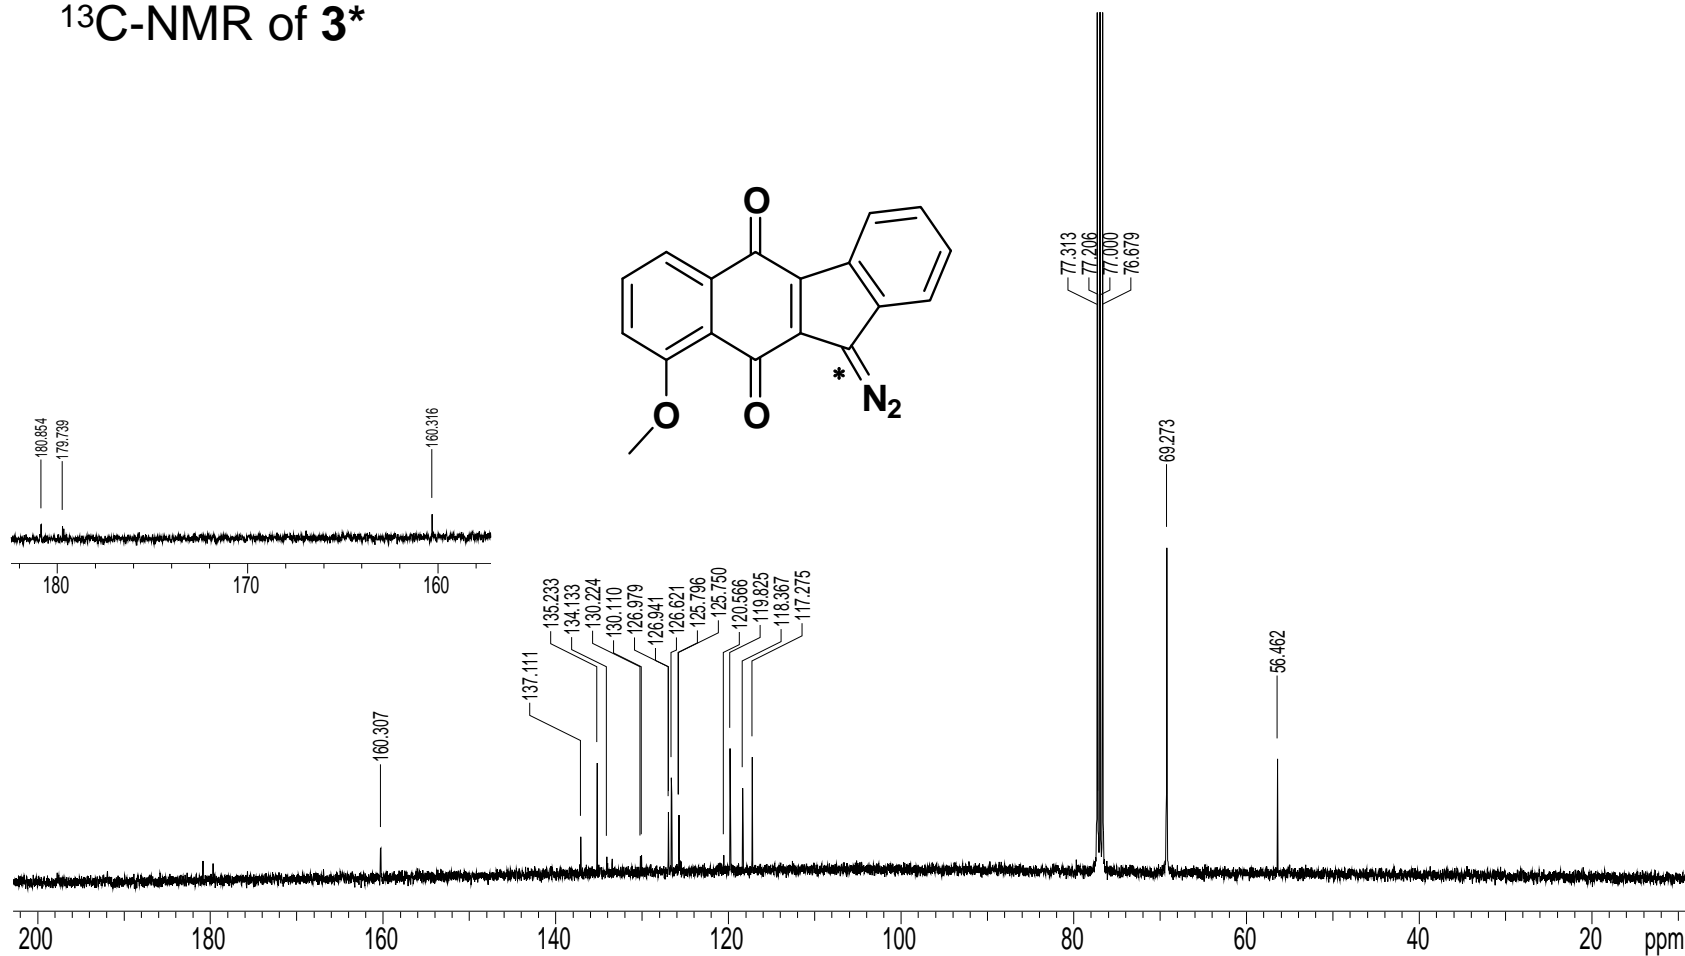



File: 54296 Ident: 50\_60 SMO(1,7) PKD(7,4,7,0.00%,0.0,65.00%,F,F) SPEC(Heights, Centroid) Acq: 31-OCT-2006 14:36:38 +11:11 >  
AutoSpecEToFPPD FAB+ Voltage BpI: 2470752 TIC: 213505360 Flags: NORM  
File Text: Khmour/Skibo ; omk-81-100 ; HRFAB

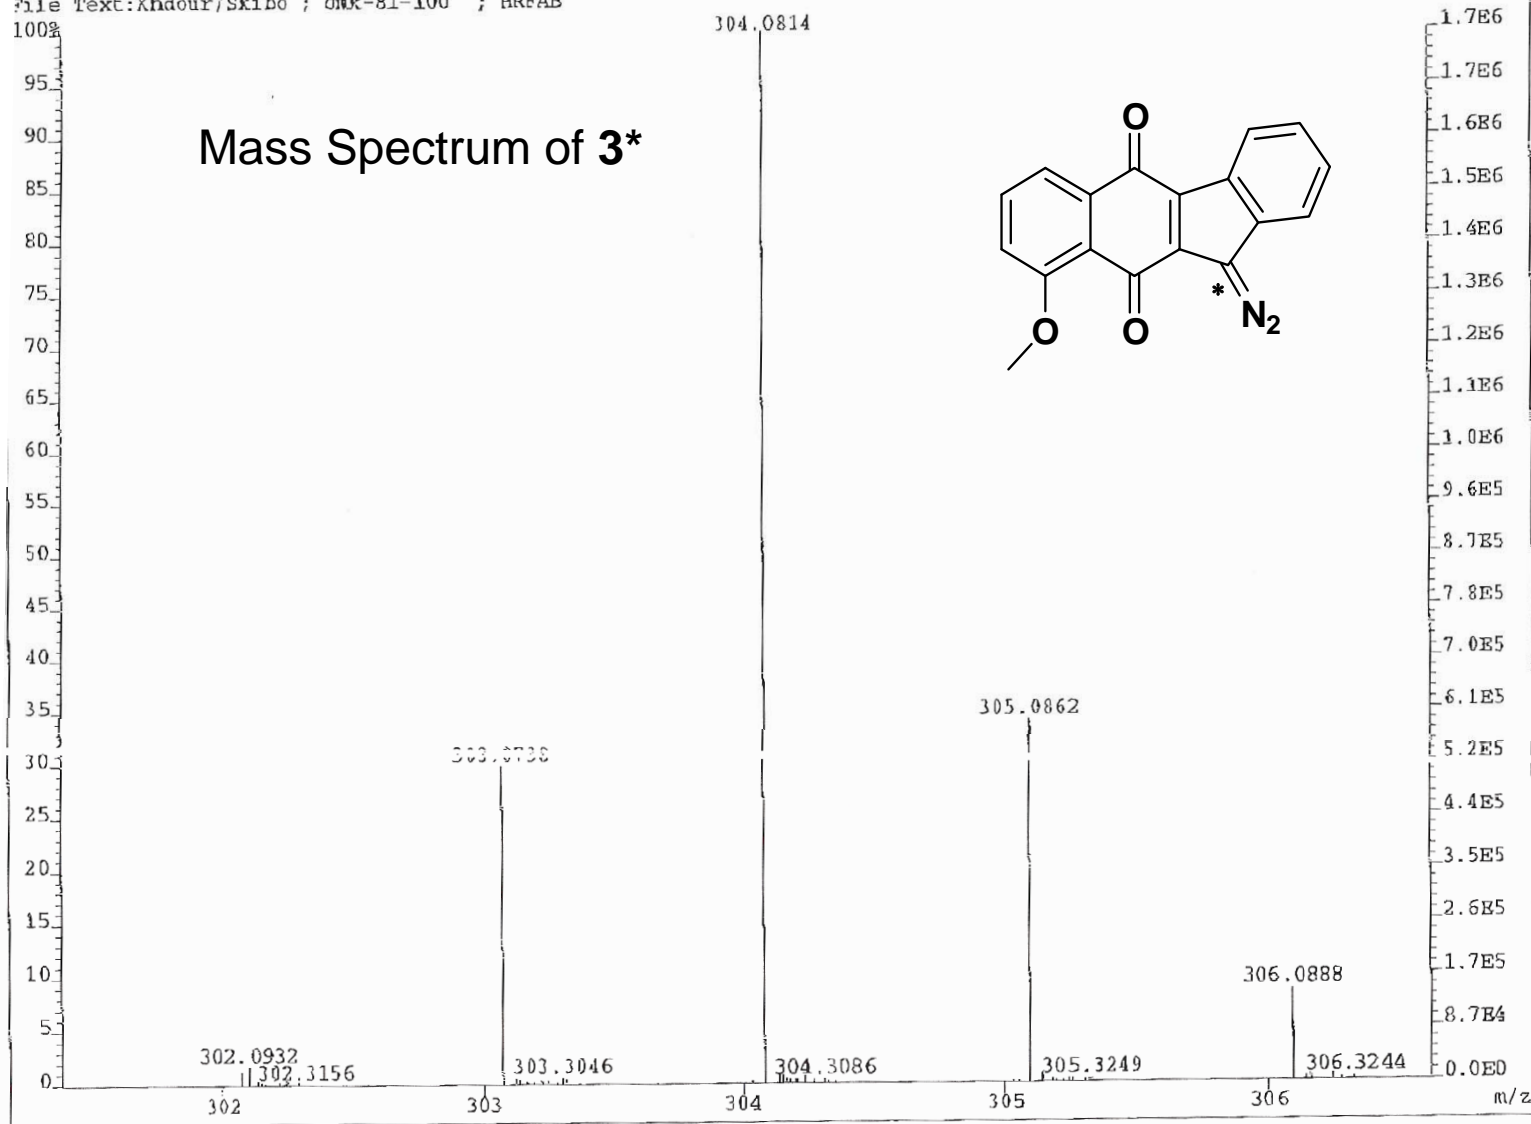

File:54256C Ident:32\_41 SMO(1,11) Acq:24-OCT-2006 15:34:09 +8:17 Cal:SERCAL102406  
AutoSpecETOFPPD FAB+ Magnet BpI:2643712 TIC:522632160  
File Text:Khgour/Skibo ; omk-81-100 ; LRFAB pos ion, matrix: 3-nba

### Mass Spectrum of 3\*

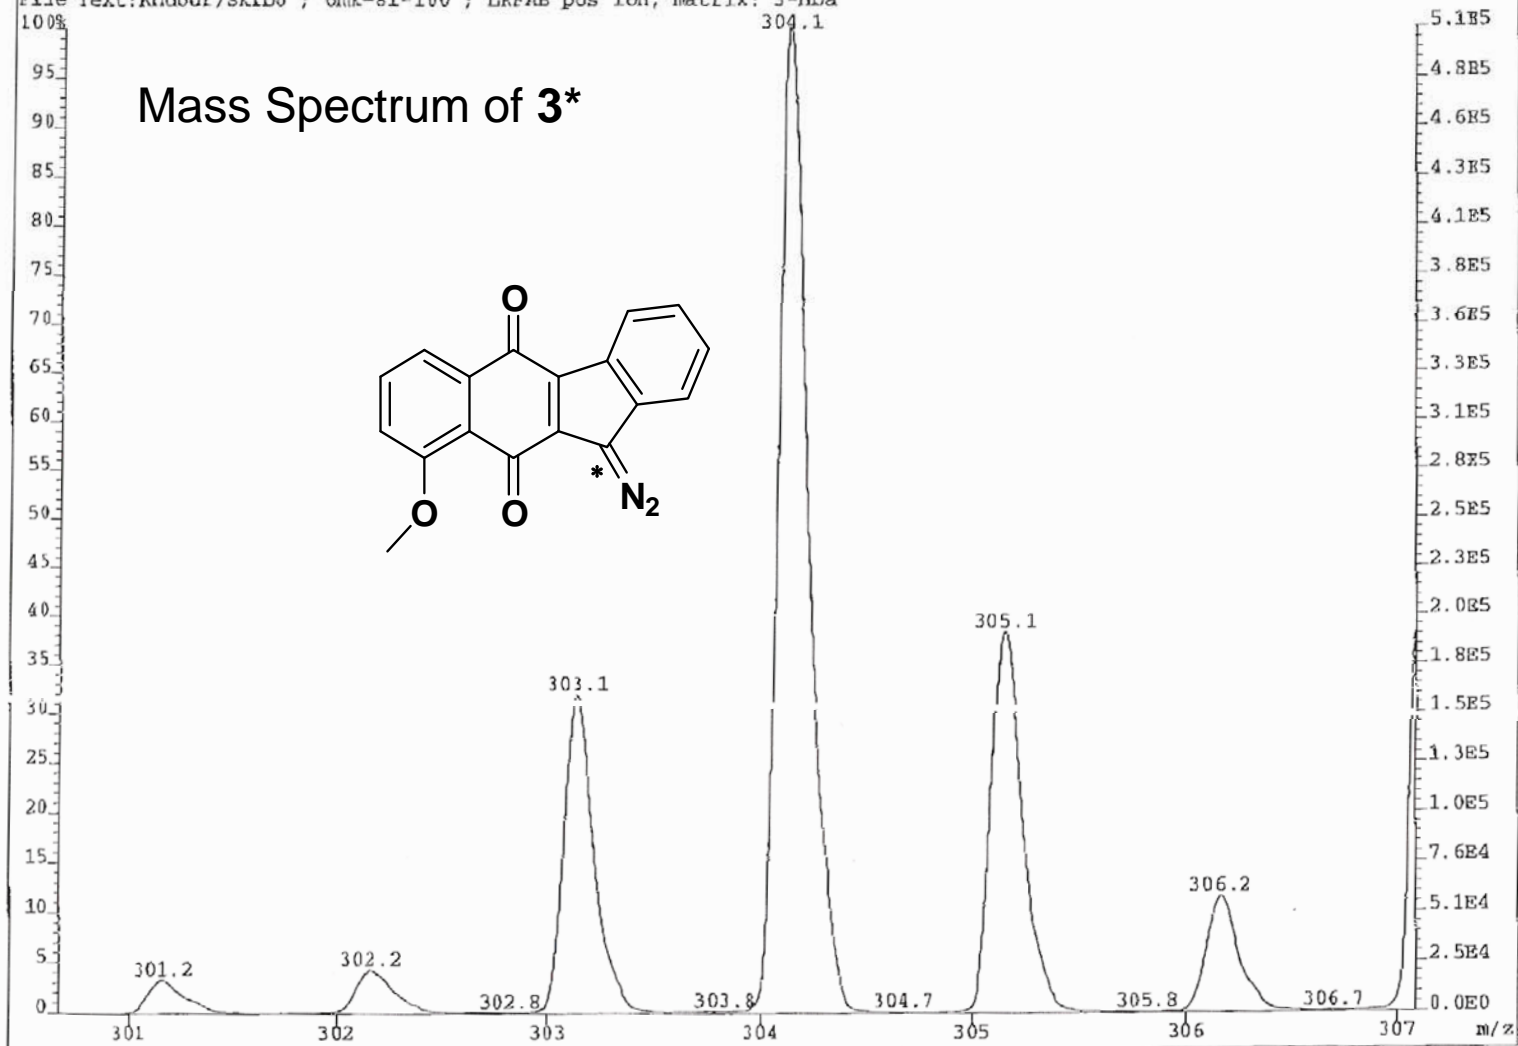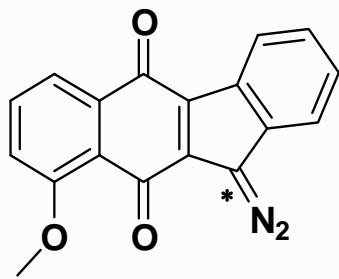

# H-NMR of 21

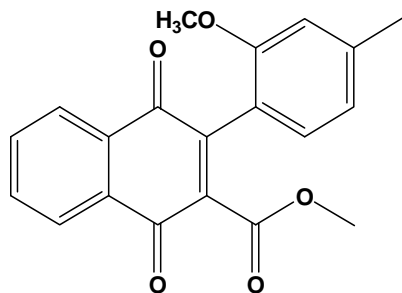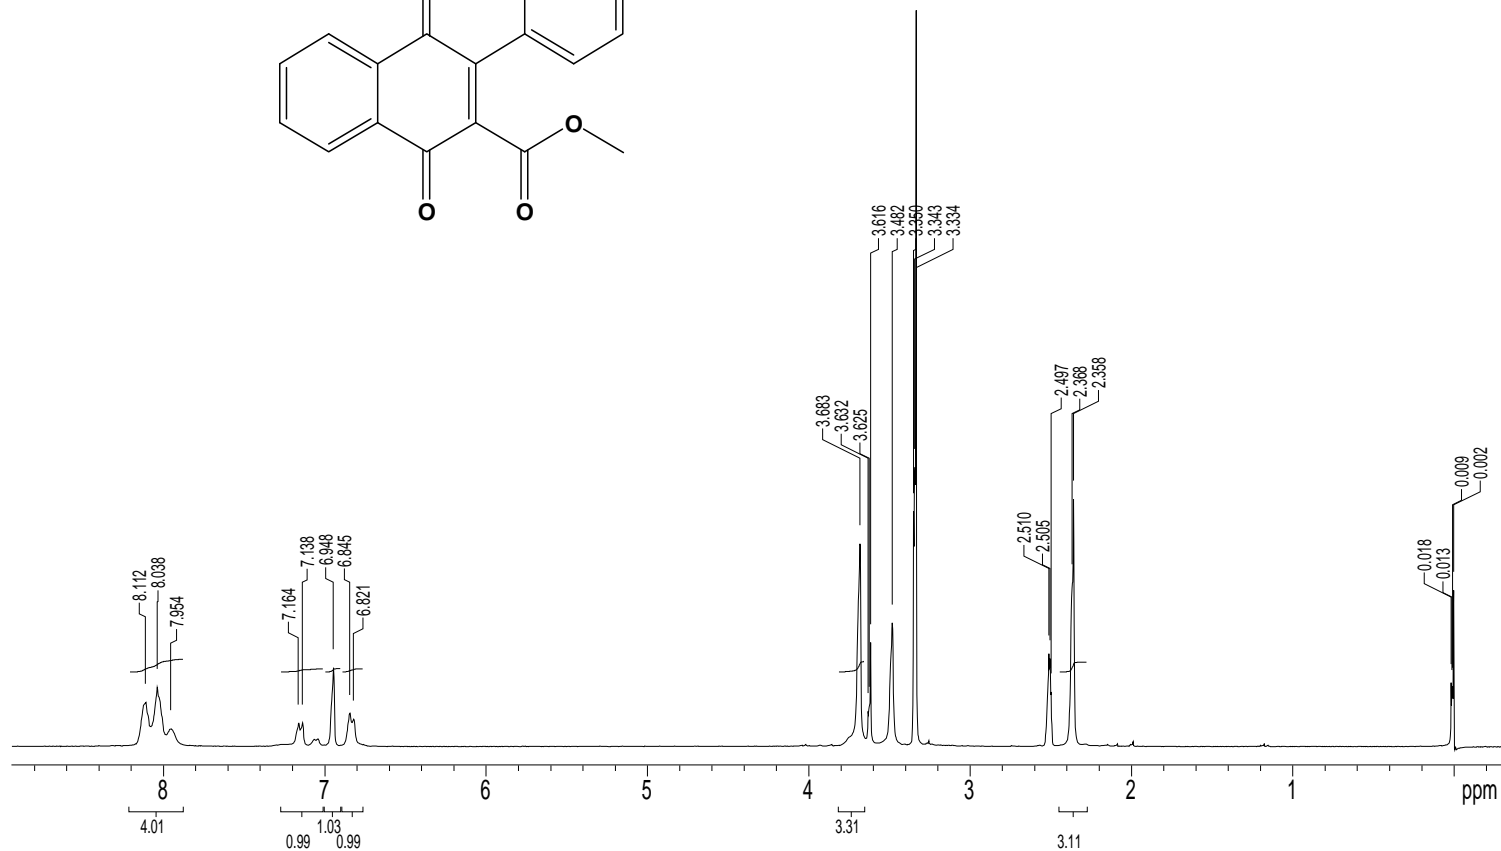

File:54343 Ident:33\_43-1\_11 Win 100FPM Acq: 9-NOV-2006 16:48:35 +8:07 Cal:54343  
AutoSpecTTOFFPD EI+ Magnet BpM:149 EpI:3637097 TIC:34779260 Flags:ACC  
File Text:Khdour/Skibo ; DMK-4b ; HREI

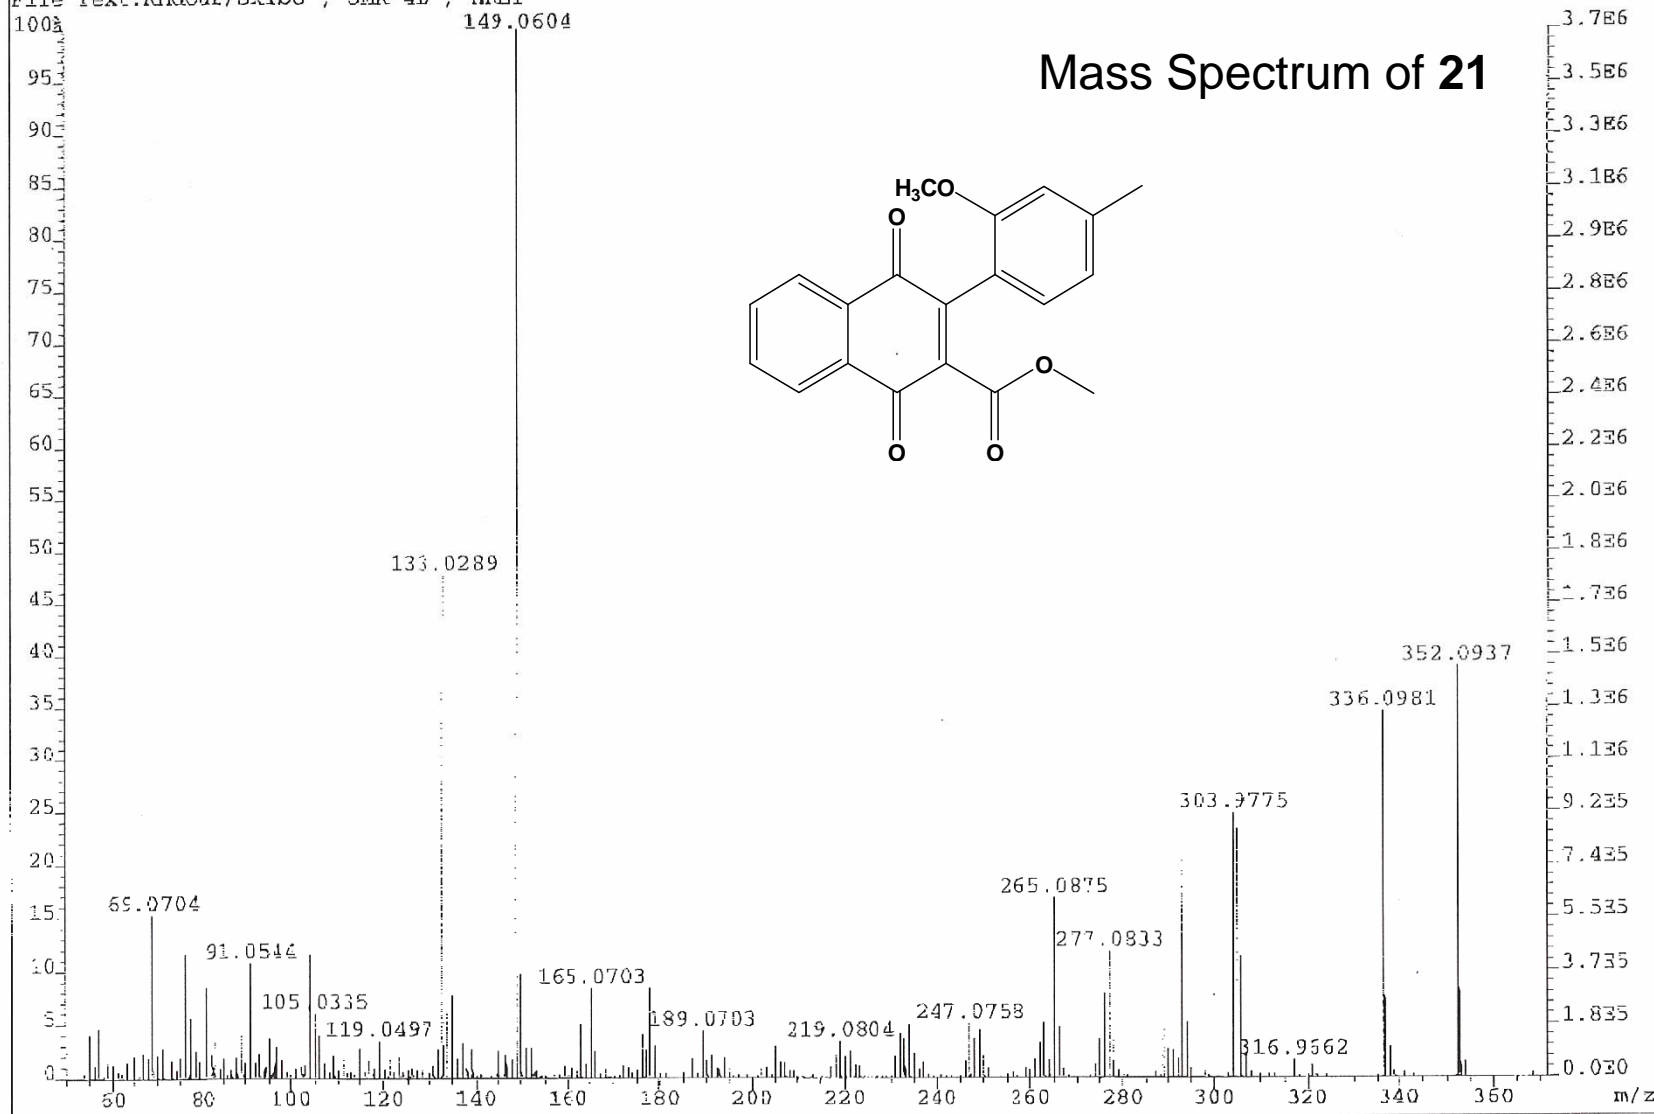

# H-NMR of 22

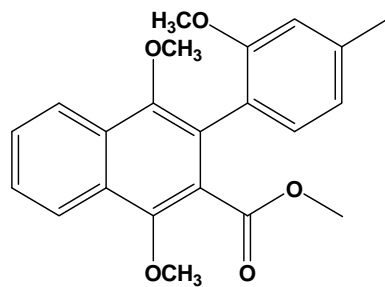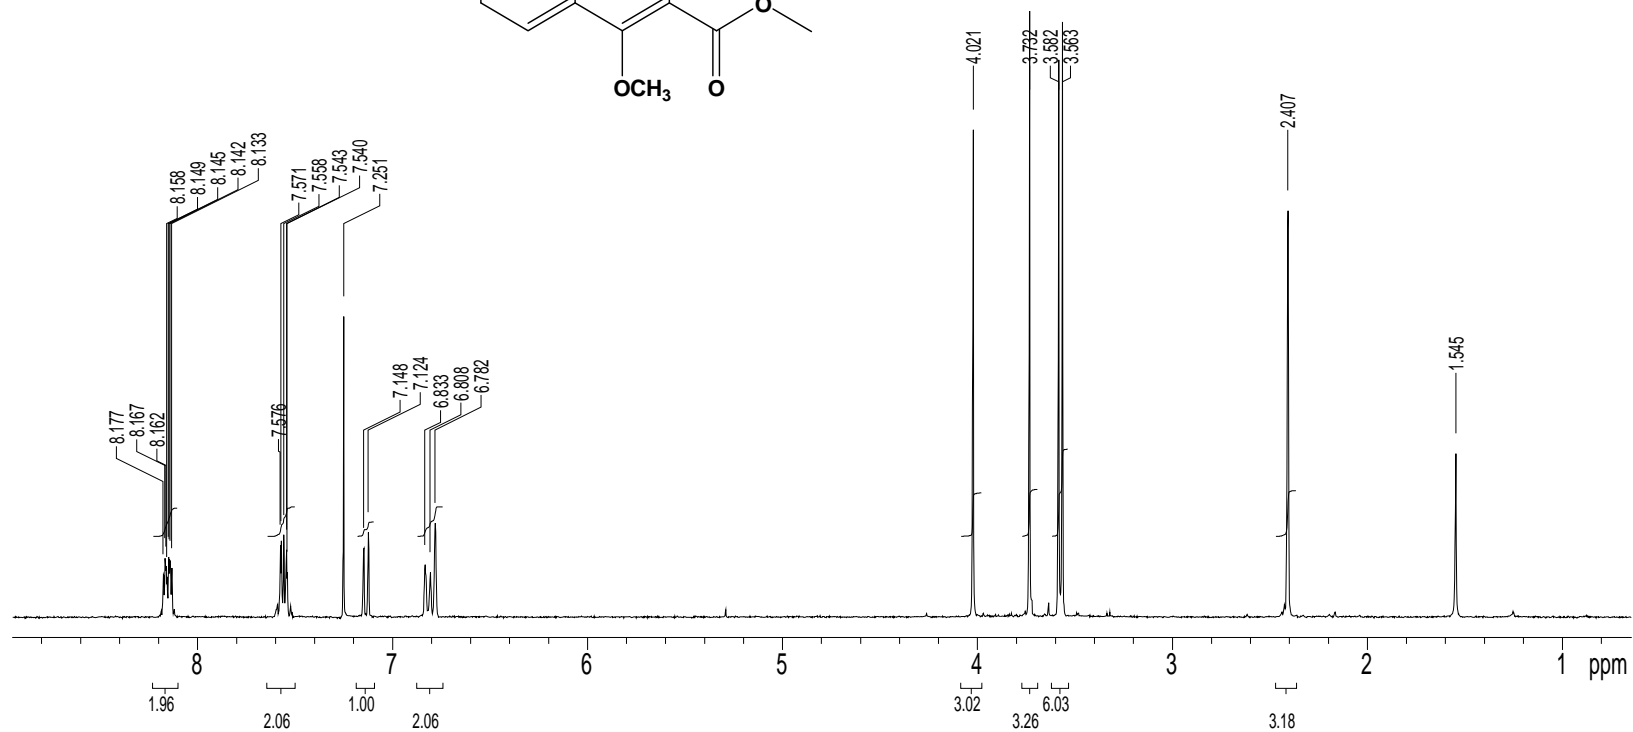

File:54344 Ident:21\_31-1\_11 Win 1003PM Acq: 9-NOV-2006 17:05:31 +5:37 Cal:54344  
AutoSpecETOFPPD EI+ Magnet BpM:366 SpI:2274283 TIC:17260016 Flags:ACC  
File Text:Khdour/Skibo ; OMK-4a ; HRRT

## Mass Spectrum of 22

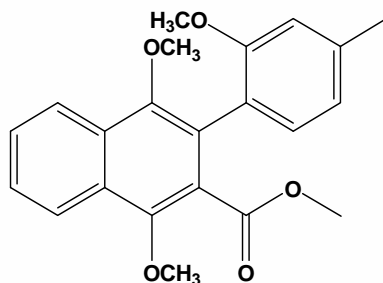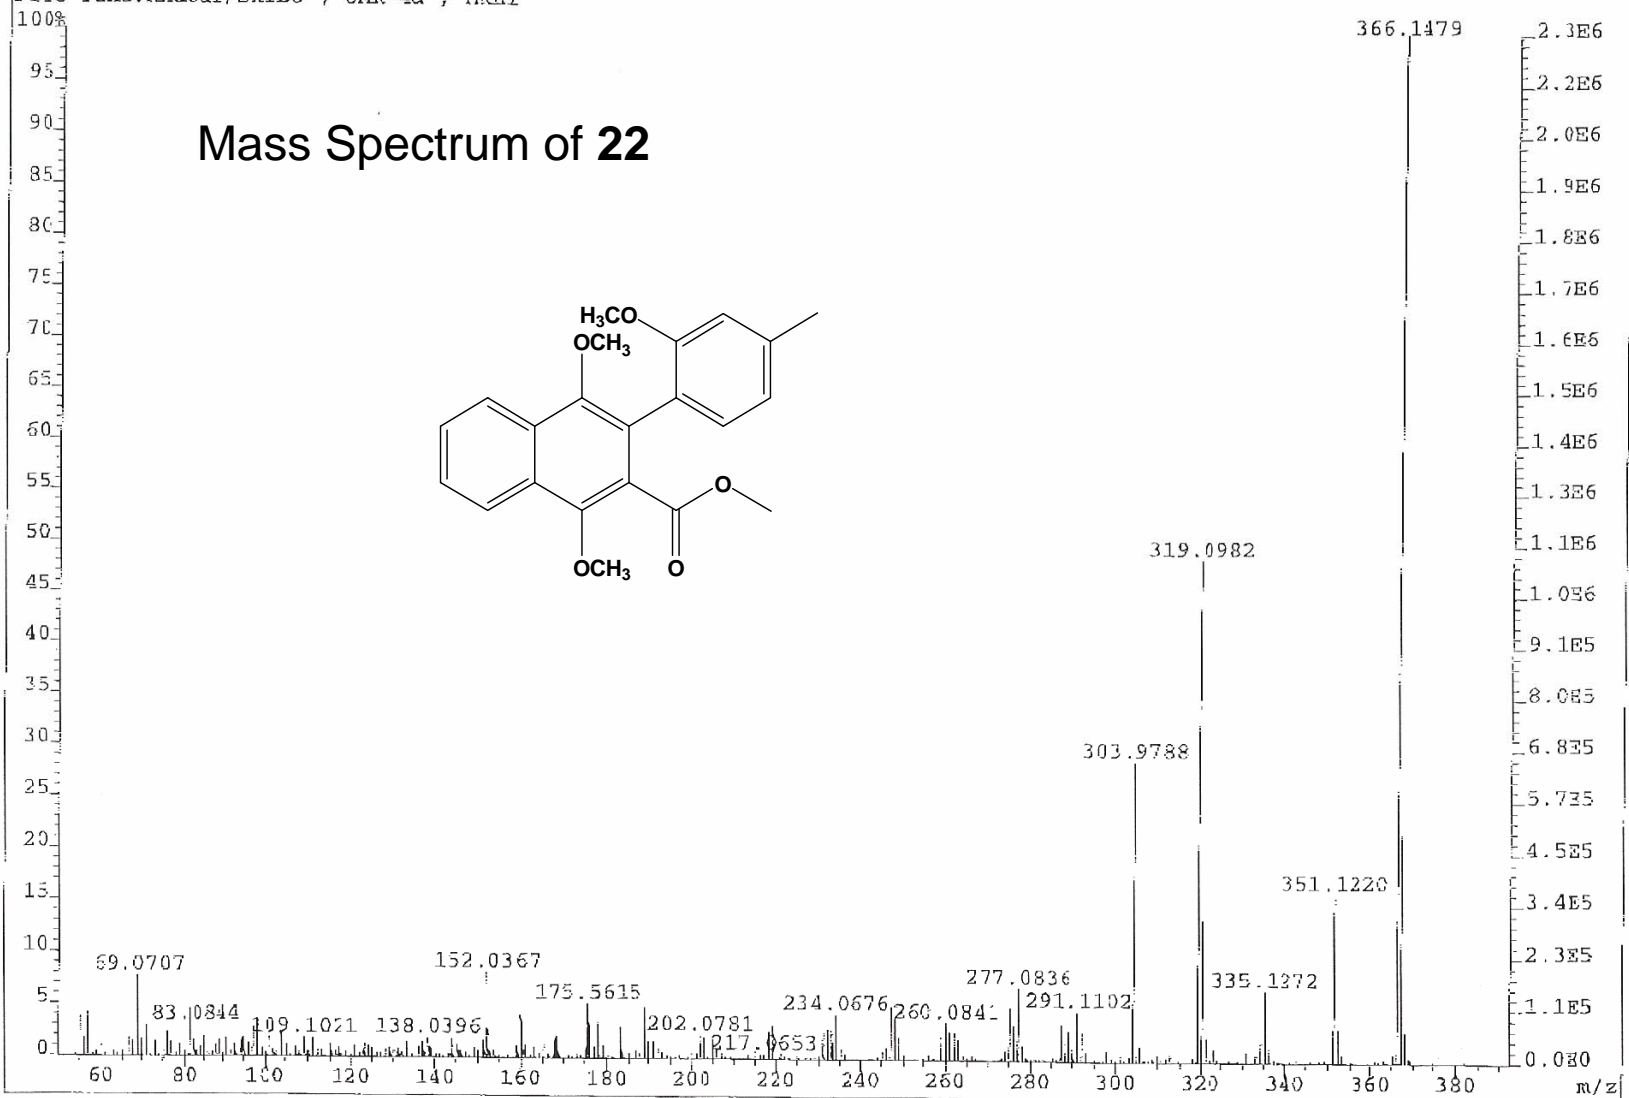

# H-NMR of 23

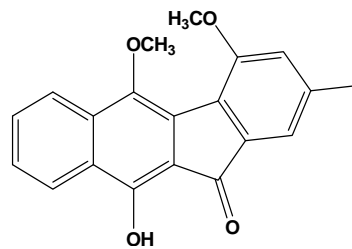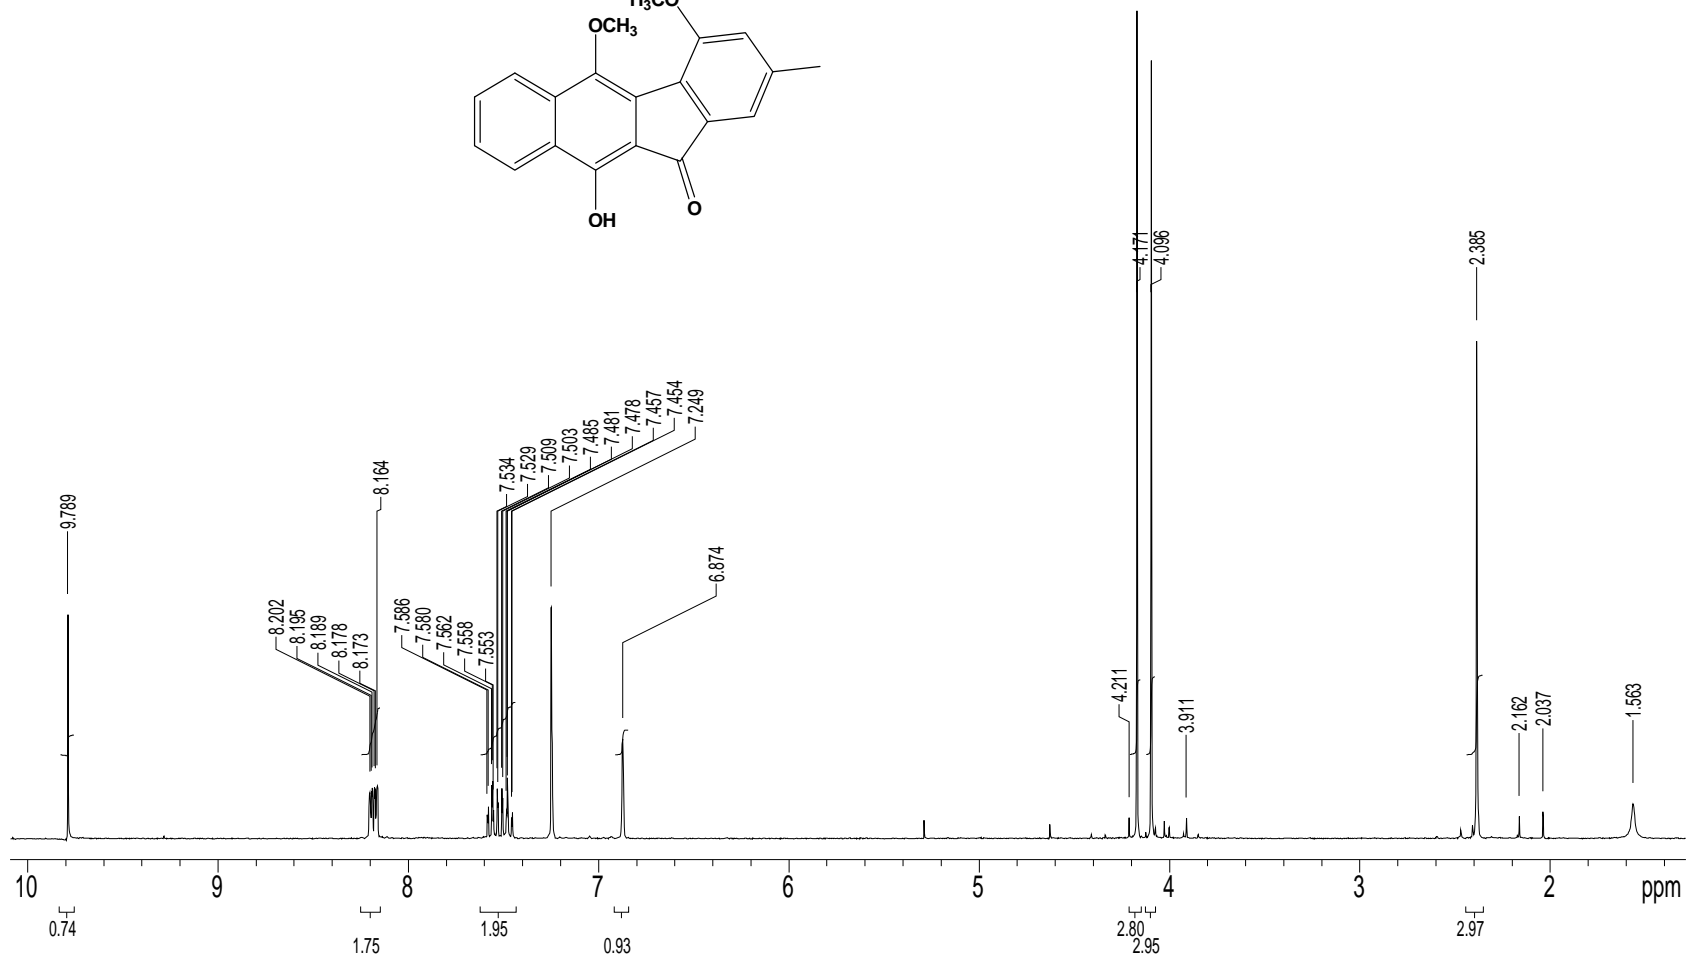

# <sup>13</sup>C-NMR of 23

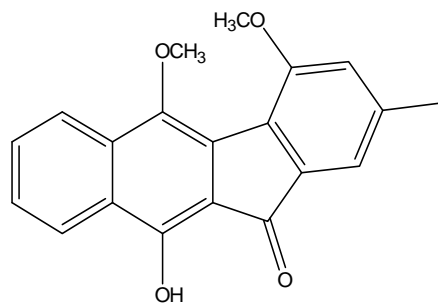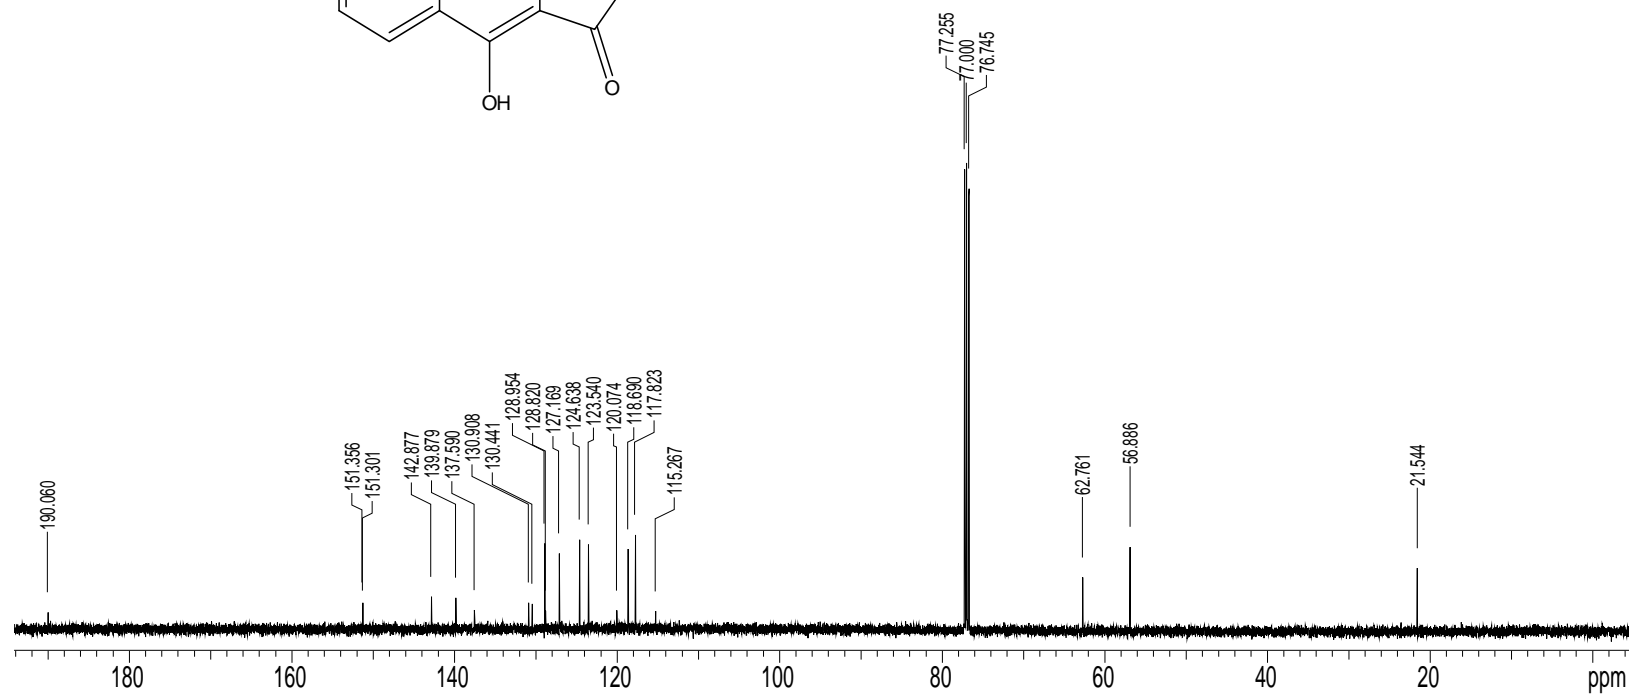



File:54345 Ident:14\_24-1\_10 Win 100PPM Acq: 9-NOV-2006 17:14:55 +4:10 Cal:54345  
AutoSpec3TOFFPD EI+ Magnet BpM:320 SpI:1140096 TIC:18667116 Flags:ACC  
File Tex::Khdour/Skibo ; OMK-4c ; HRBI

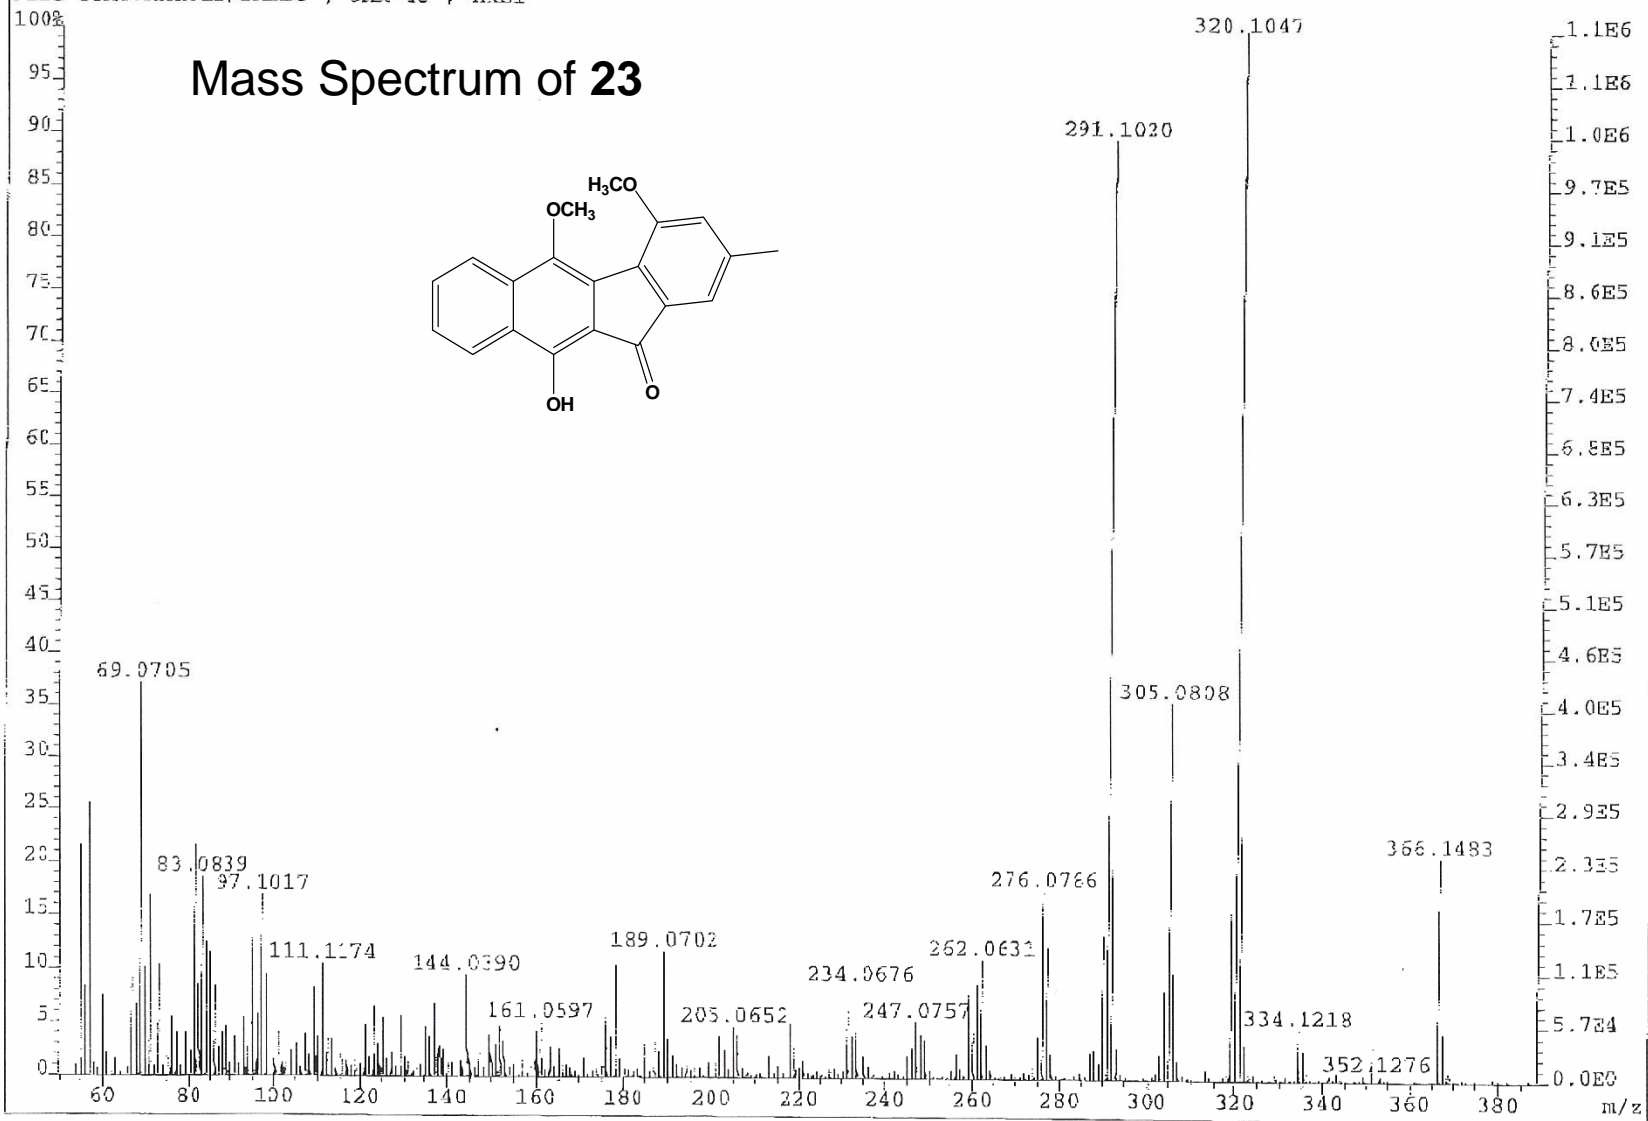

# H-NMR of 4

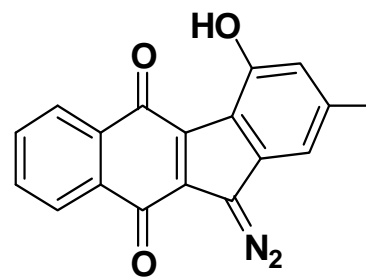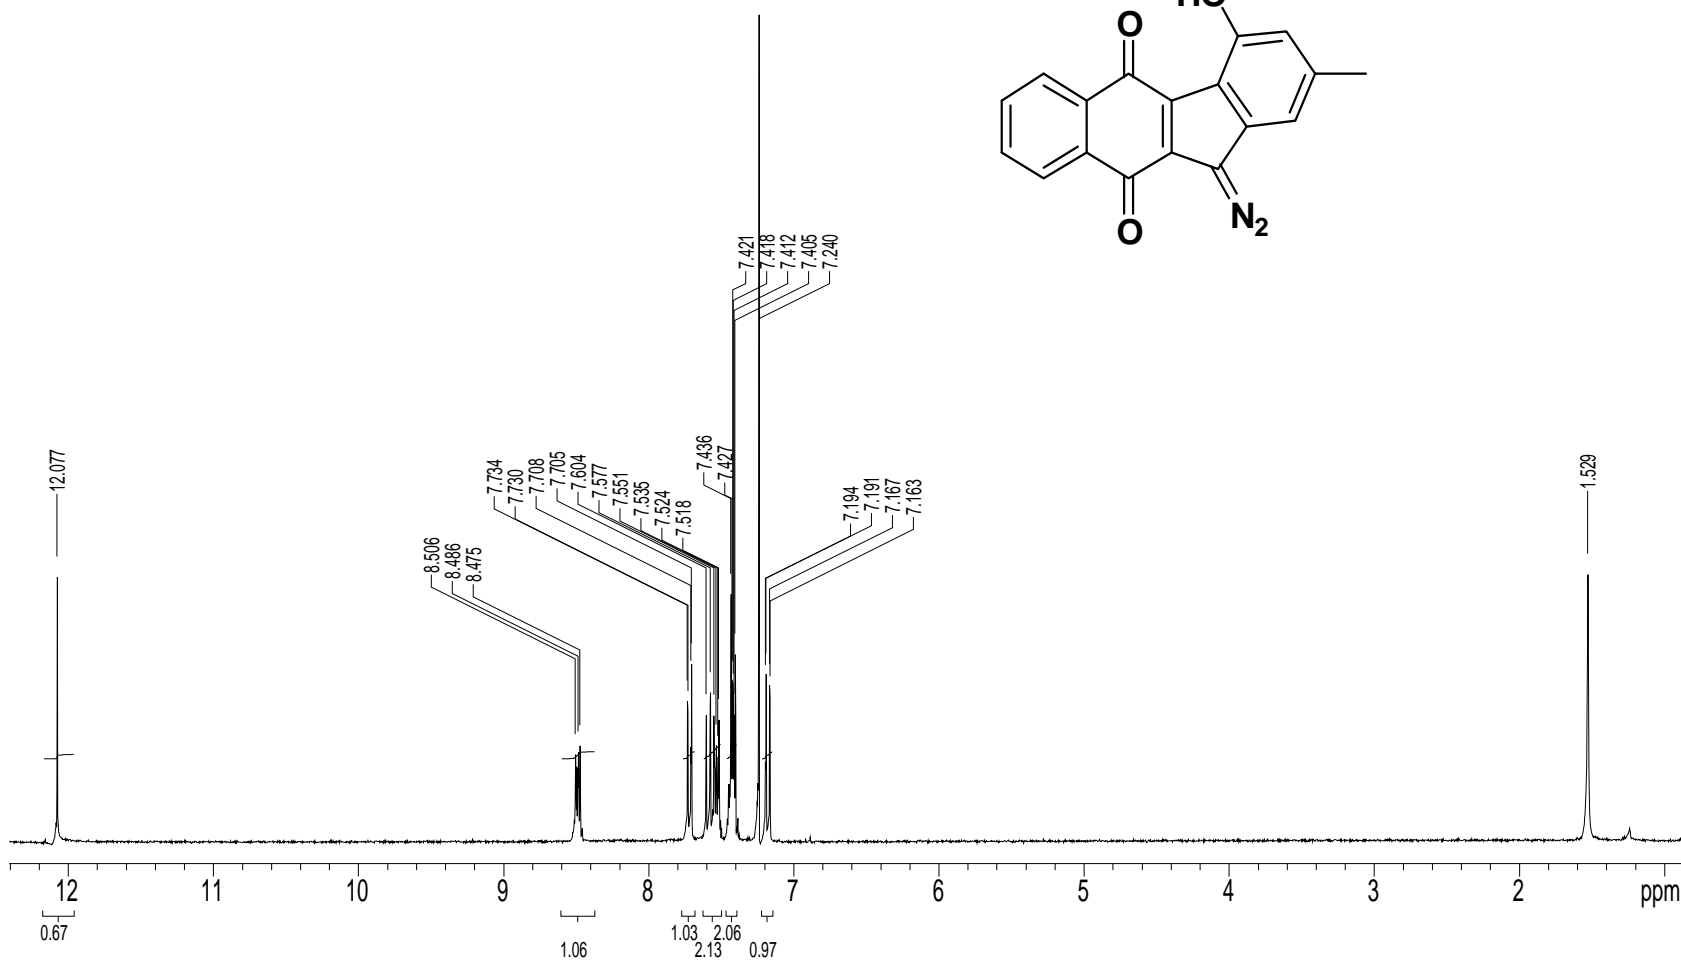

# H-NMR of 4

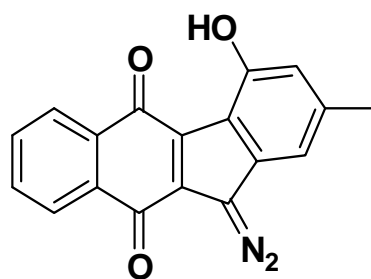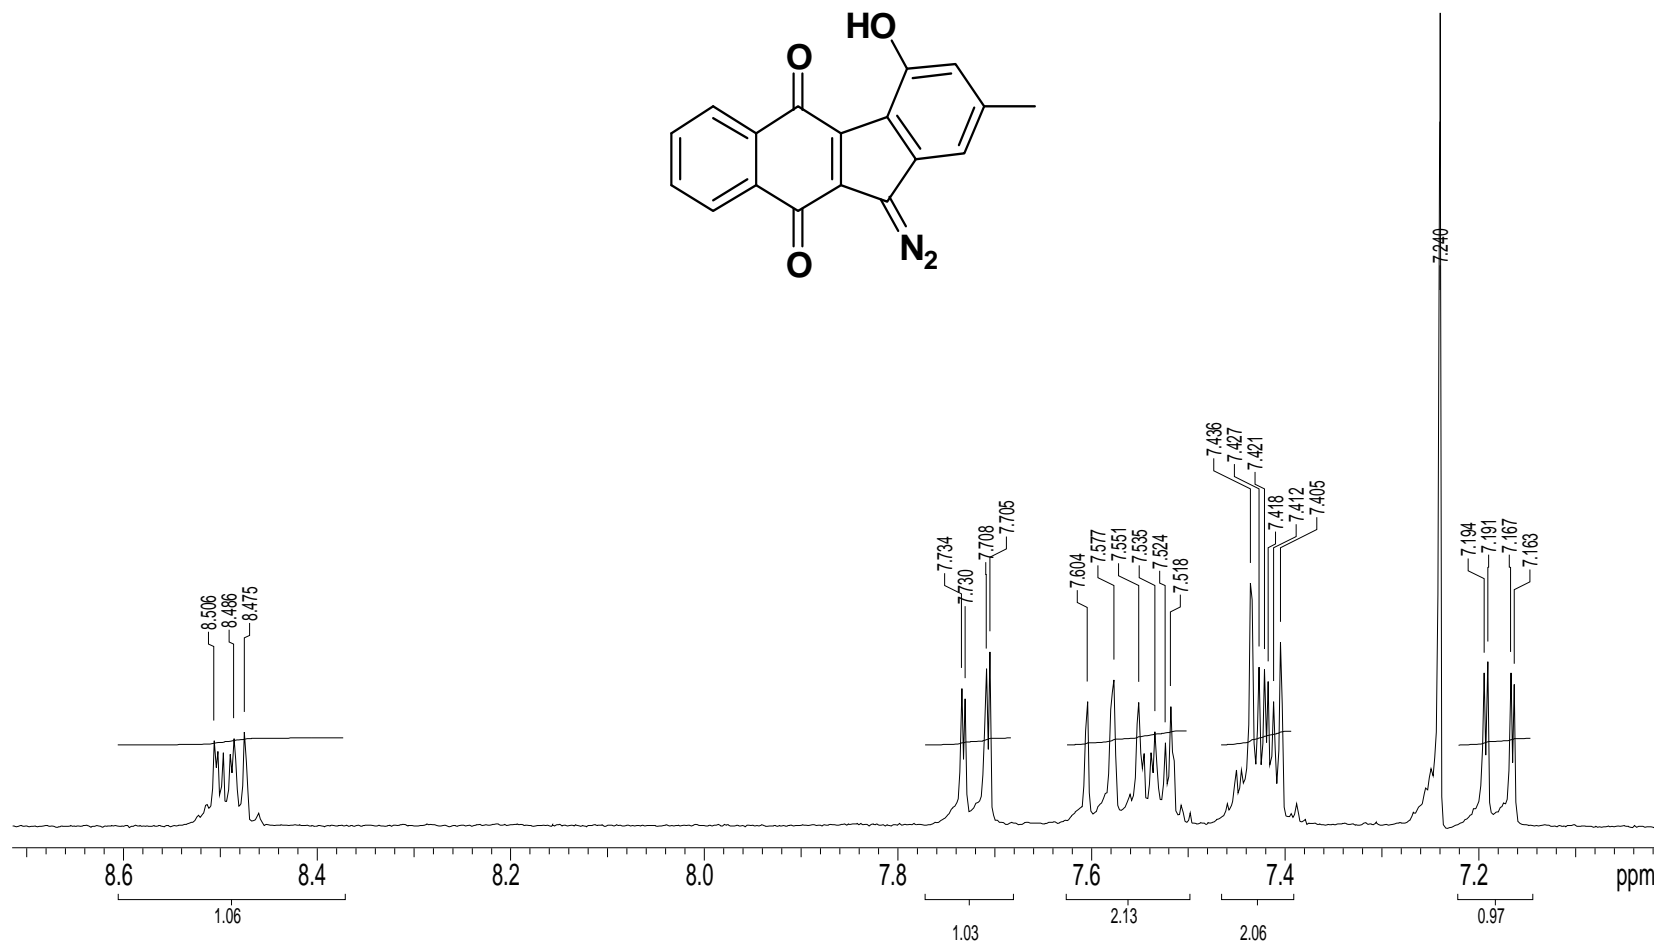

File:53934 Ident:17\_27-1\_11 Win 100PEM Acq:18-MAY-2006 13:47:15 +4:49 Cal:53934  
AutoSpecETOPFFD EI+ Magnet BpM:274 BpI:154963 TIC:1419441 Flags:ACC  
File Text:Khfour/Skibo ; omk-k7 ; HREI

### Mass Spectrum of 4

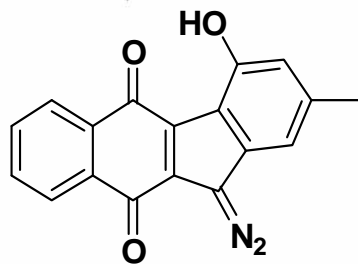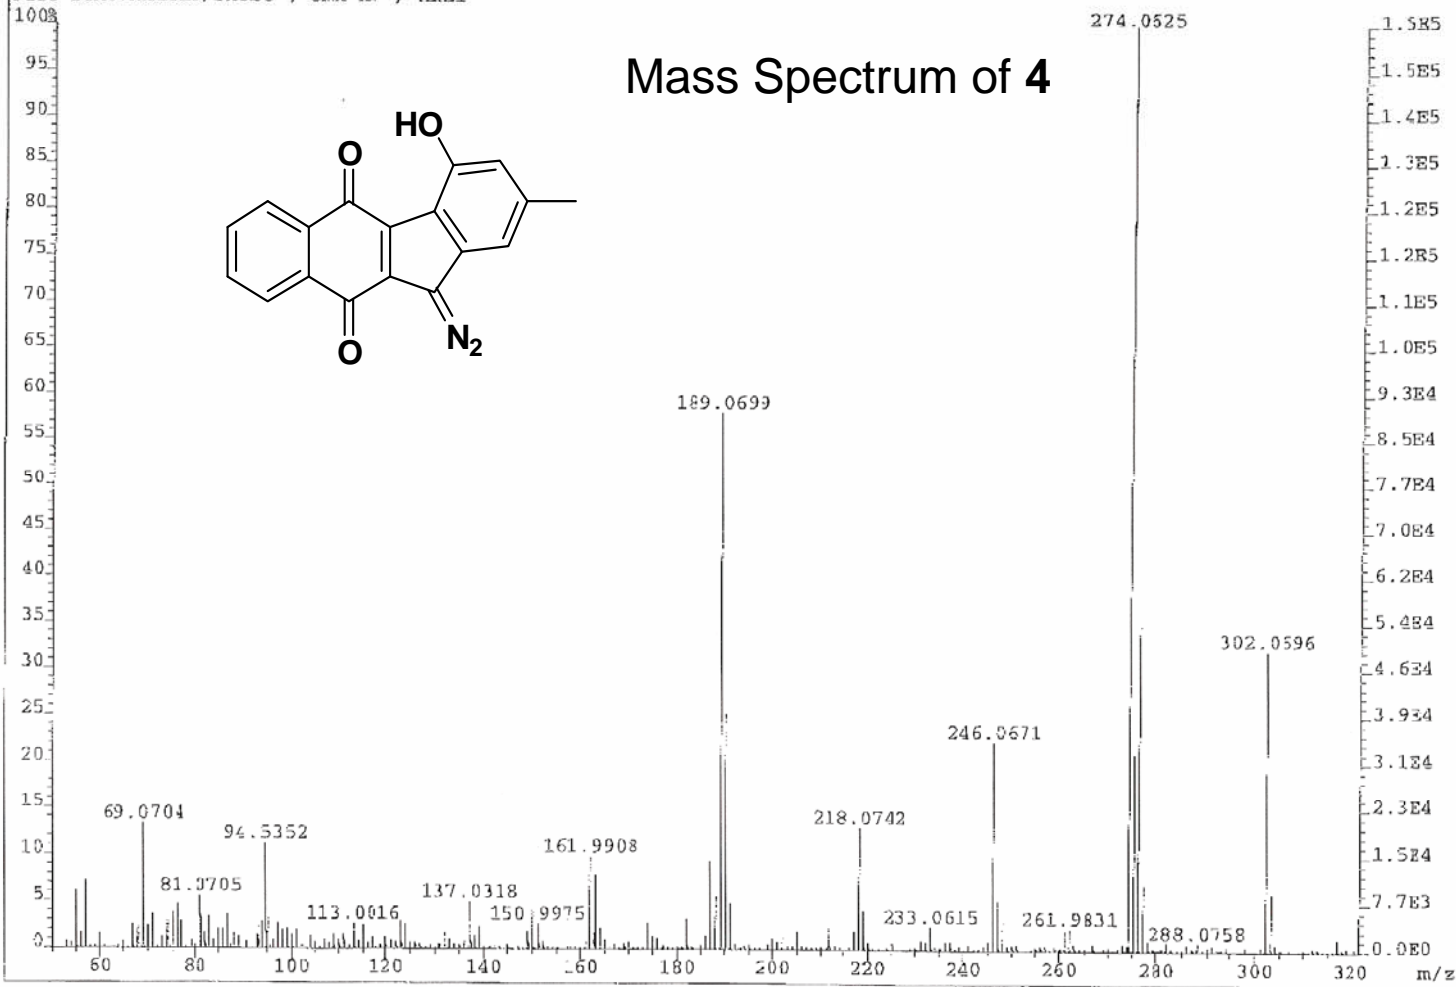

# H-NMR of 5

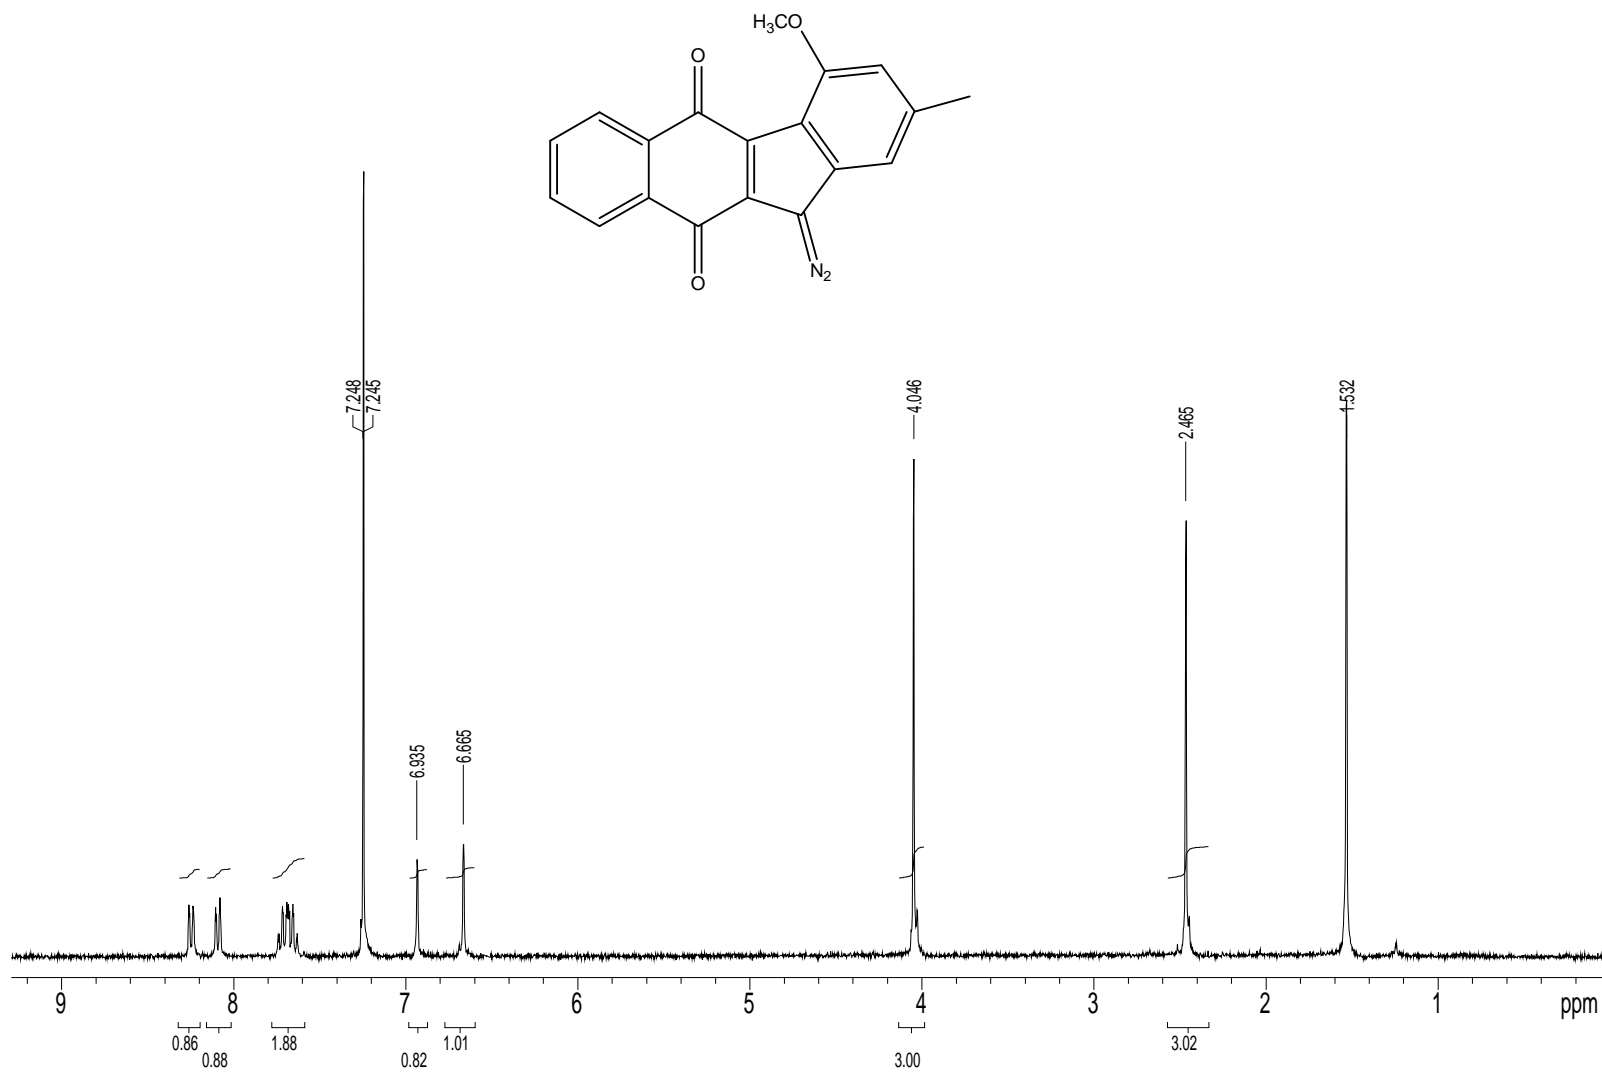

File:54519 Ident:15\_25-1\_8 Win 100PPM Acq:3C-JAN-2007 15:32:34 +4:21 Cal:54519  
AutoSpecTOFFPD EI+ Magnet BpX:69 BpI:1100199 TIC:17542212 Flags:ACC  
File Text:Khdour/Skibo ; OMK-y ; HREI

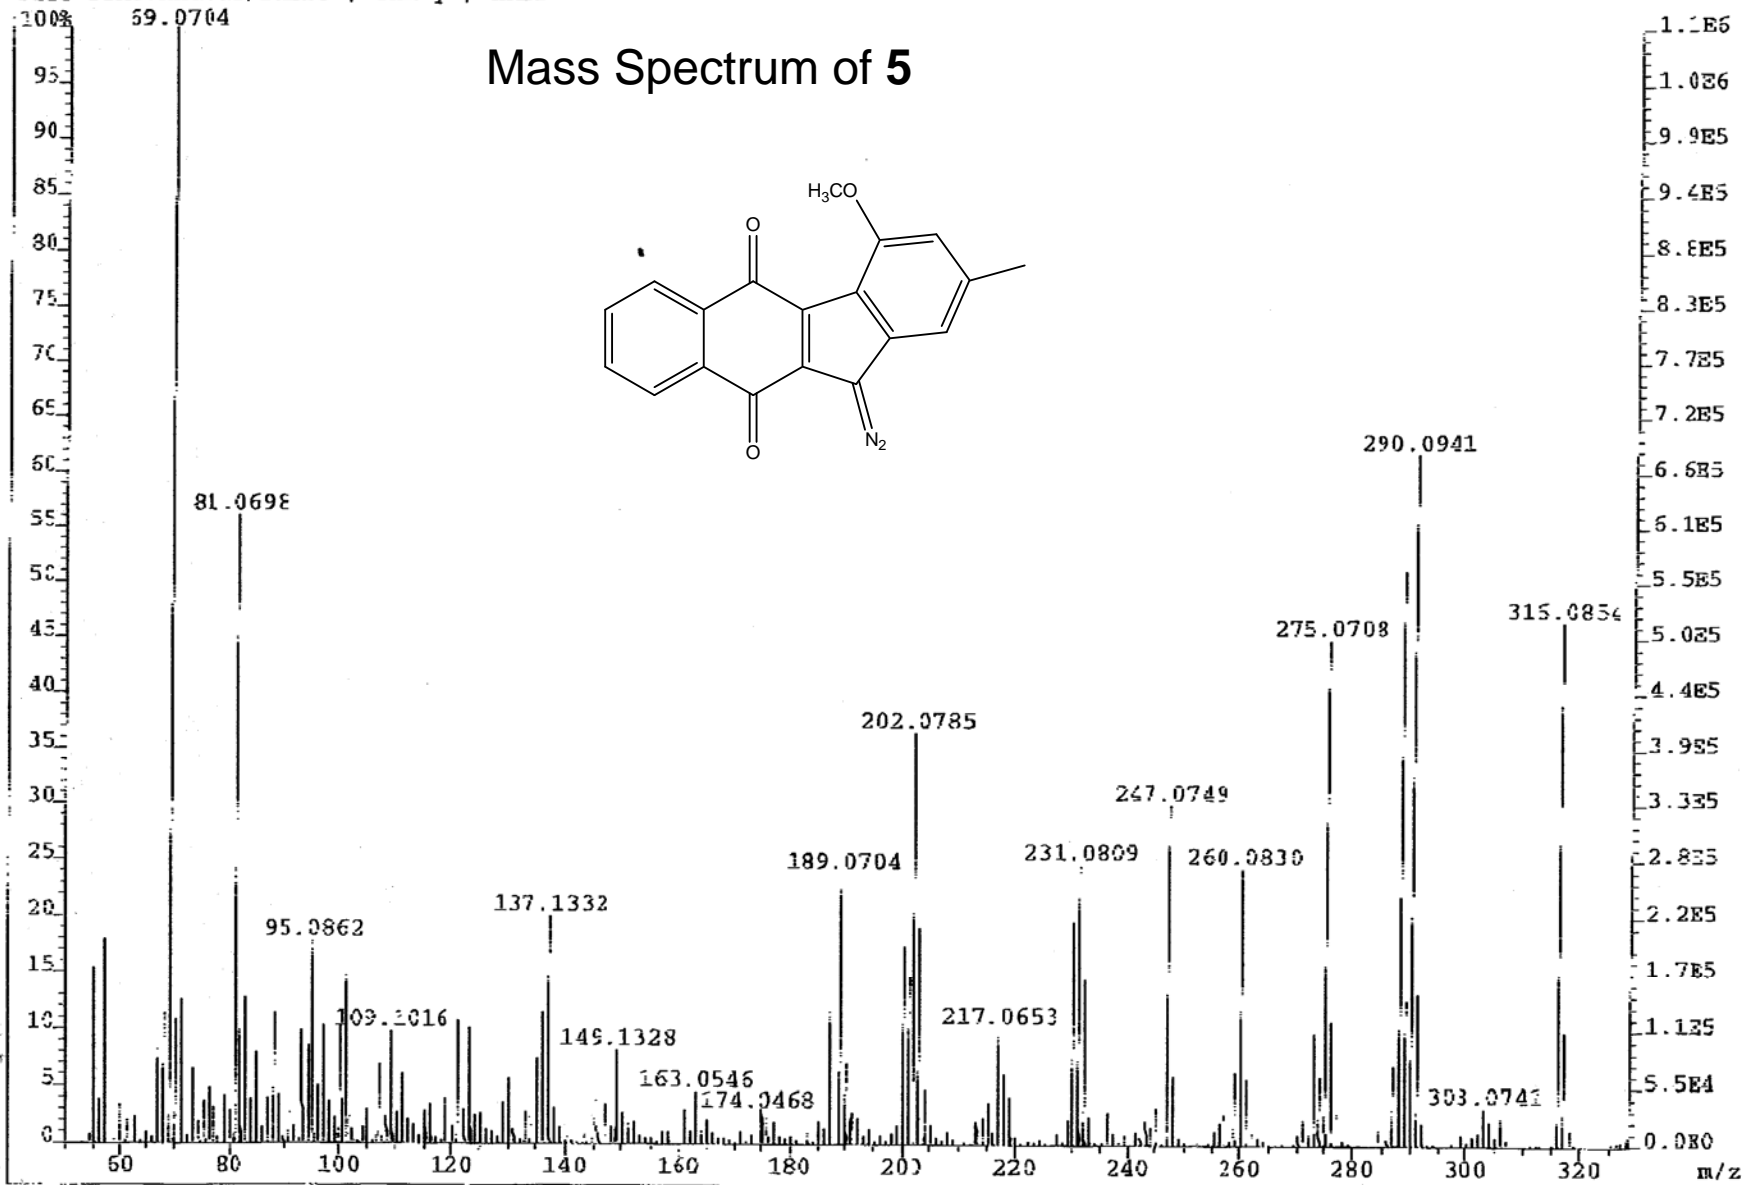

$^{13}\text{C}$ -NMR of 6\*

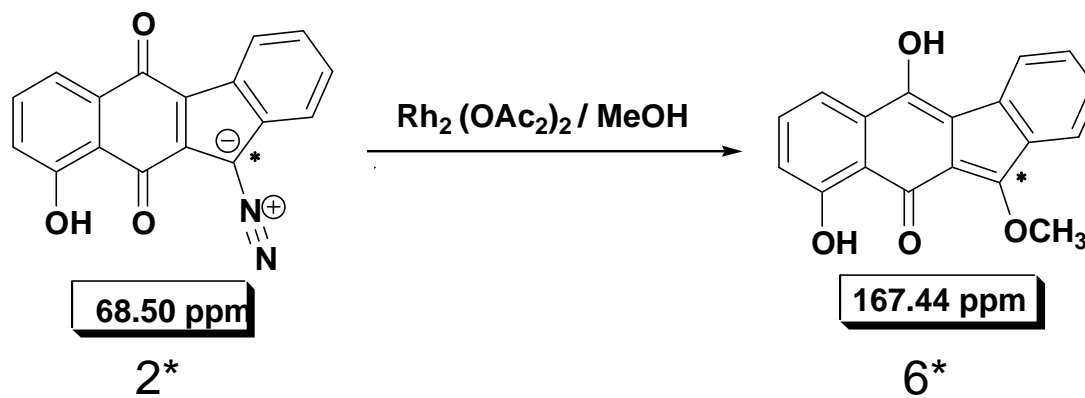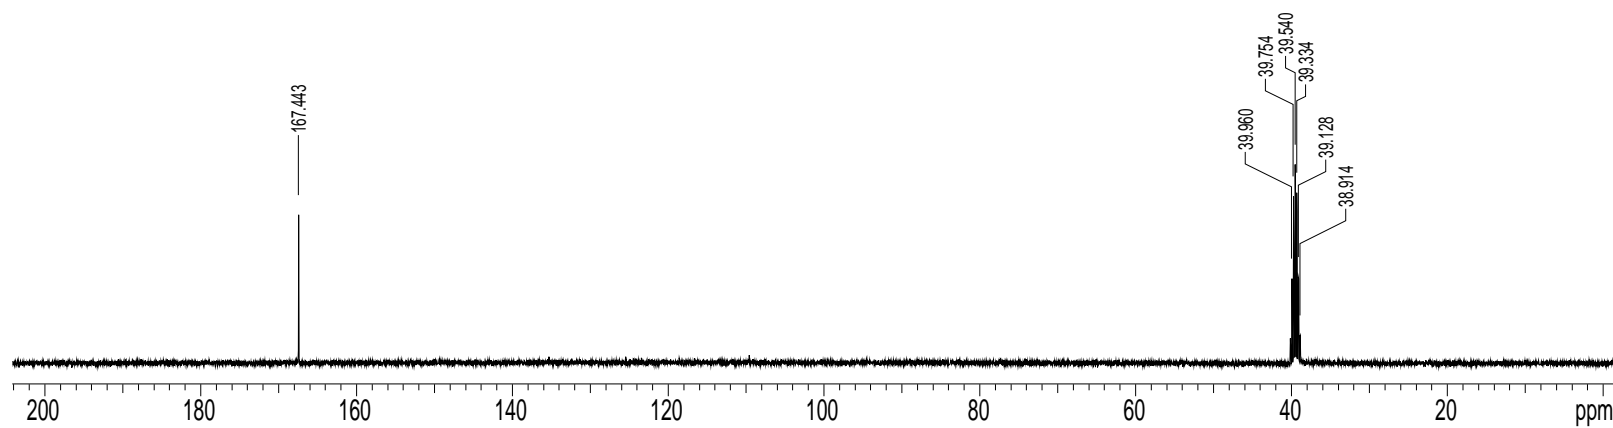

# H-NMR of 6\*

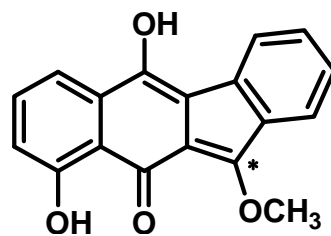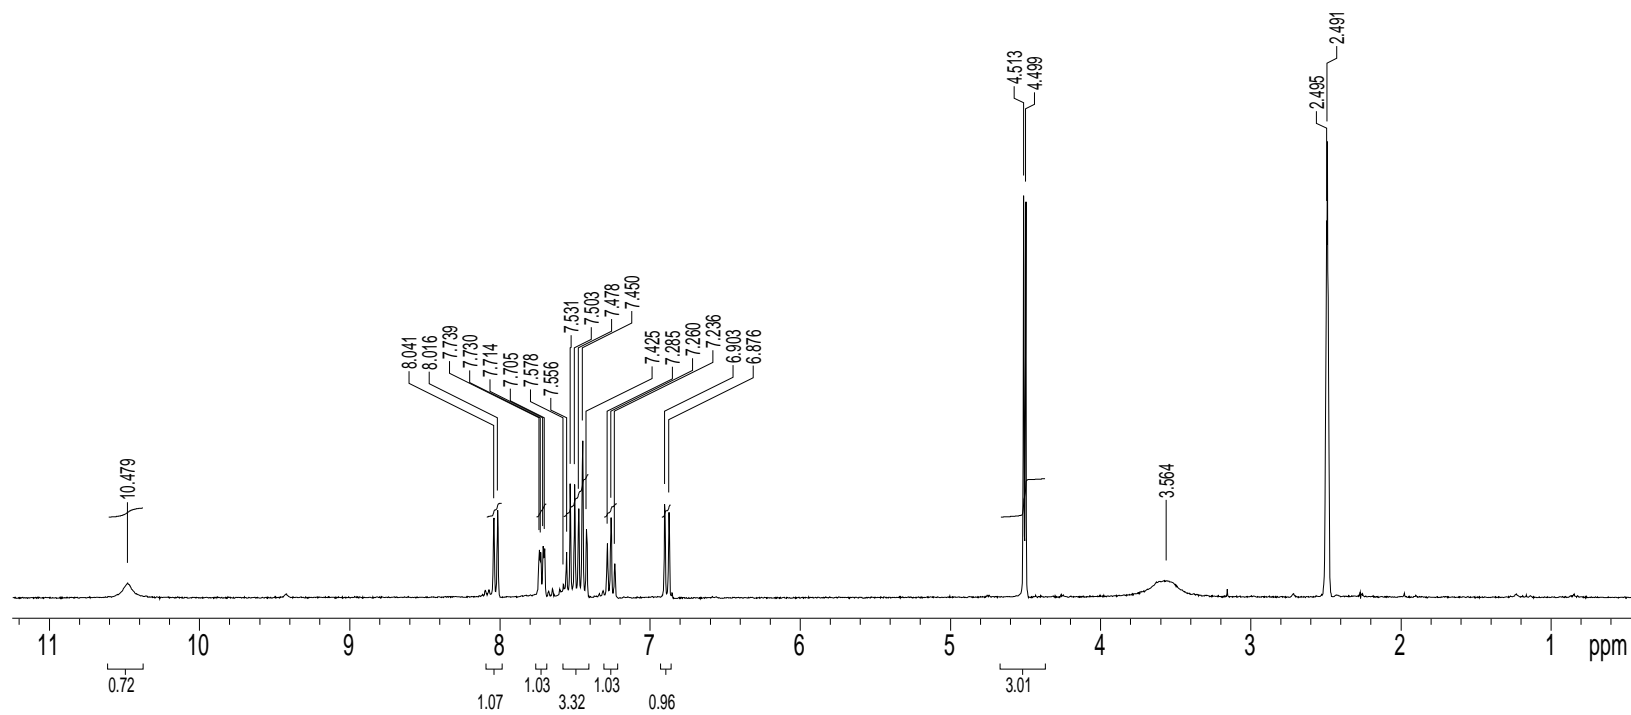



AutoSpecETOFPPD EI+ Magnet BpM:264 BpI:843020 TIC:5477927 Flags:ACC  
File Text:Khfour/Skibo ; cmk-81-82 ; HREI

# Mass Spectrum of 6\*

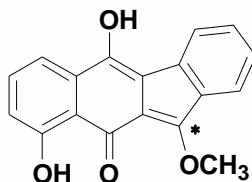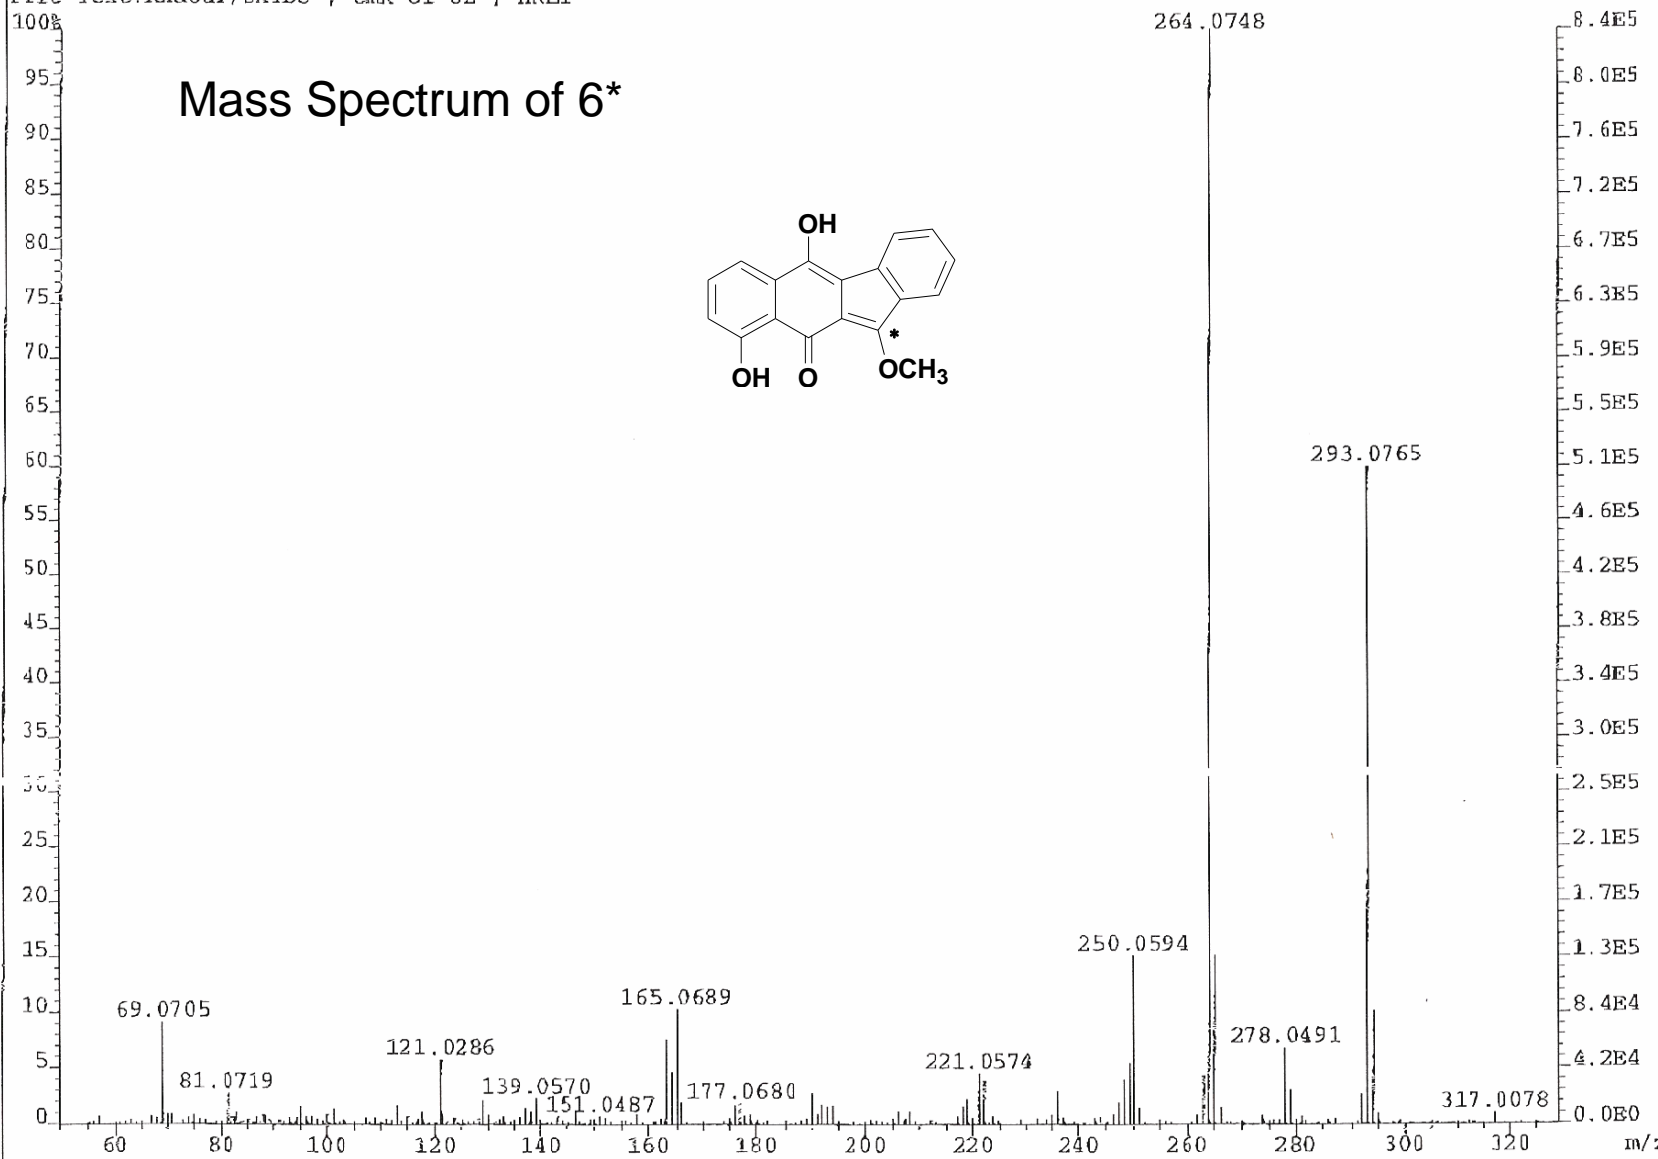

File: 54125B Ident: 21\_31-1\_8 Win 100PPM Acq: 19-SEP-2006 10:15:40 +5:37 Cal: 54125B  
AutoSpecEIOPFPD EI+ Magnet EpM: 263 EpI: 588812 TIC: 8342453 Flags: ACC  
File Text: Khmour/Skibo ; amk-81-81 ; HREI

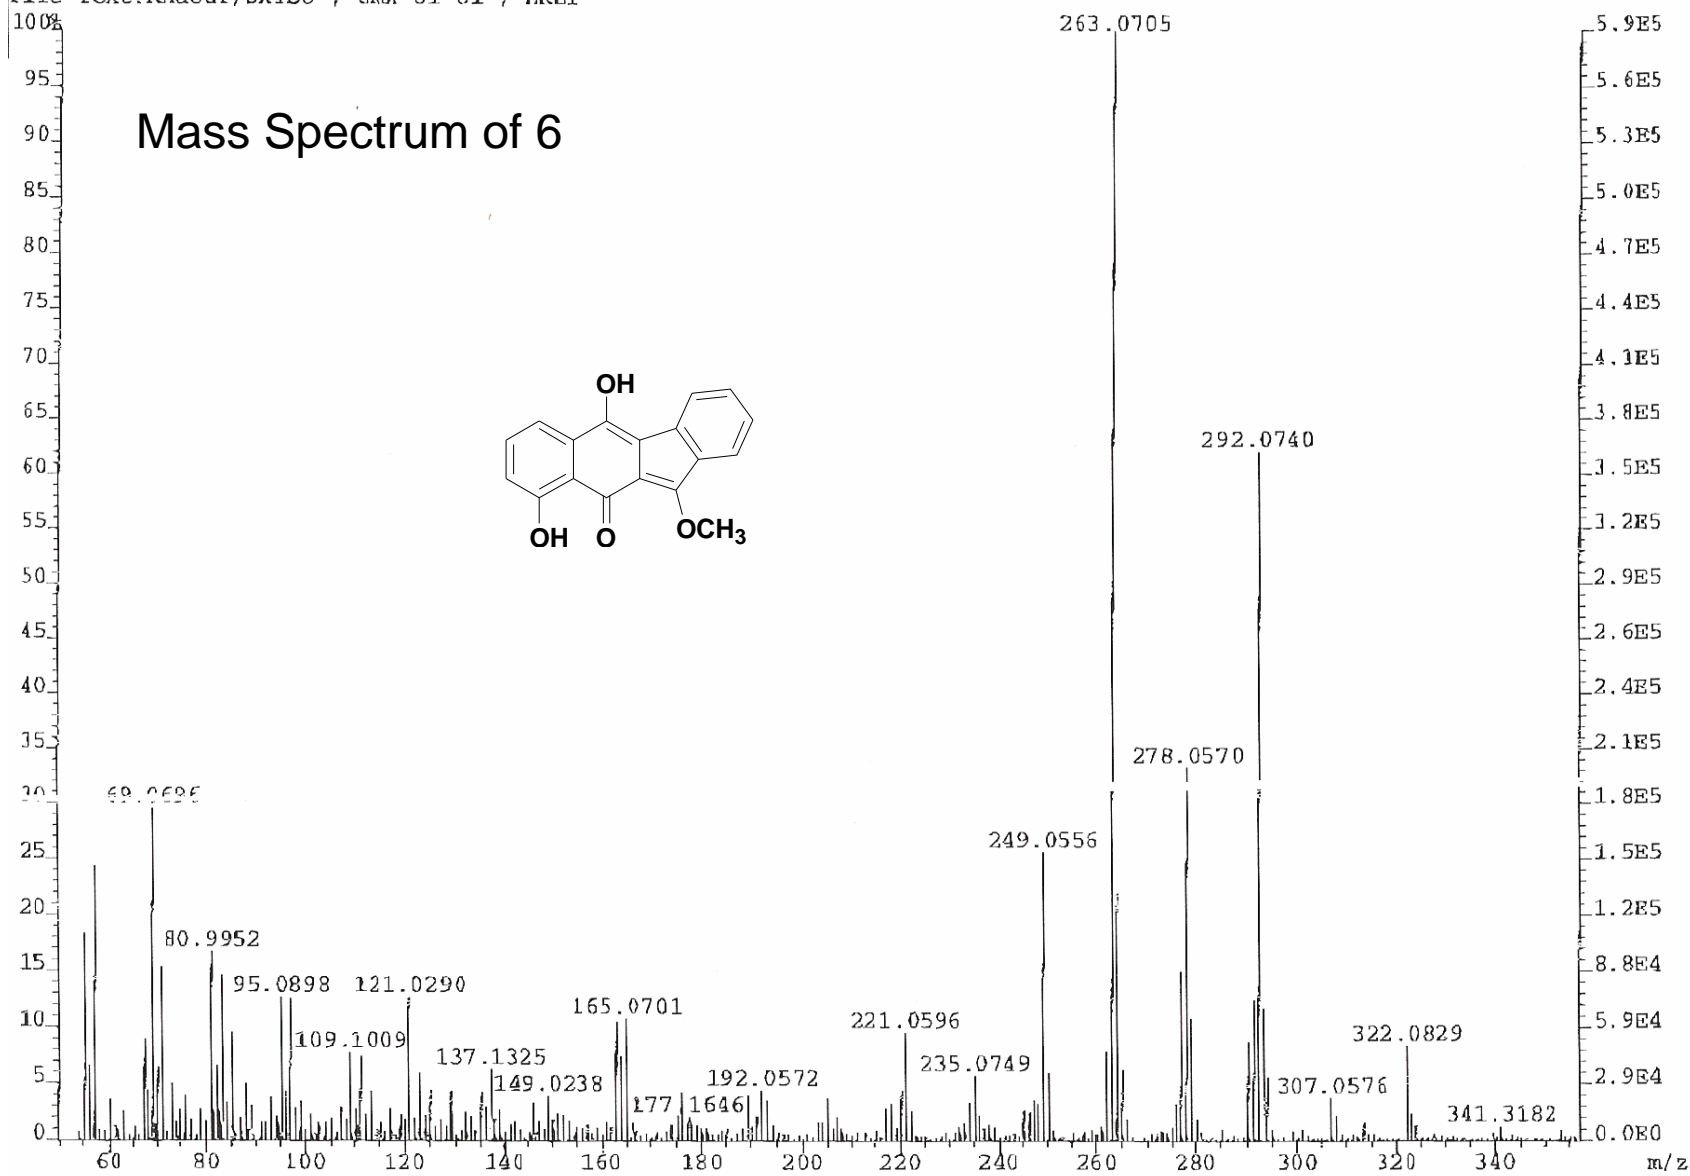

# H-NMR of 24

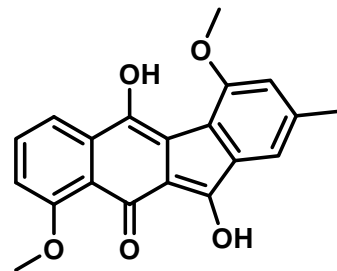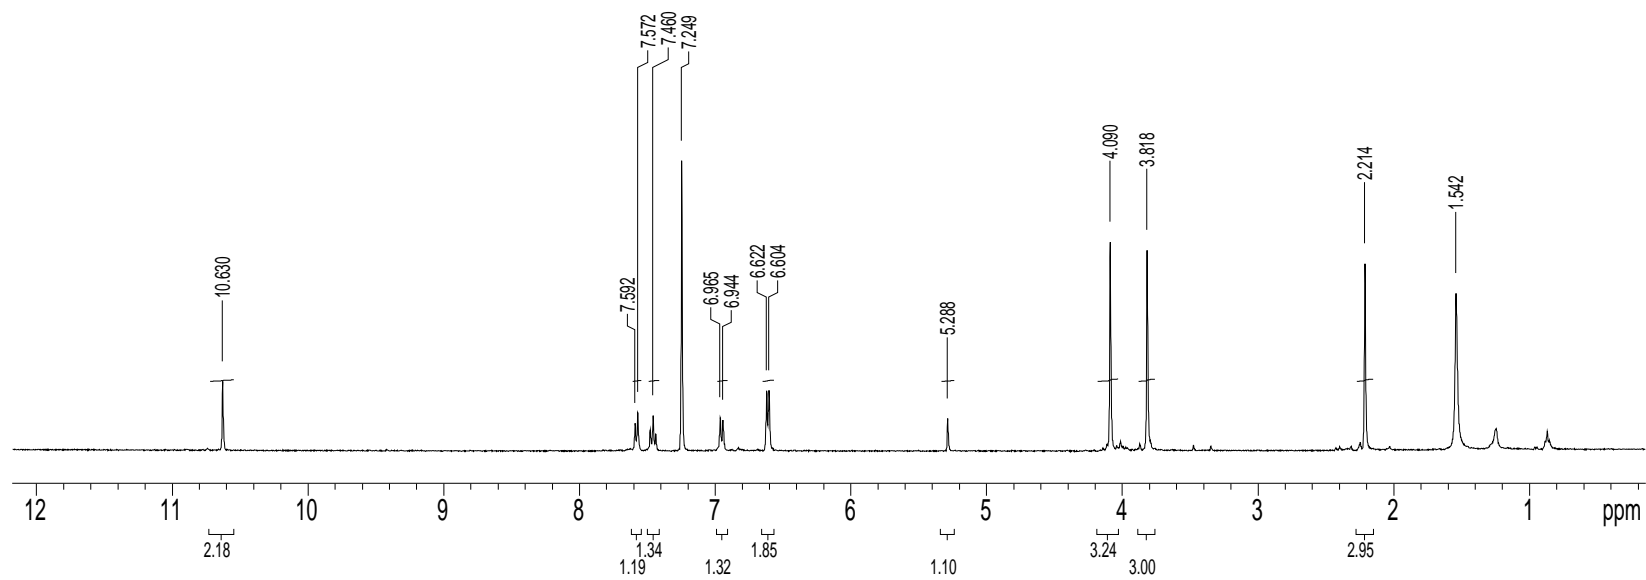

# $^{13}\text{C}$ -NMR of **24**

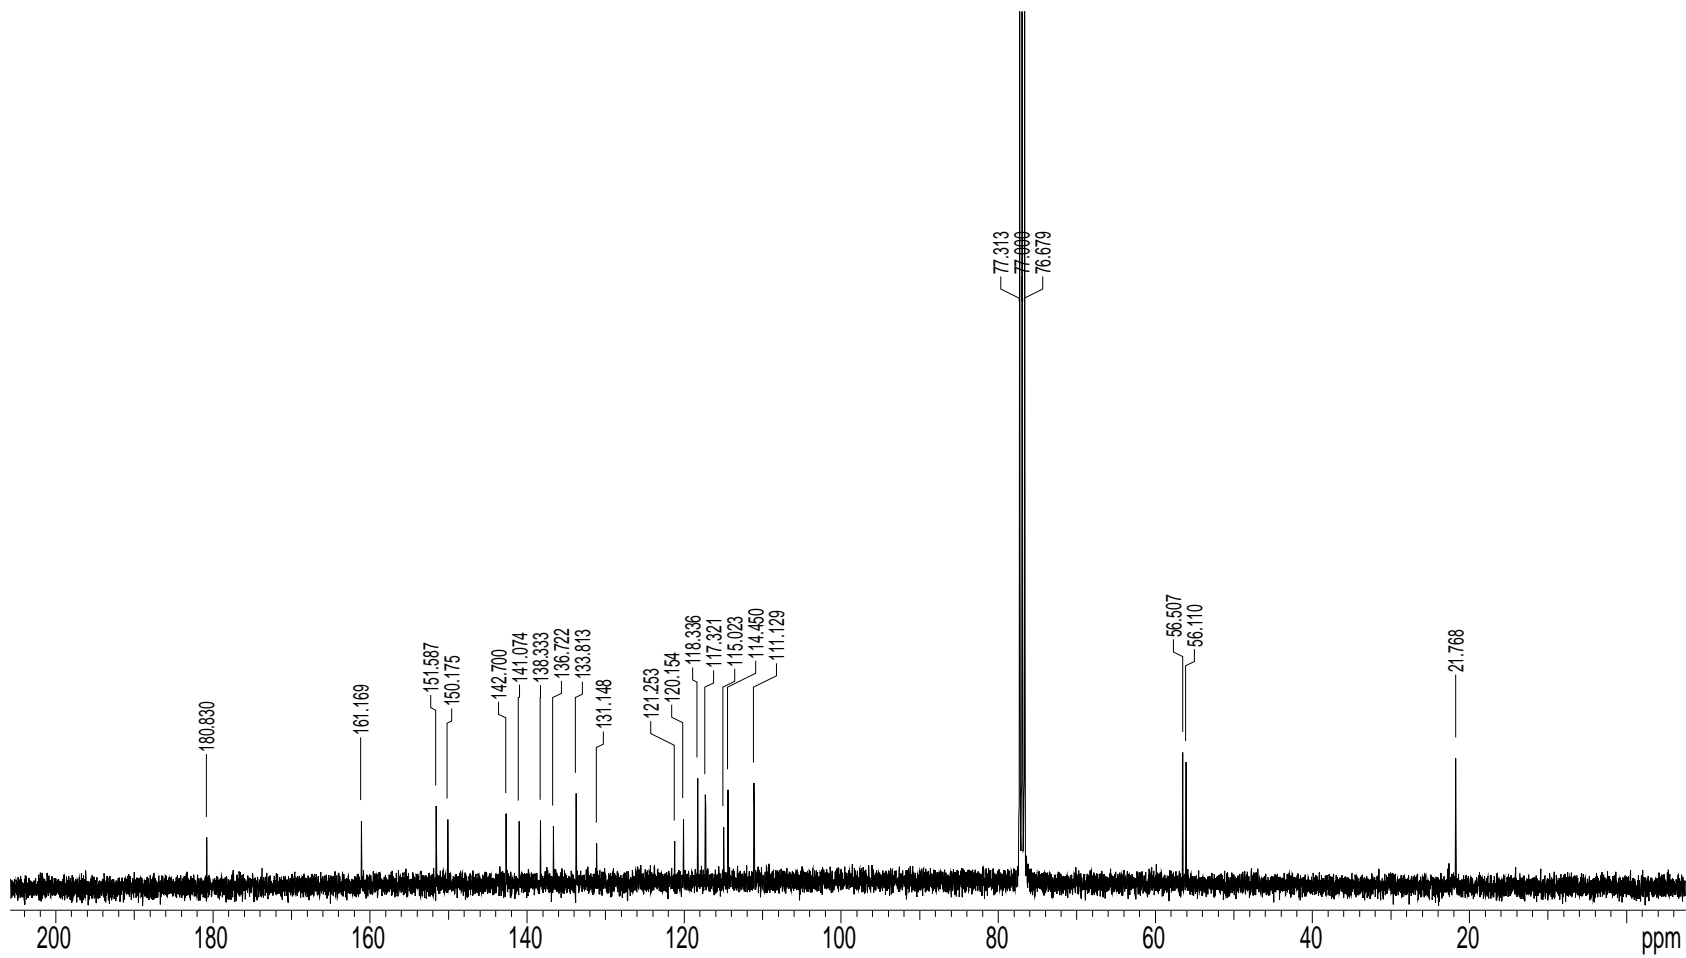

File:18821\_4B\_BG\_HRS Ident:1\_5 Win 100PPM Acq:20-OCT-2006 11:37:24 +6:02 Cal:18821\_4B\_BG\_HRS  
ZAB-SET EI+ Voltage BpM:343 BpI:6348800 TIC:33933152 Flags:ACC  
File Text:Khdour/Skibo\_OMK-81-90AC13\_in\_CH2Cl2 Created from 18821\_4\_BG\_HR 36 SMO(2,5) BSUB(4096,512,-3.0) PKD(5,3,5,0.01%,1068.0,0.00%,F>>

# Mass Spectrum of 24\*

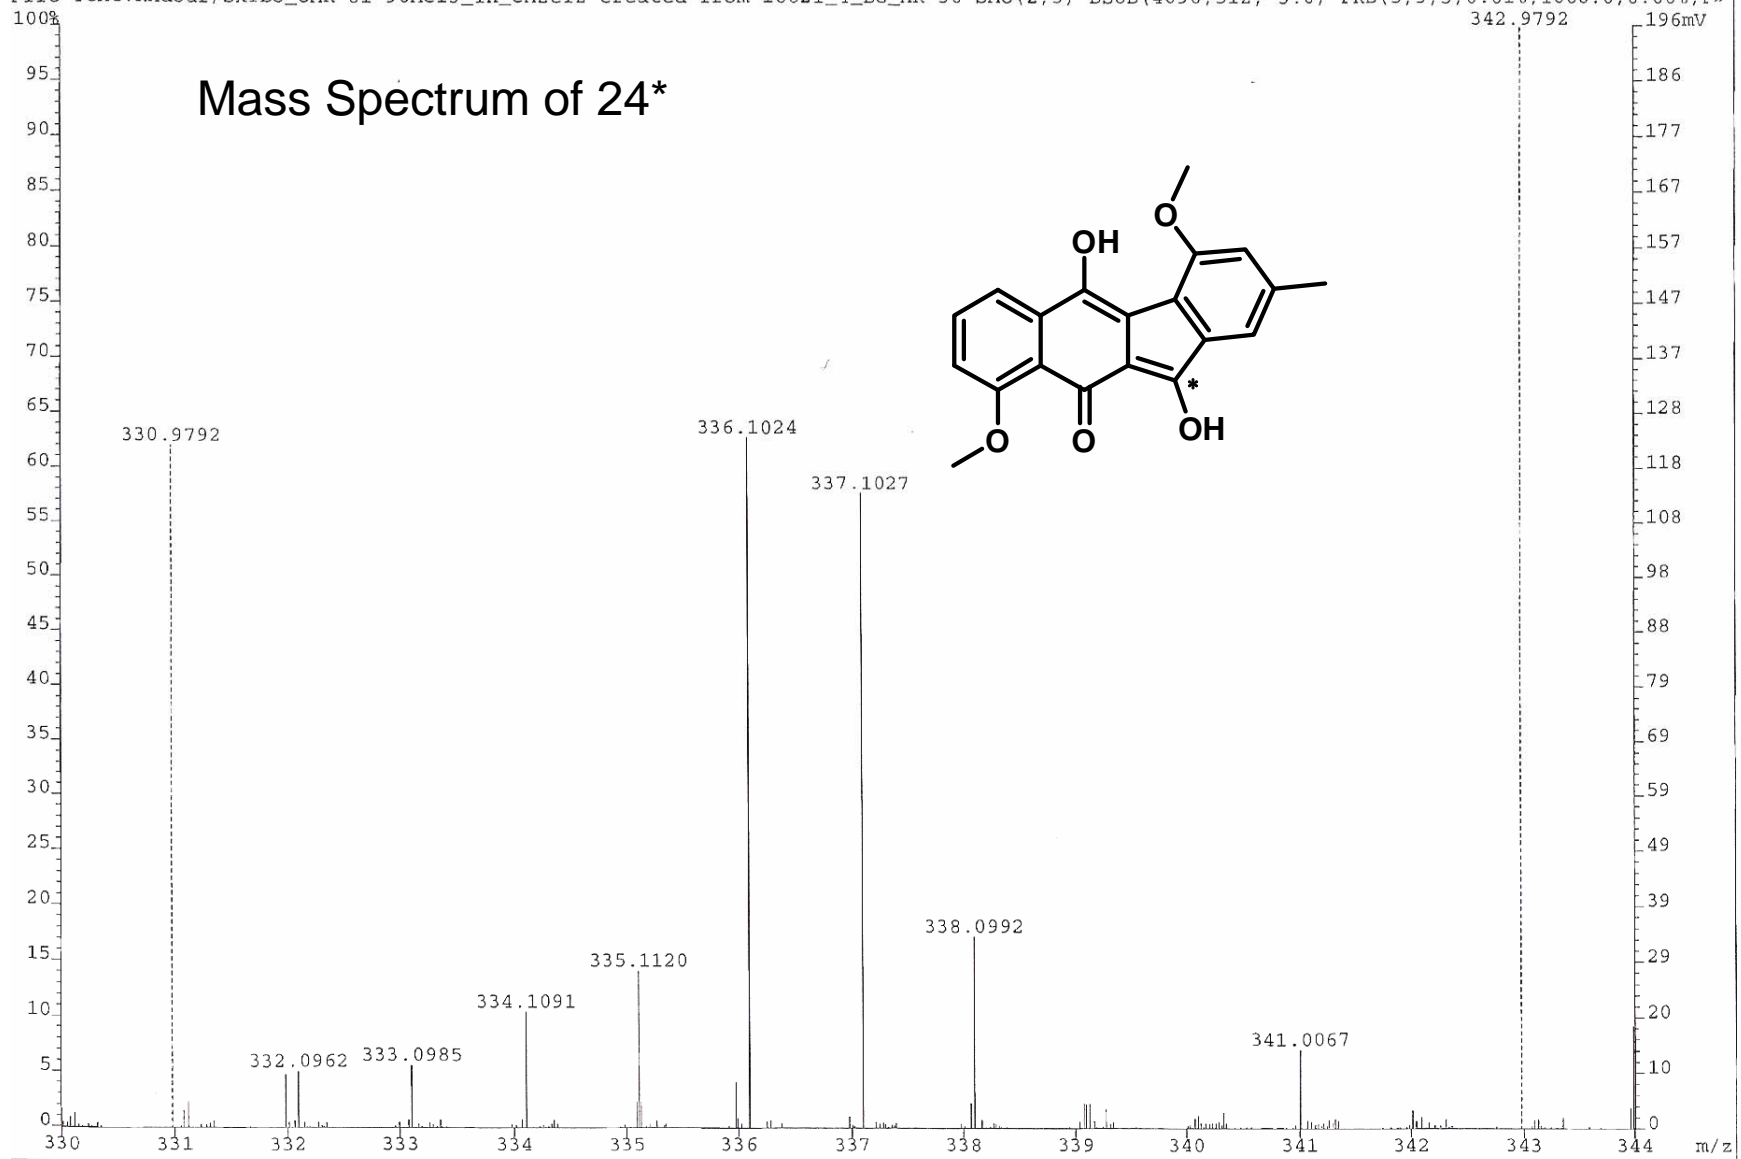

file:54130A Ident:20\_30-1\_13 Win 100PPM Acq:19-SEP-2006 14:36:37 +5:23 Cal:54130A  
AutoSpecETOFPPD EI+ Magnet BpM:57 EpI:404468 TIC:8293047 Flags:ACC  
file Text:Khdour/Skibo ; omk-81-83a ; HRRI

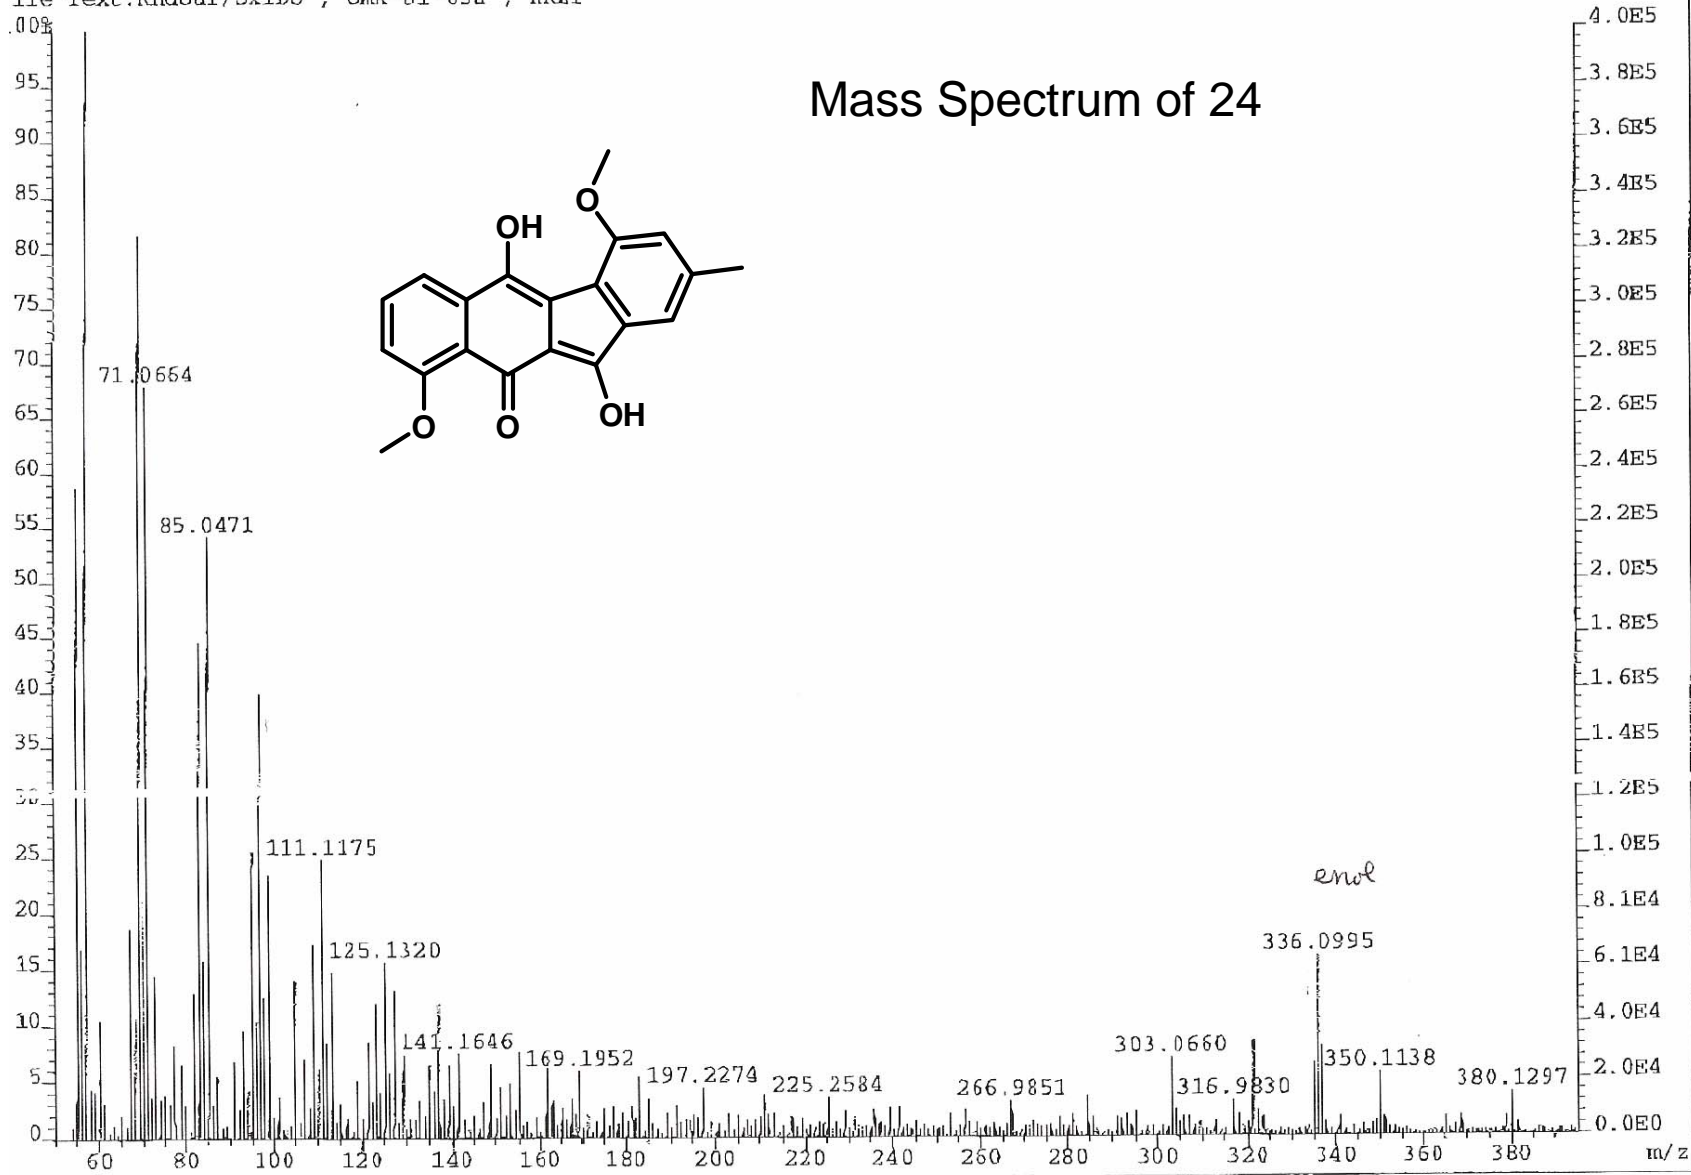

File:18819\_1B\_BG\_HRS Ident:1\_6 Win 100PPM Acq:19-OCT-2006 12:18:21 +4:47 Cal:18819\_1B\_BG\_HRS  
ZAB-SET EI+ Voltage BpM:336 BpI:16485035 TIC:30486864 Flags:ACC  
File Text:Khdour/Skibo\_OMK-81-90C\_in\_CH2Cl2 Created from 18819\_1\_BG\_HR 24 SMO(2,9) BSUB(4096,512,-3.0) PKD(5,3,5,0.01%,4.0,0.00%,F,F) SP:

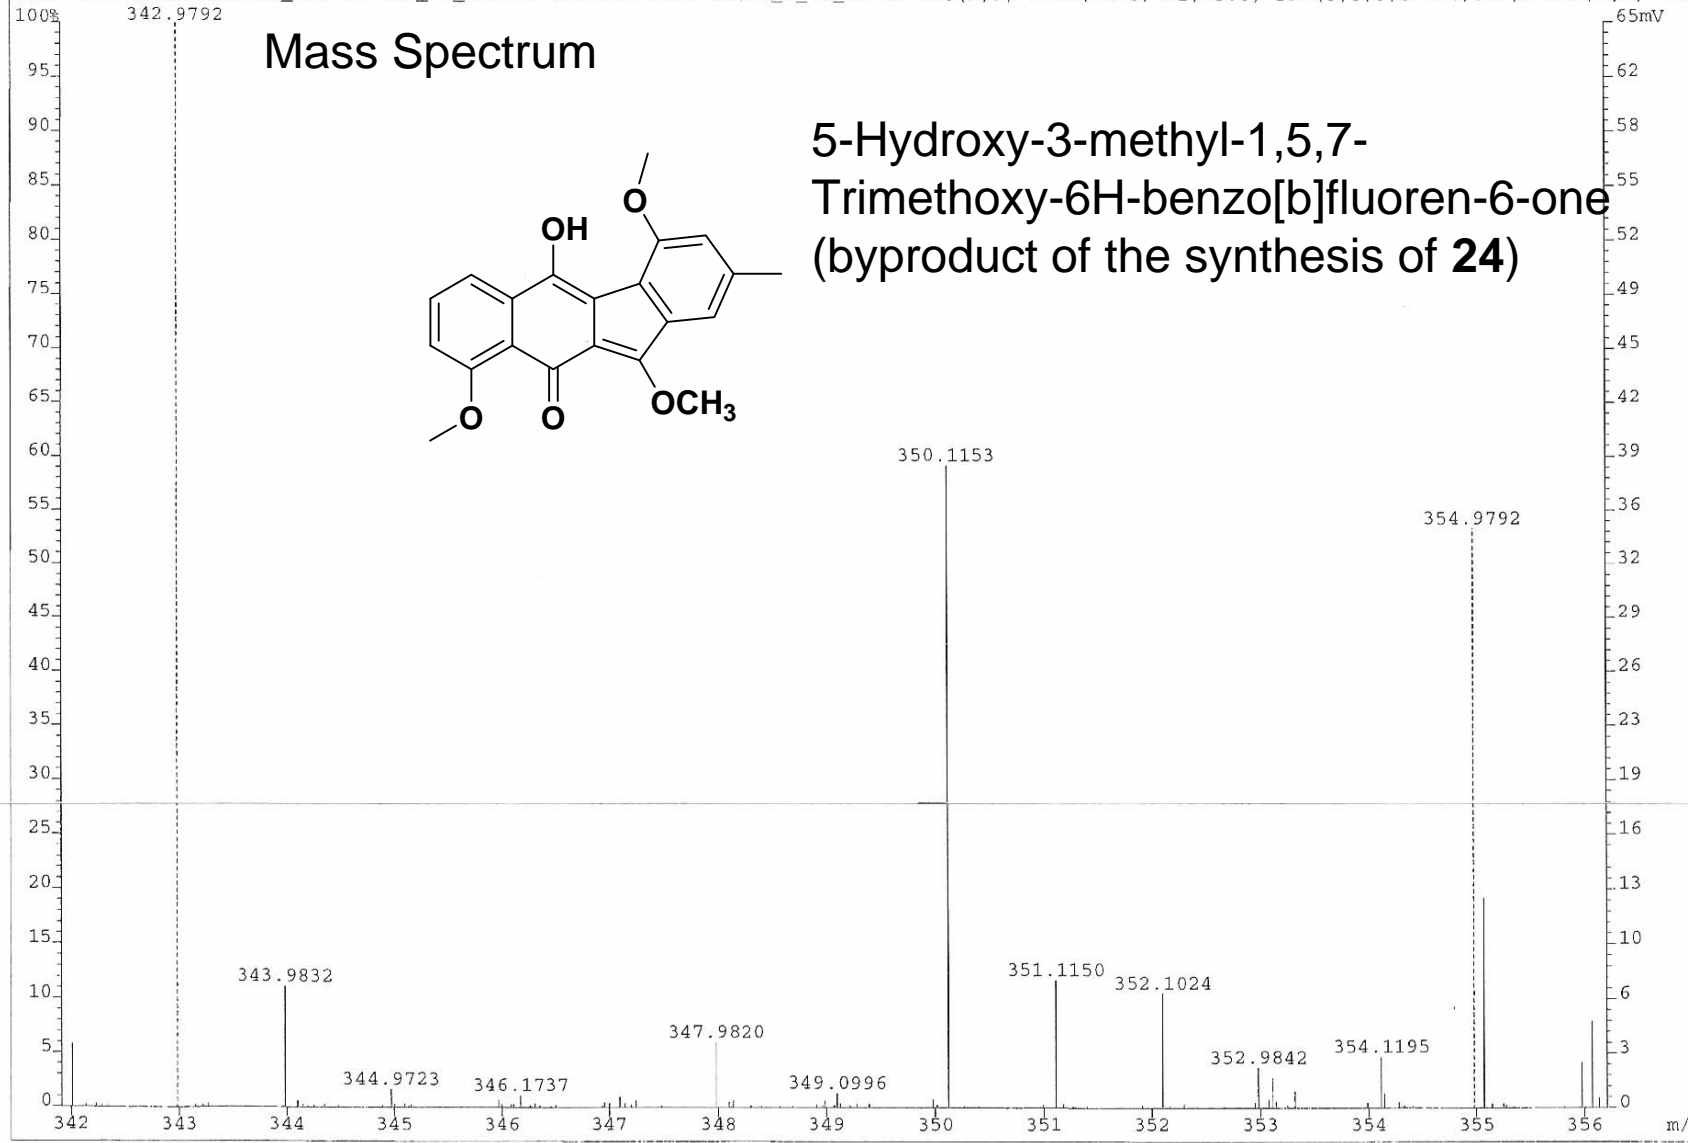

# H-NMR Spectrum

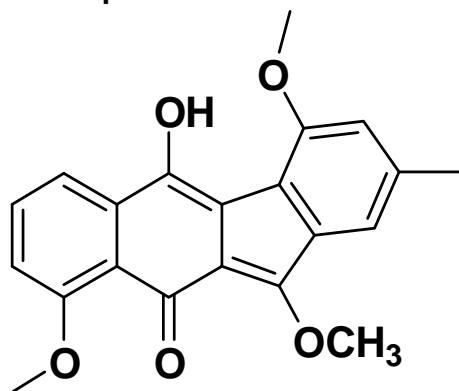

5-Hydroxy-3-methyl-1,5,7-Trimethoxy-6H-benzo[b]fluoren-6-one  
(byproduct of the synthesis of **24**)

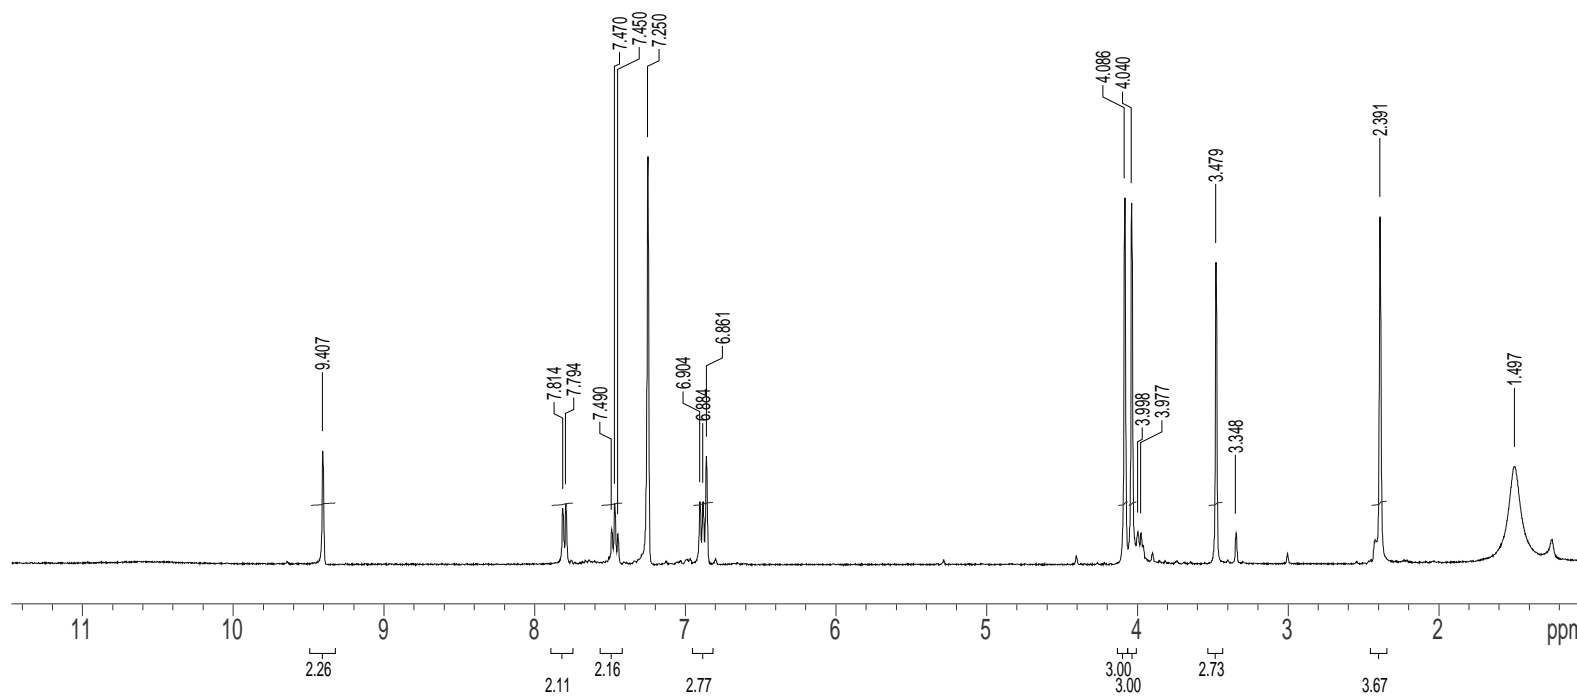



# H-NMR of 25

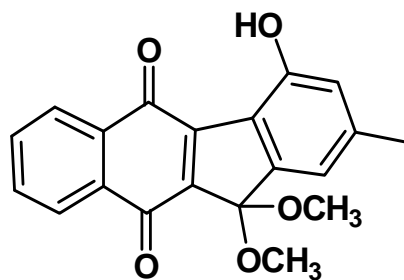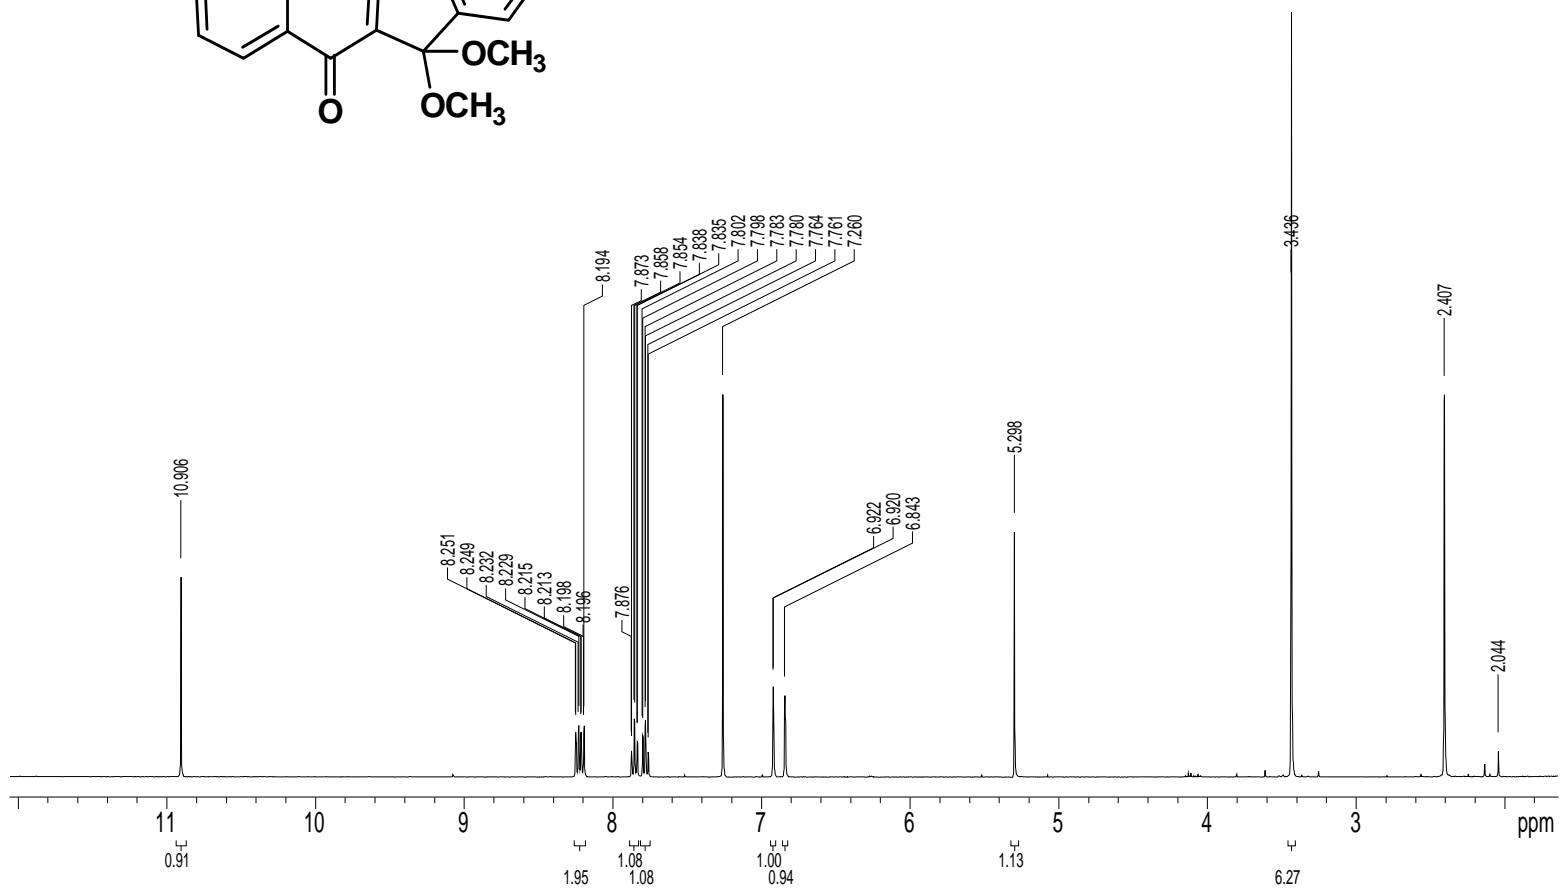

# H-NMR of 25

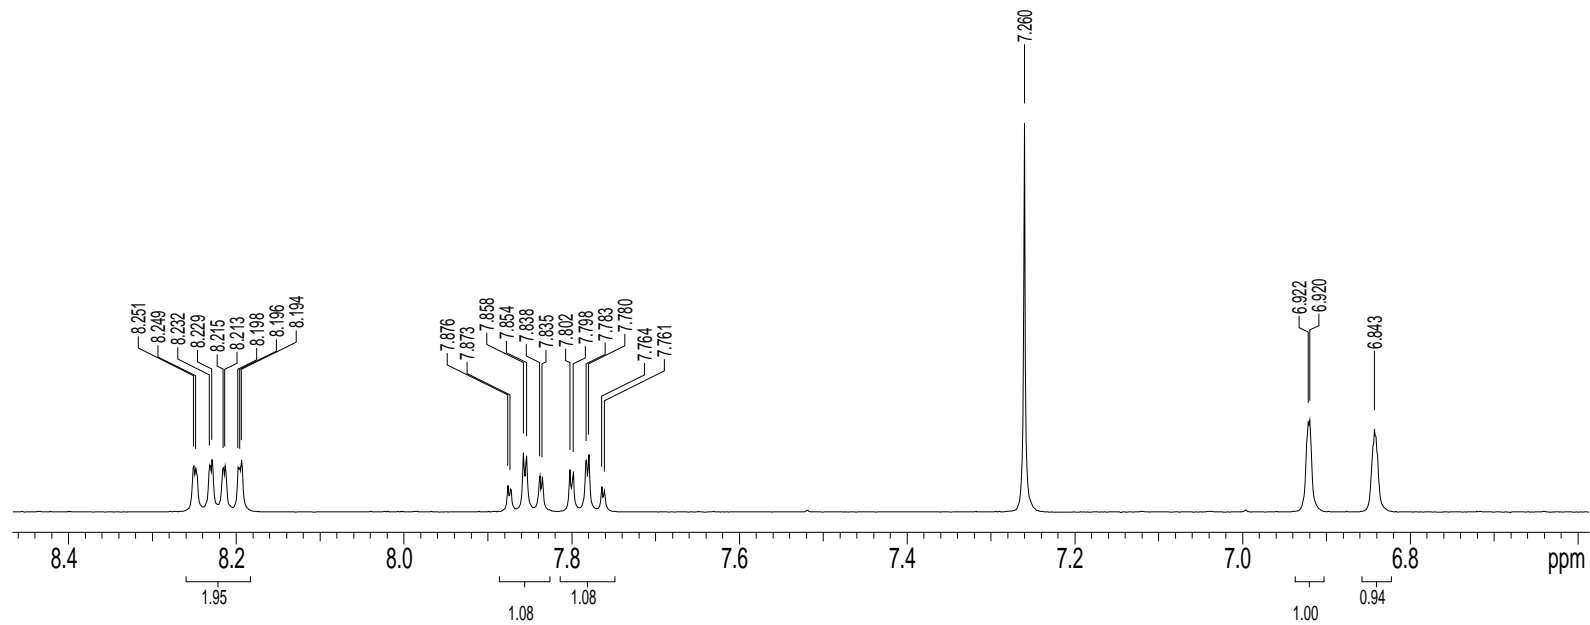

File: 54248 Ident: 41\_51-1\_9 Win 100PPM Acq: 16-OCT-2006 13:33:58 49:44 Cal: 54248  
AutoSpecETOFPPD EI+ Magnet BpM: 305 BpI: 3280788 TIC: 67064164 Flags: ACC  
File Text: Khmour/Skibo ; amk-anlog4 ; HREI

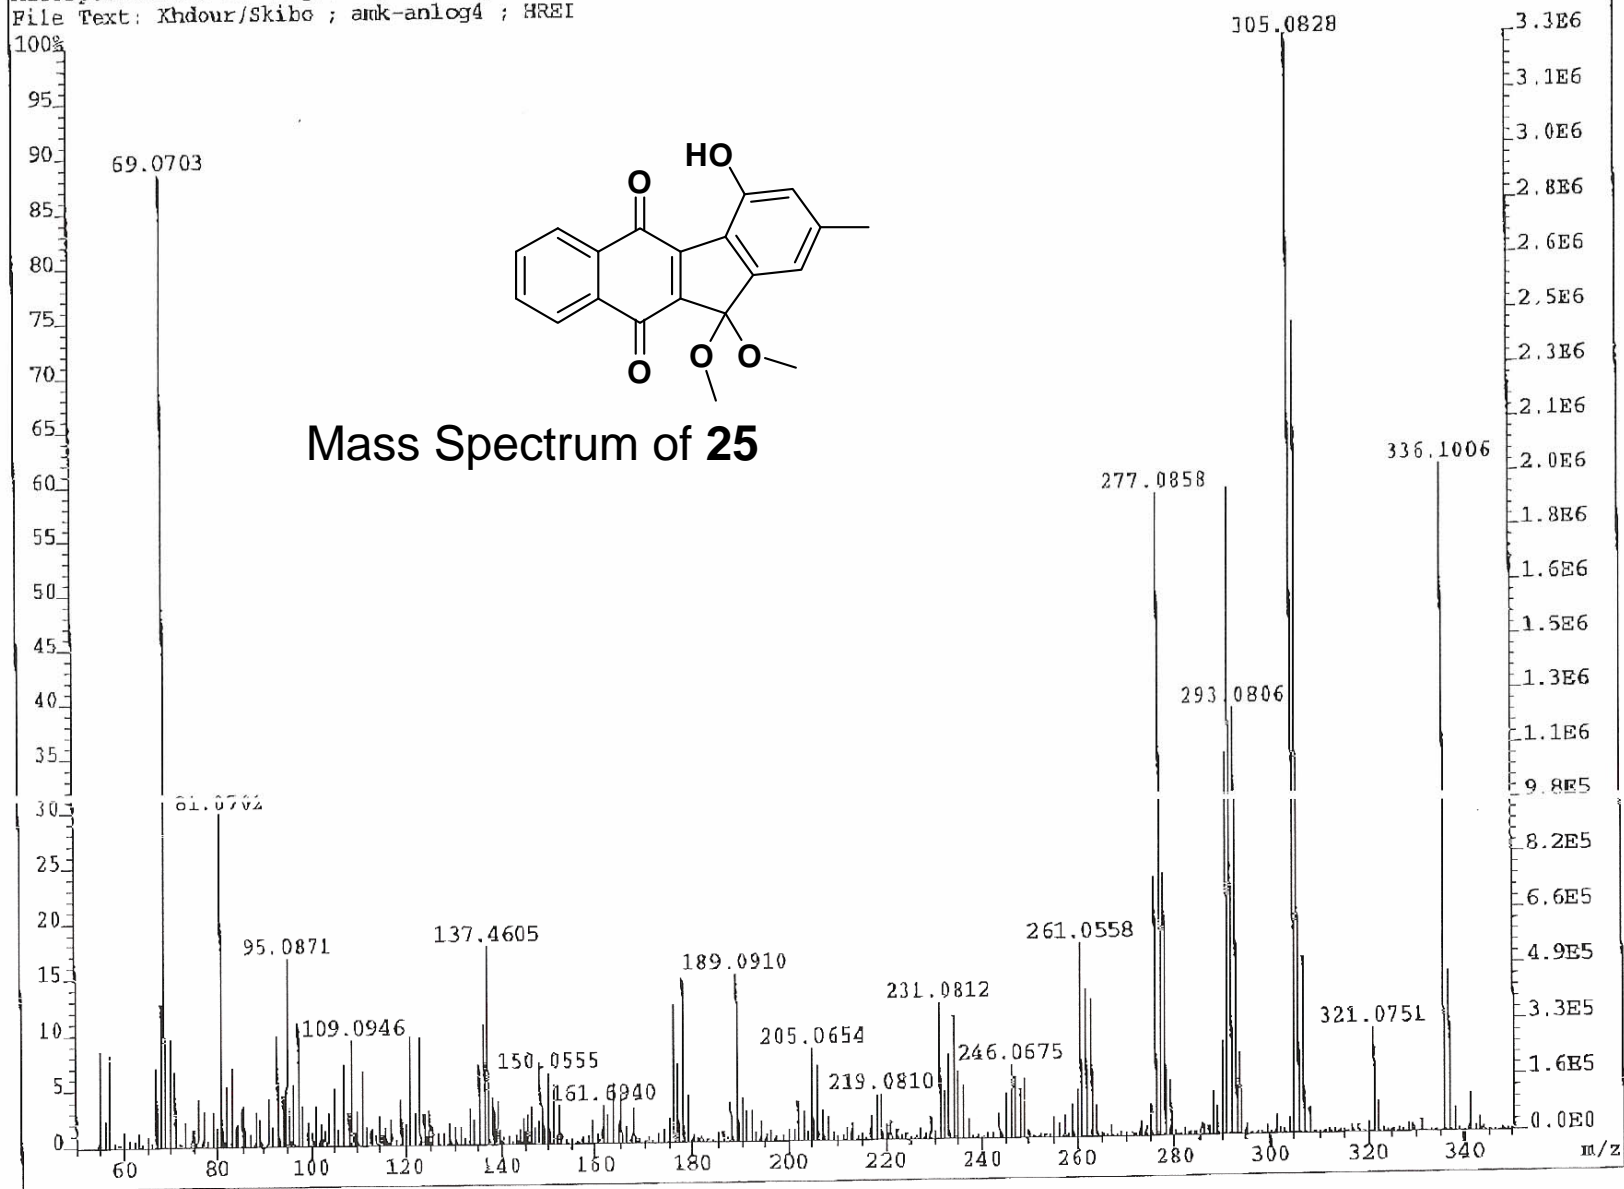

# H-NMR of 28\*

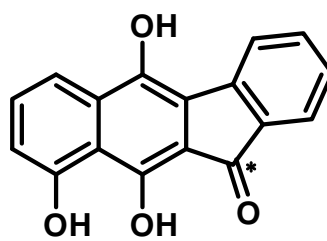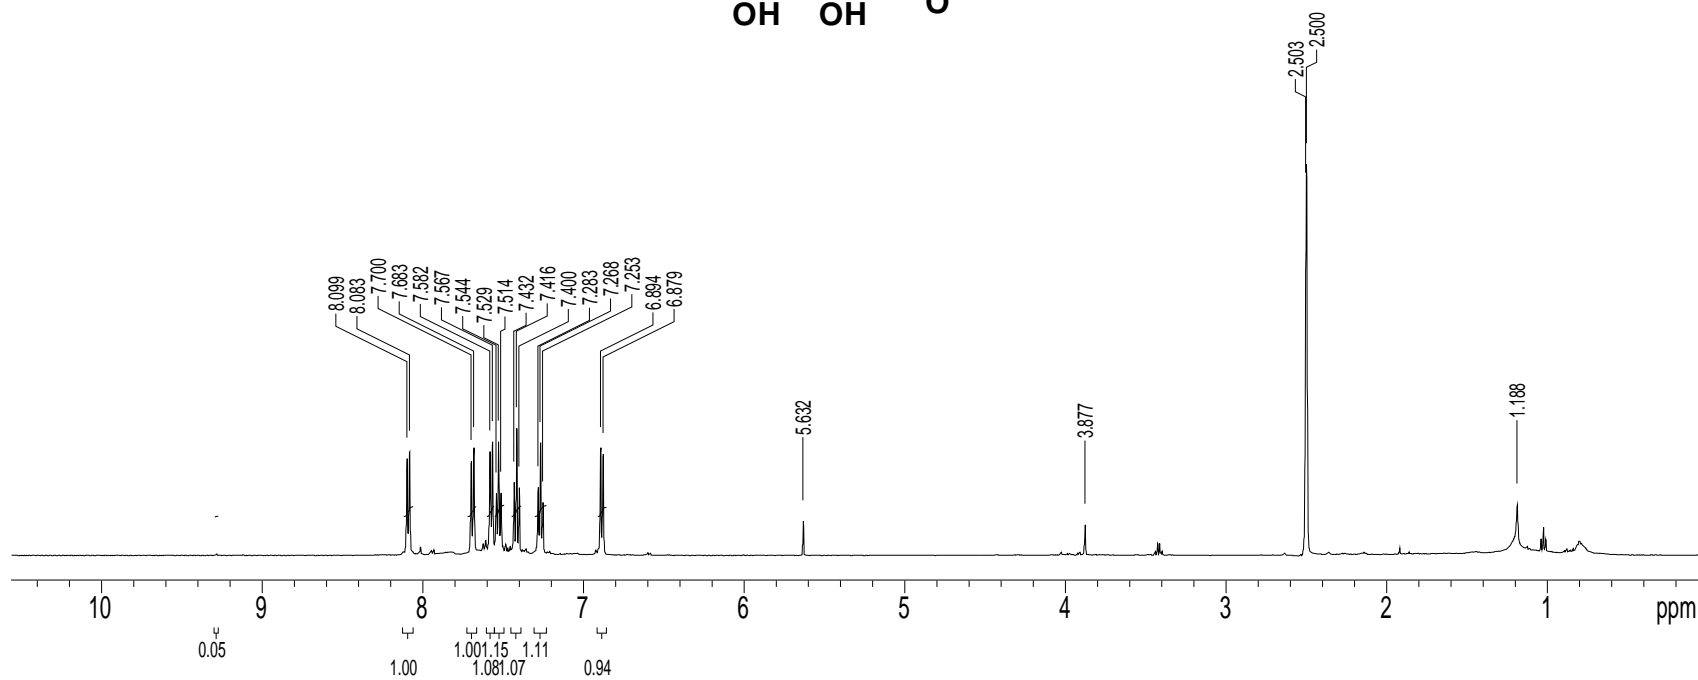

# H-NMR of 28\*

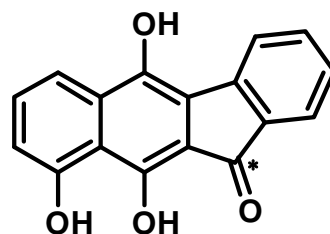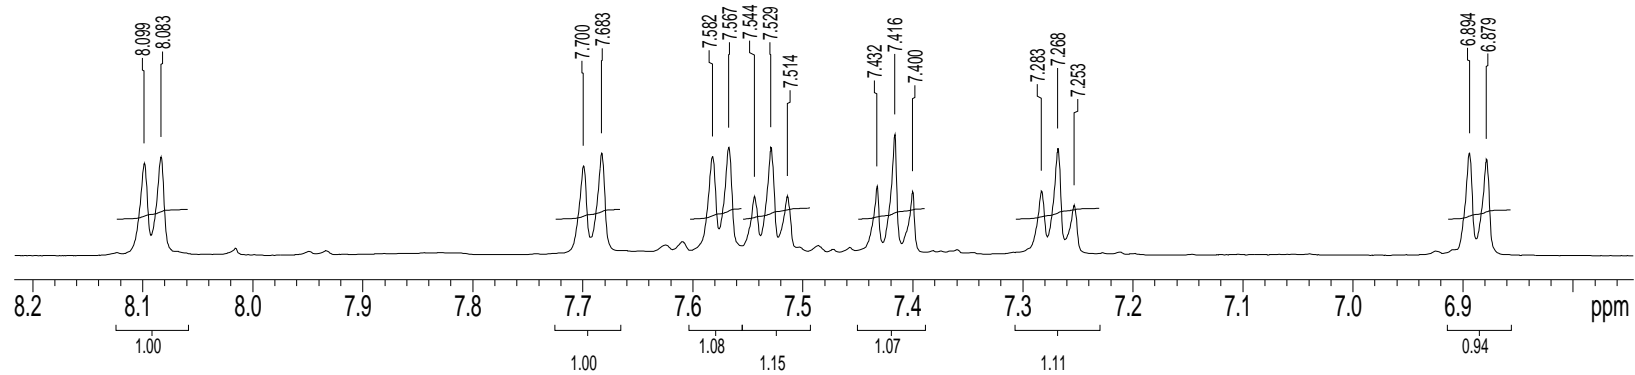

<sup>13</sup>C-NMR of 28

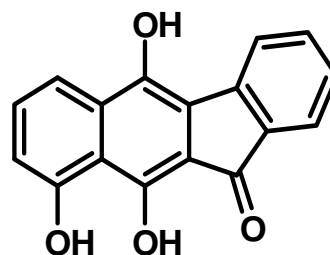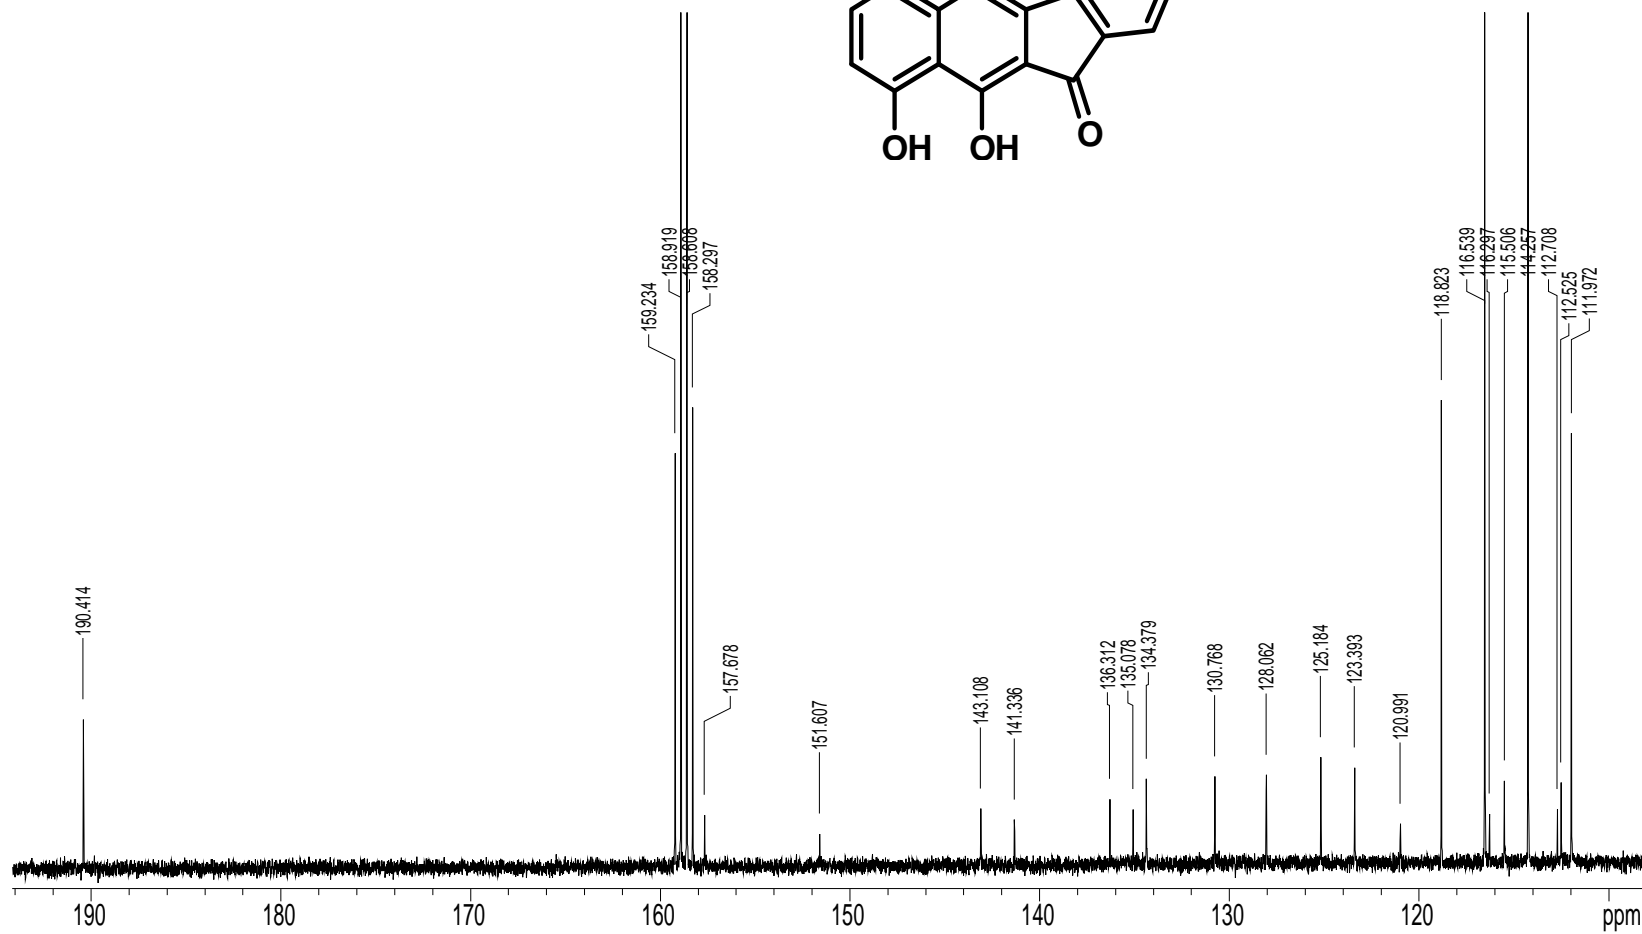

File:54516A Ident:64\_74-1\_9 Win 10CPM Acq:30-JAN-2007 14:36:11 +14:30 Cal:54516A  
AutoSpecRTOFFPD EI+ Magnet BpM:279 BpI:414325 TIC:4483296 Flags:ACC  
File Text:Khdour/Skibo ; OMK-EC13 ; HREI

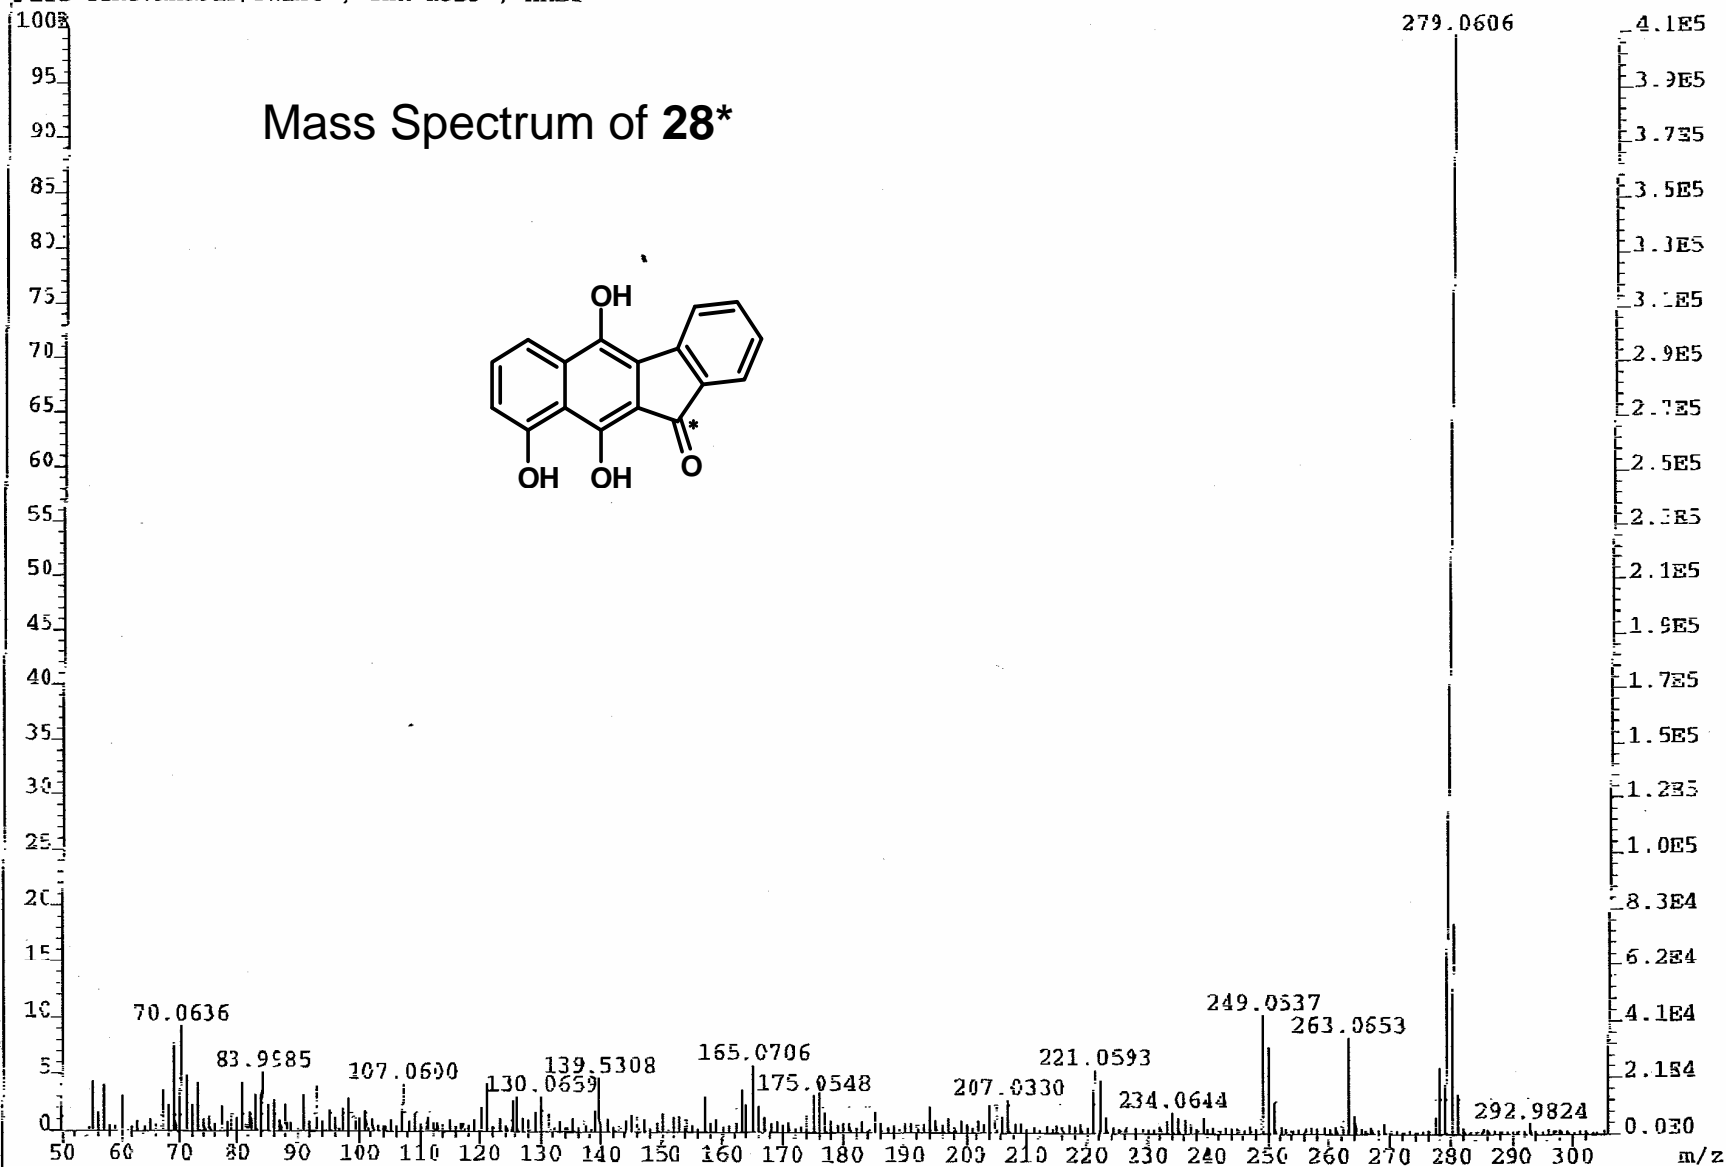

AutoSpecETOFFPD EI+ Magnet SpM:69 RpI:760092 TIC:8521565 Flags:ACC  
File Text:Khdour/Skibo ; OMK-R ; HRBI

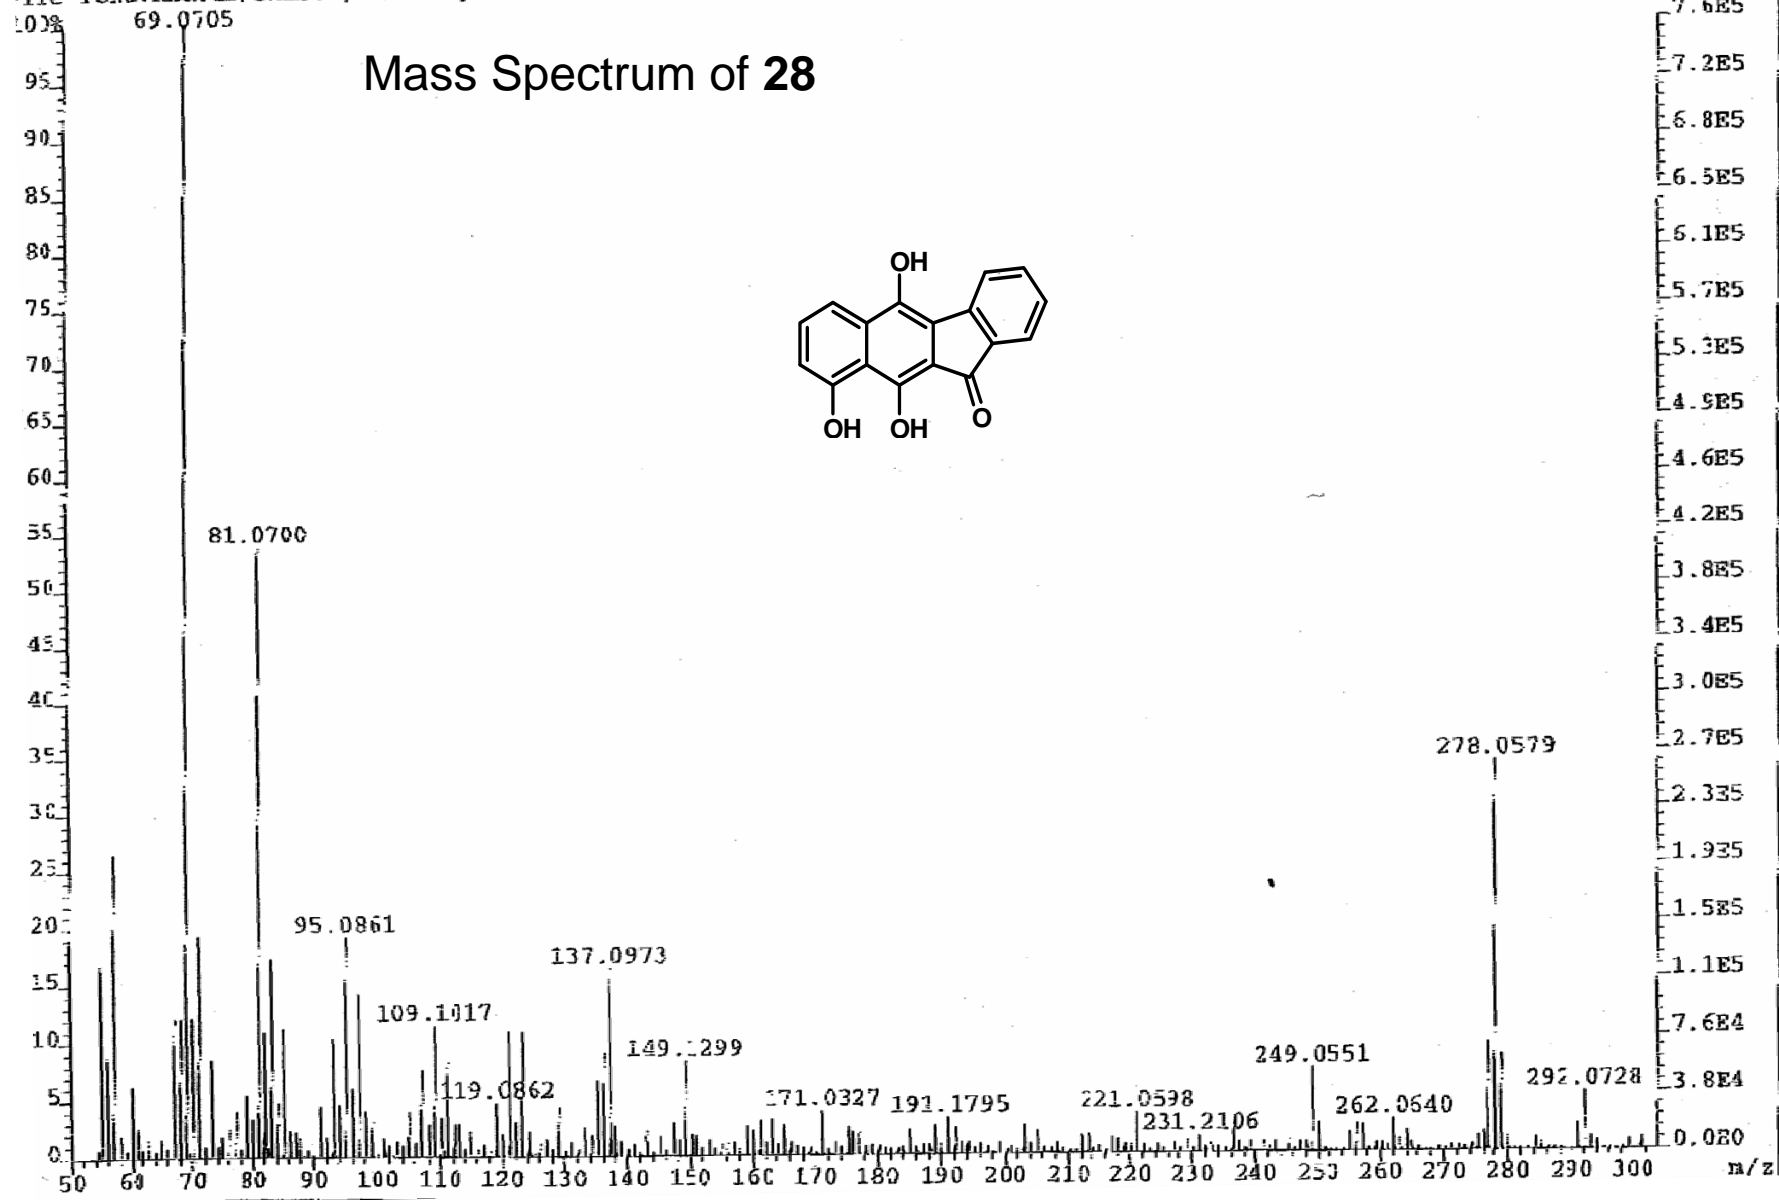



File: 54524C Ident: 37\_40-19 Win 100PPM Acq: 1-FEB-2007 16:28:49 +8:11 Cal: 54524C  
AutoSpecE TOF/MS EI+ Magnet BpM: 57 BpI: 285662 TIC: 6533805 Flags: ACC  
File Text: Khmour/Skibo ; OMK-i ; HREI

### Mass Spectrum of the Quinone Methide (Scheme 11)

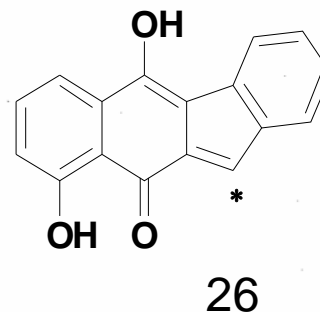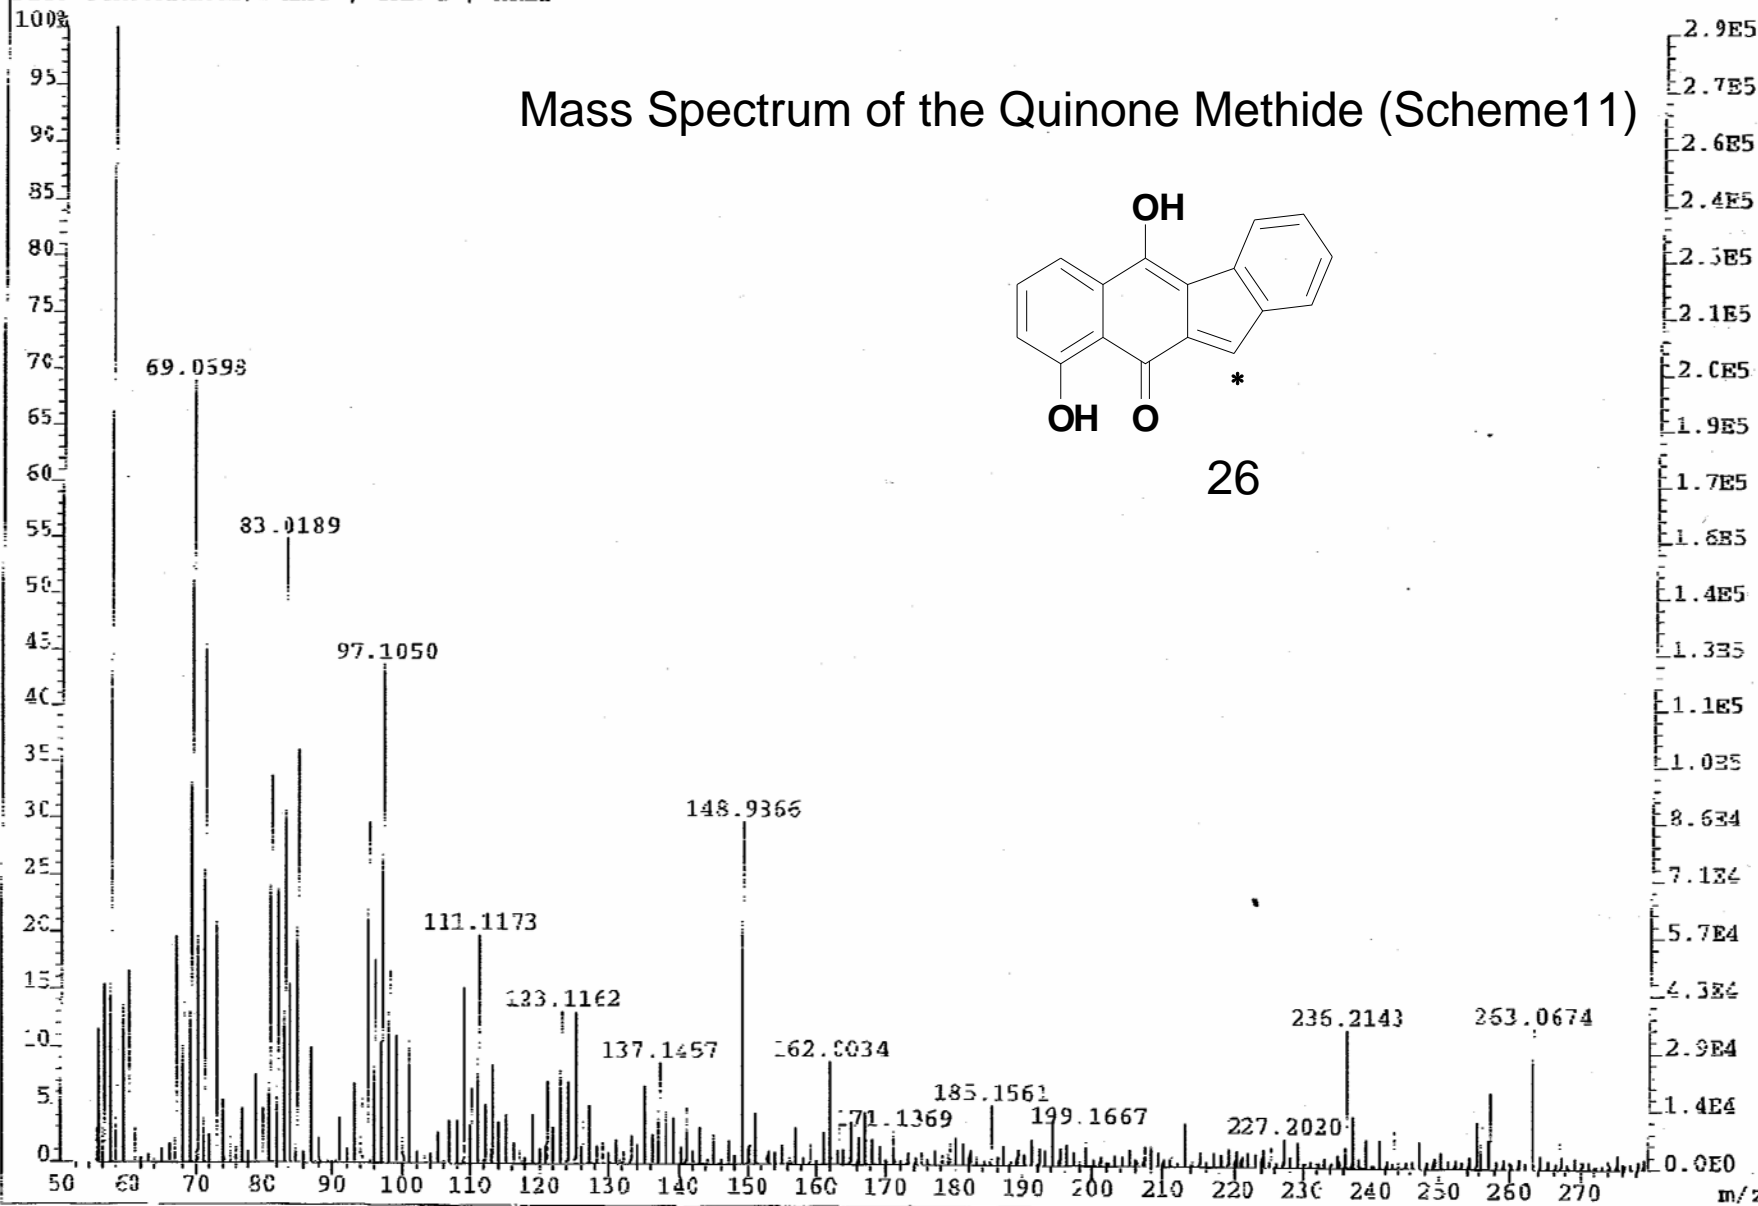

File:54525A Ident:73\_75-1\_11 Win 100PPM Acq: 1-FEB-2007 12:13:49 +15:32 Cal:54525A  
AutoSpecETOFFPD EI+ Magnet BpM:263 BpI:4360991 TIC:72542344 Flags:ACC  
File Text:Khdour/Skibo ; OMK-ii ; HREI

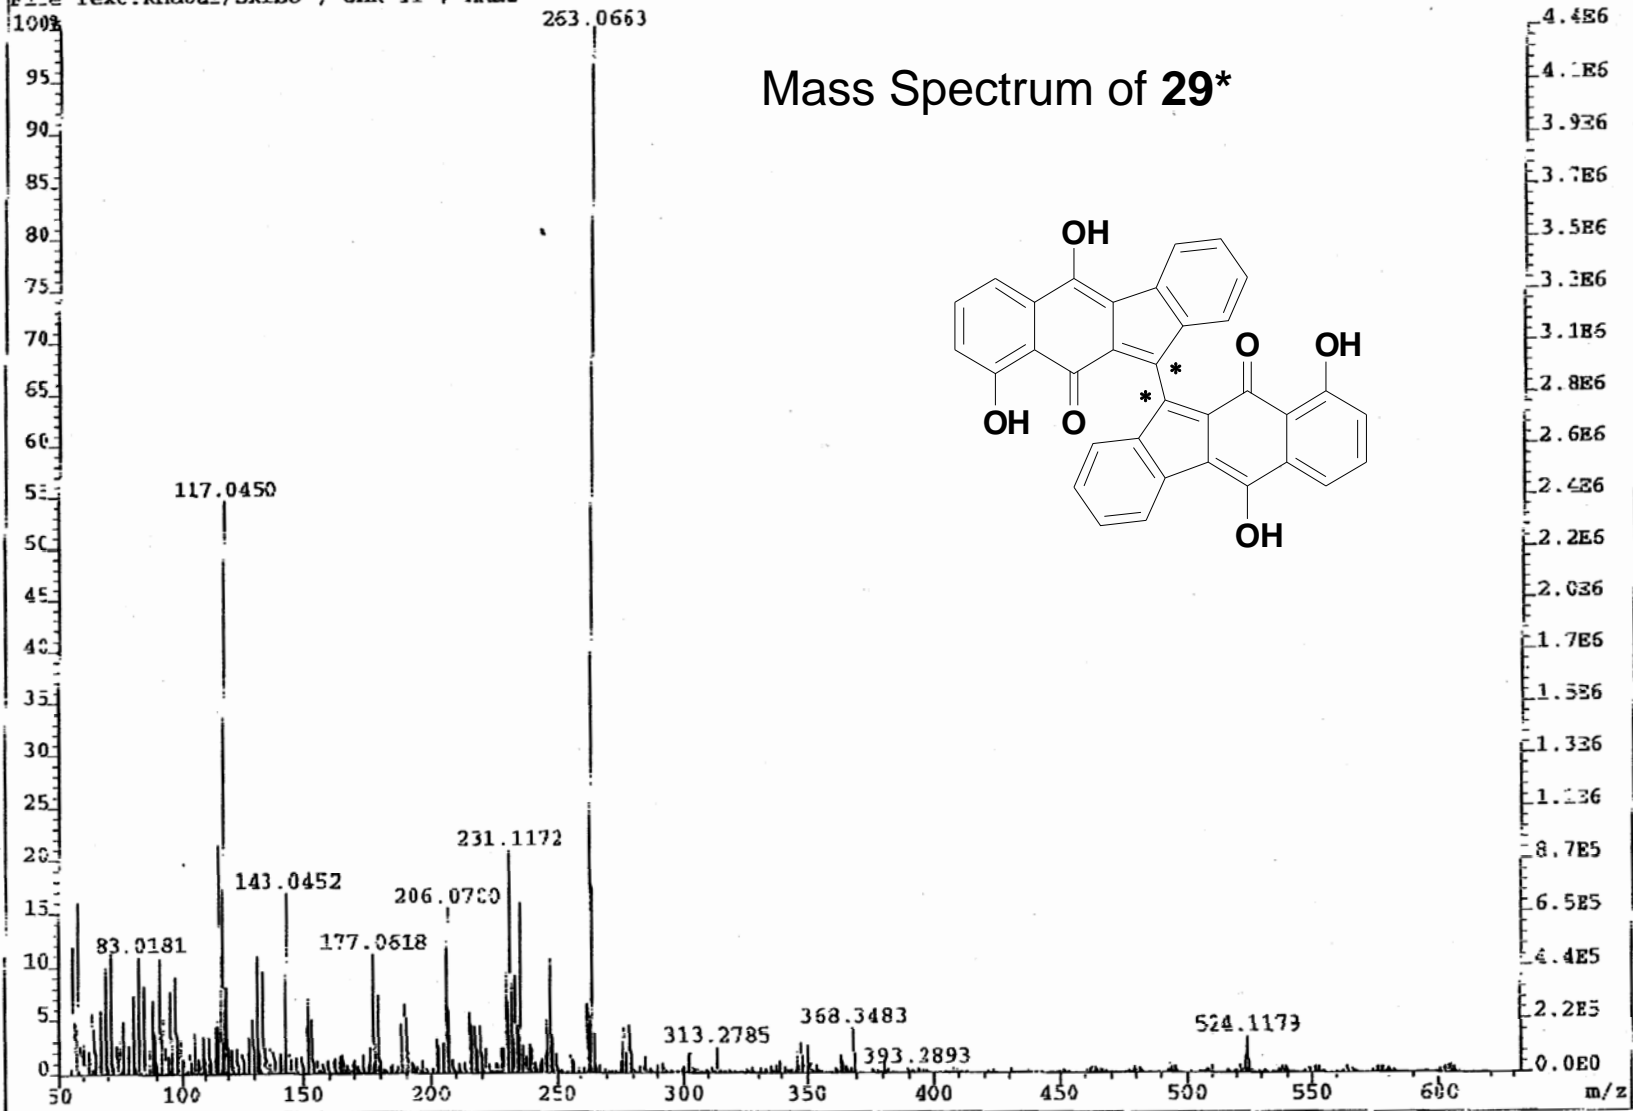

File:54249B Ident:39\_49 SMO(1,7) Acq:25-OCT-2006 14:04:50 +9:51 Cal:SERCAL02506  
AutoSpecTTOFFPD FAB+ Magnet BpI:3477248 TIC:488030496  
File Text:Rhdour/Skibo ; onk-dimer; LRFAB pos ion, matrix: 3-NBA

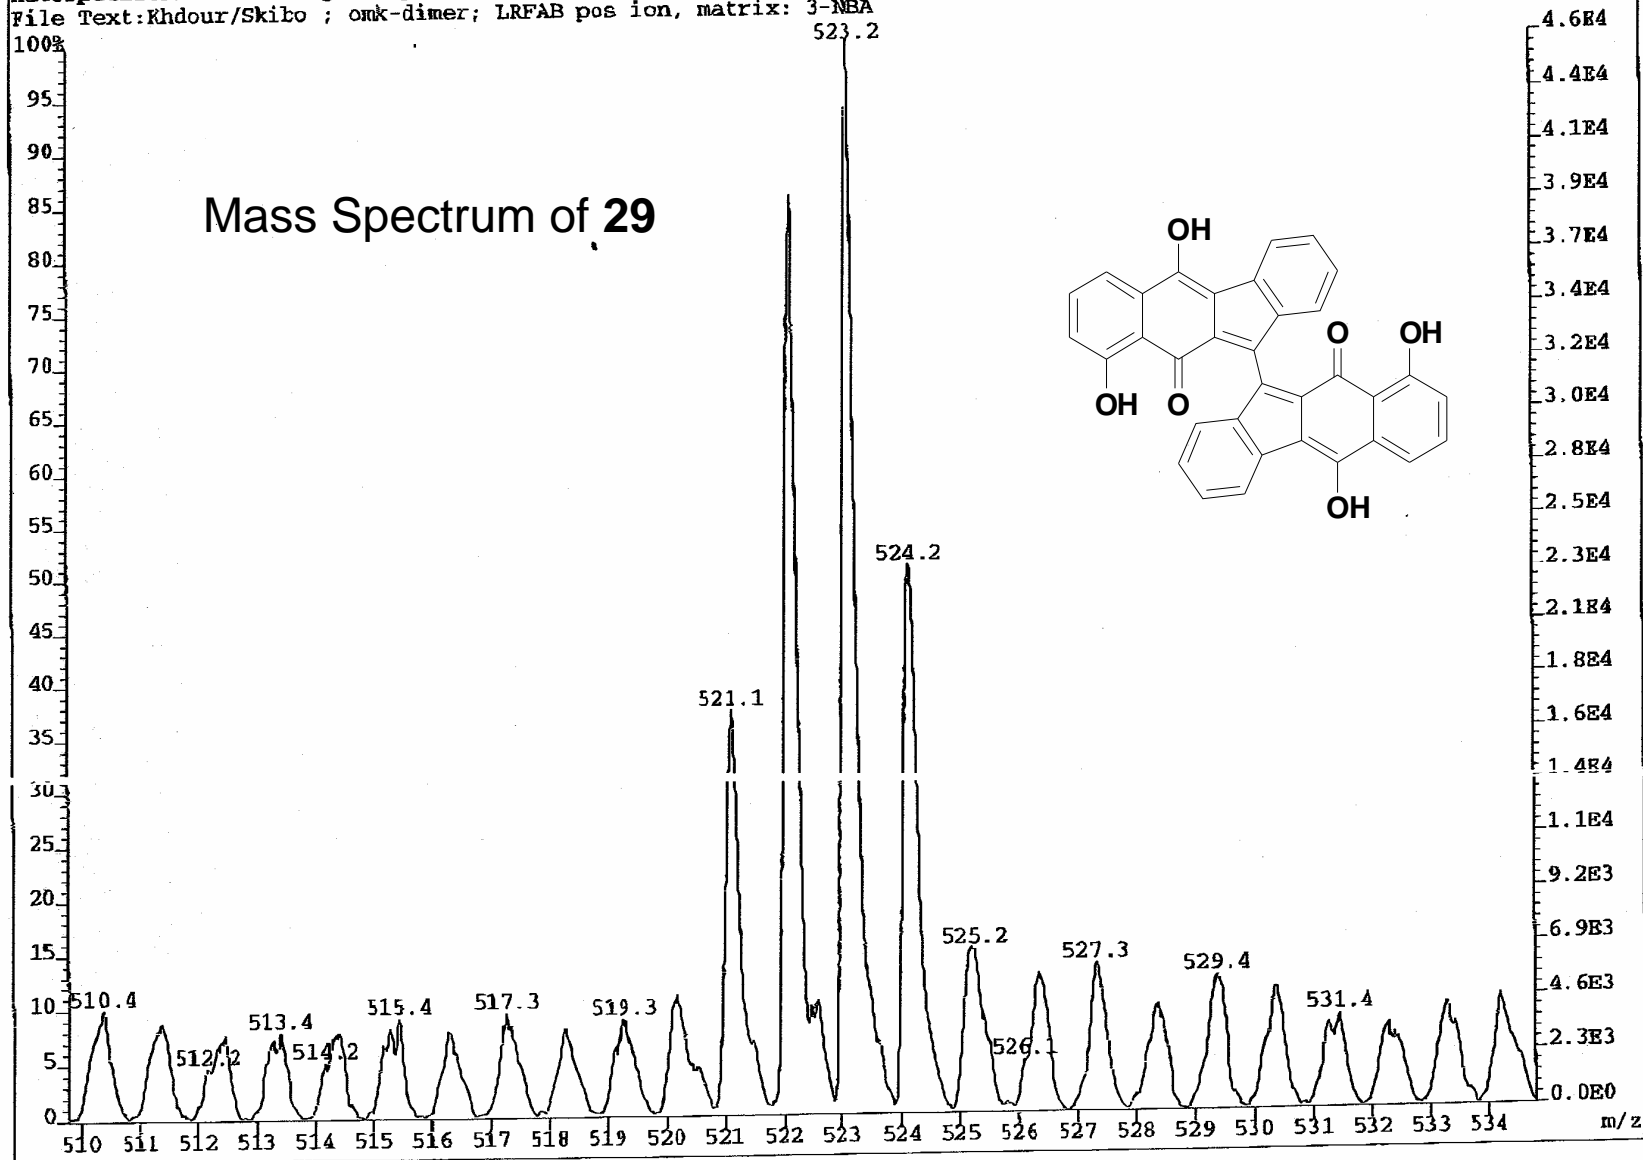

File:541318 Ident:30\_32-1\_0 Win 100PPM Acq:19-SRP-2006 17:05:37 +6:38 Cal:54131B  
AutoSpecETOFFPD EI+ Magnet BpM:149 BpI:3272672 TIC:26906838 Flags:ACC  
File Text:Khdour/Skibo ; omk-81-79a ; HREI

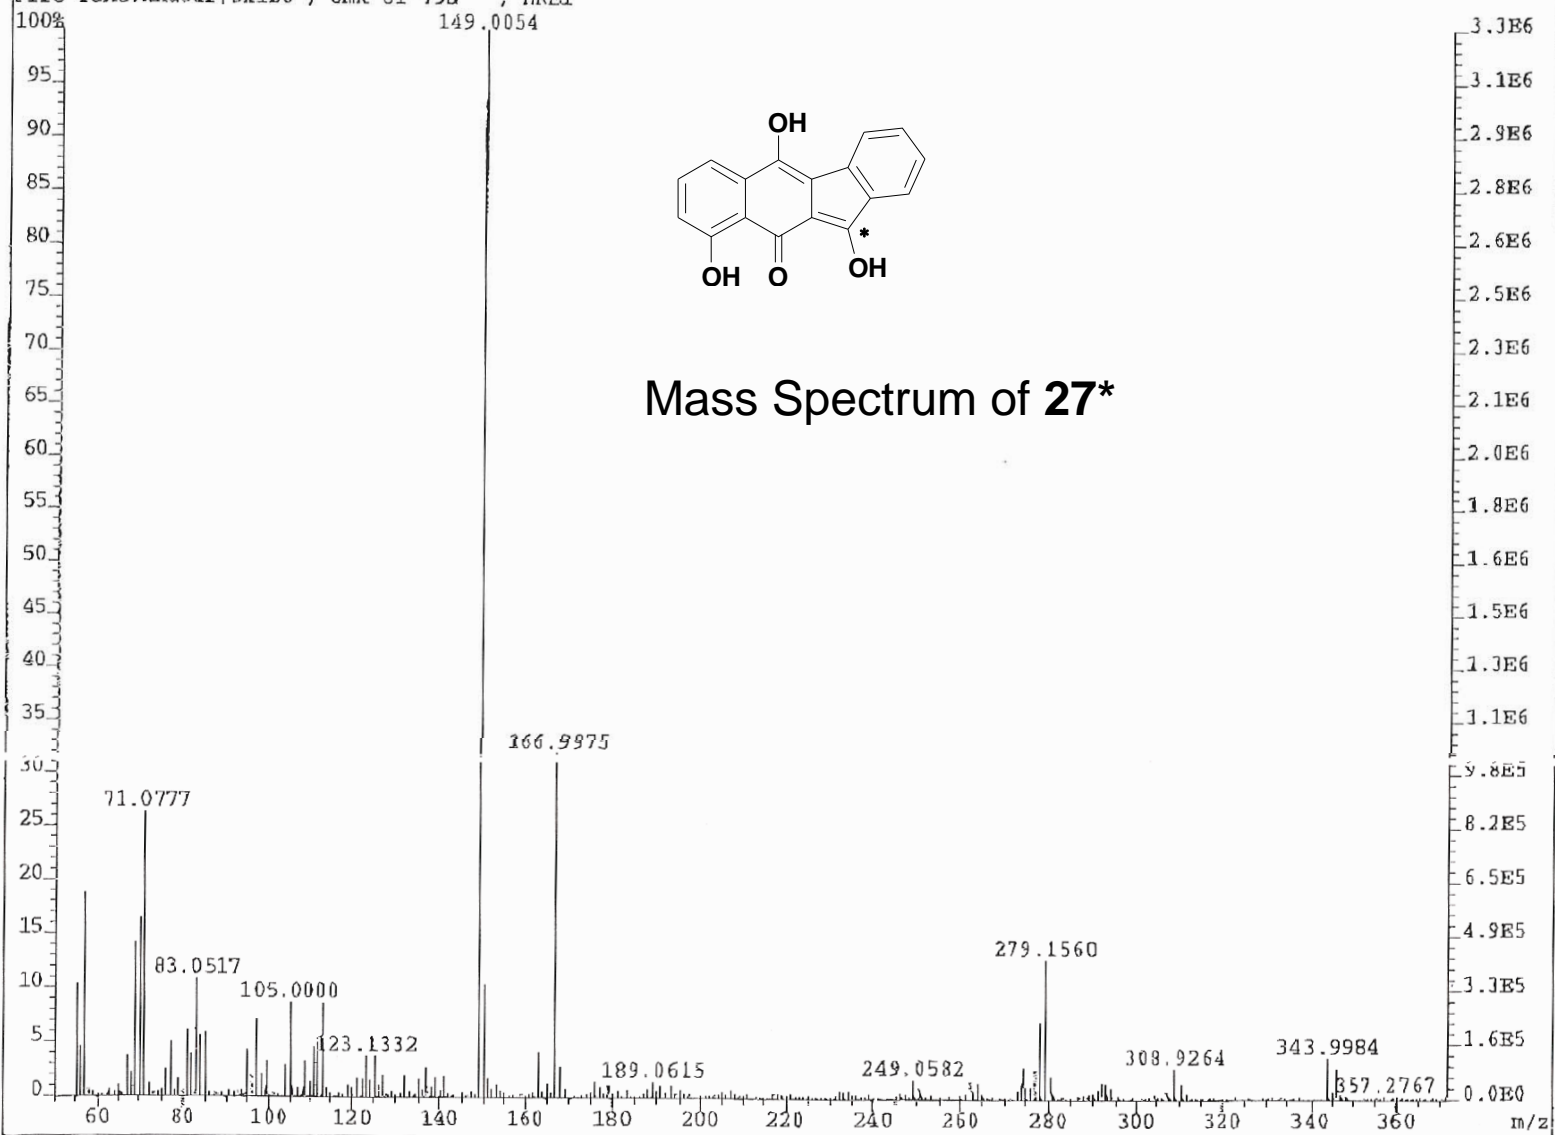

File:54126A Ident:26\_36-1\_11 Win 100PPM Acq:19-SEP-2006 09:04:21 +6:39 Cal:54126A  
AutoSpecEToFPPD RI+ Magnet EpM:57 BpL:682915 TIC:19668568 Flags:ACC  
File Text:Khdour/Skibo ; cmk-81-79x ; HREI

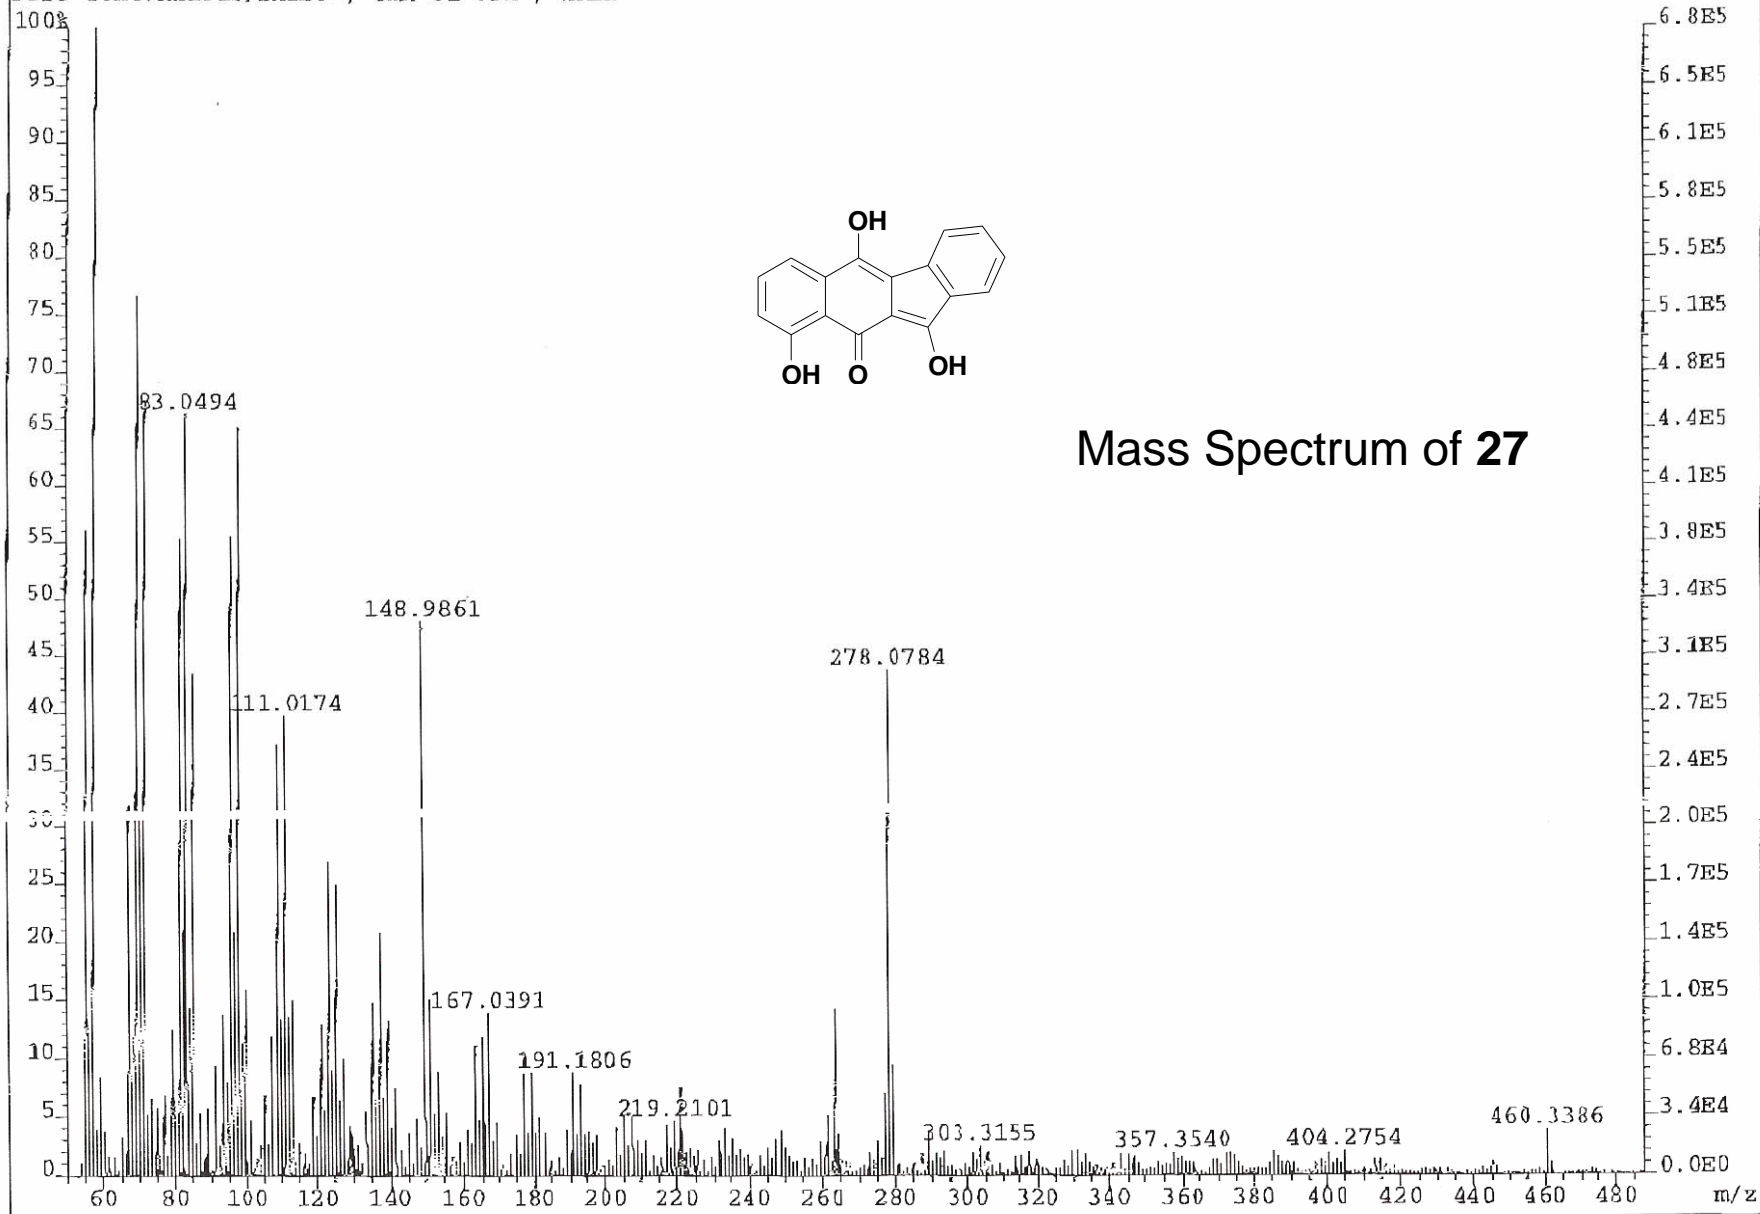

# H-NMR of Compound **12\*** obtained from **1\***

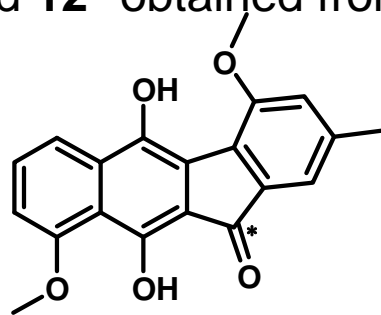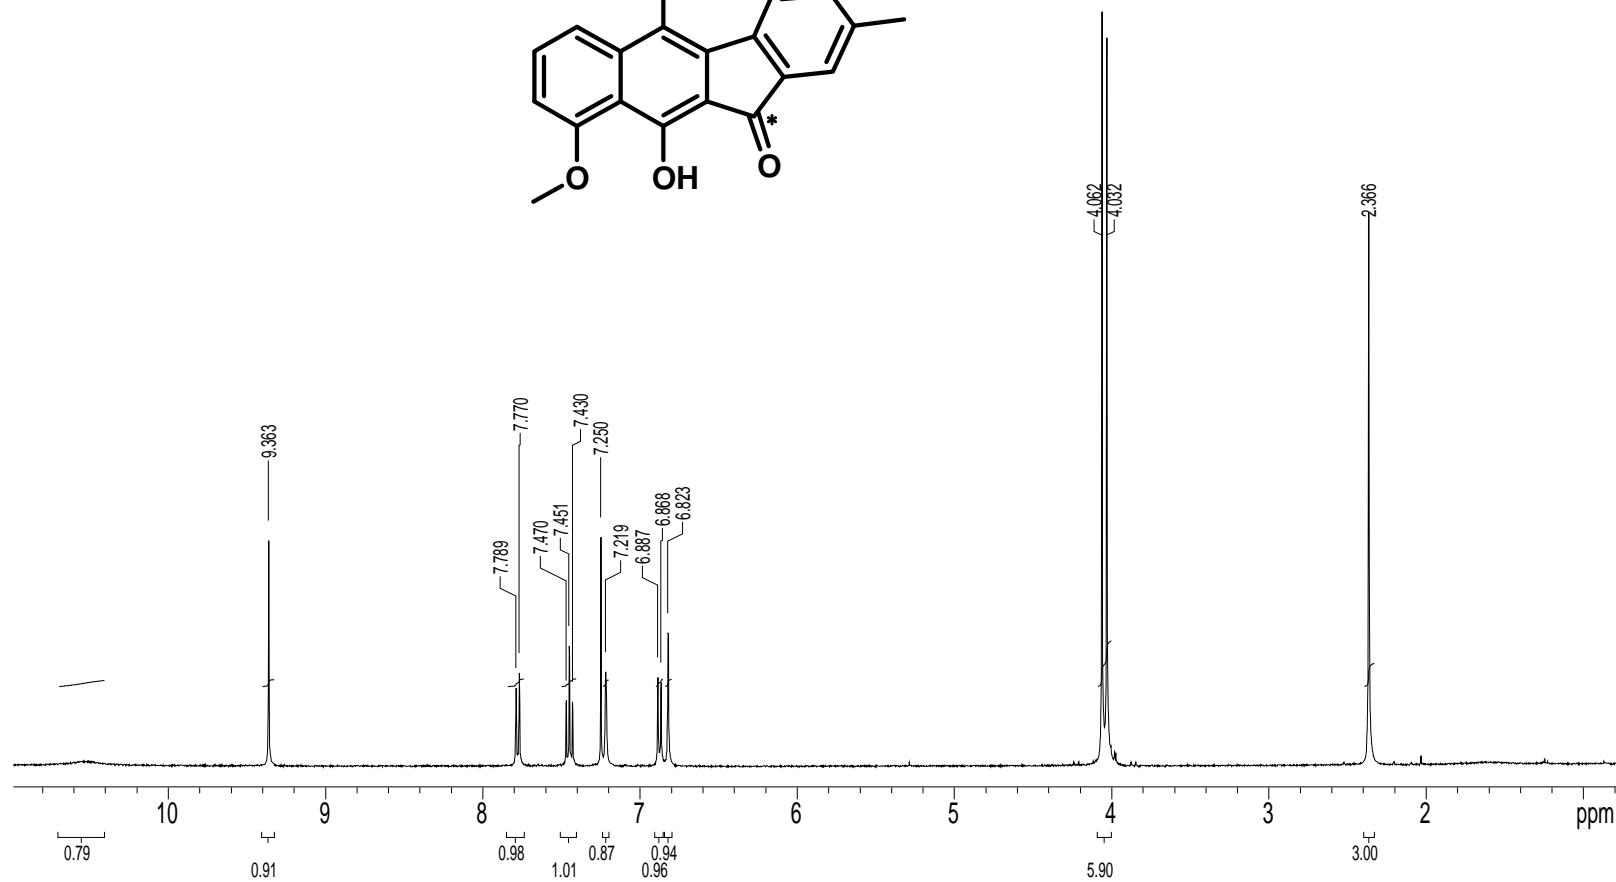

File:53933A Ident:30\_40-1\_10 Win 10UPPM Acq:18-MAY-2006 13:31:11 +7:33 Cal:53933A  
AutoSpecTTOFPPD EI+ Magnet BpM:337 BpI:82207 TIC:1144341 Flags:ACC  
File Text:Khdor/Skibo ; omk-k5 ; HFEI

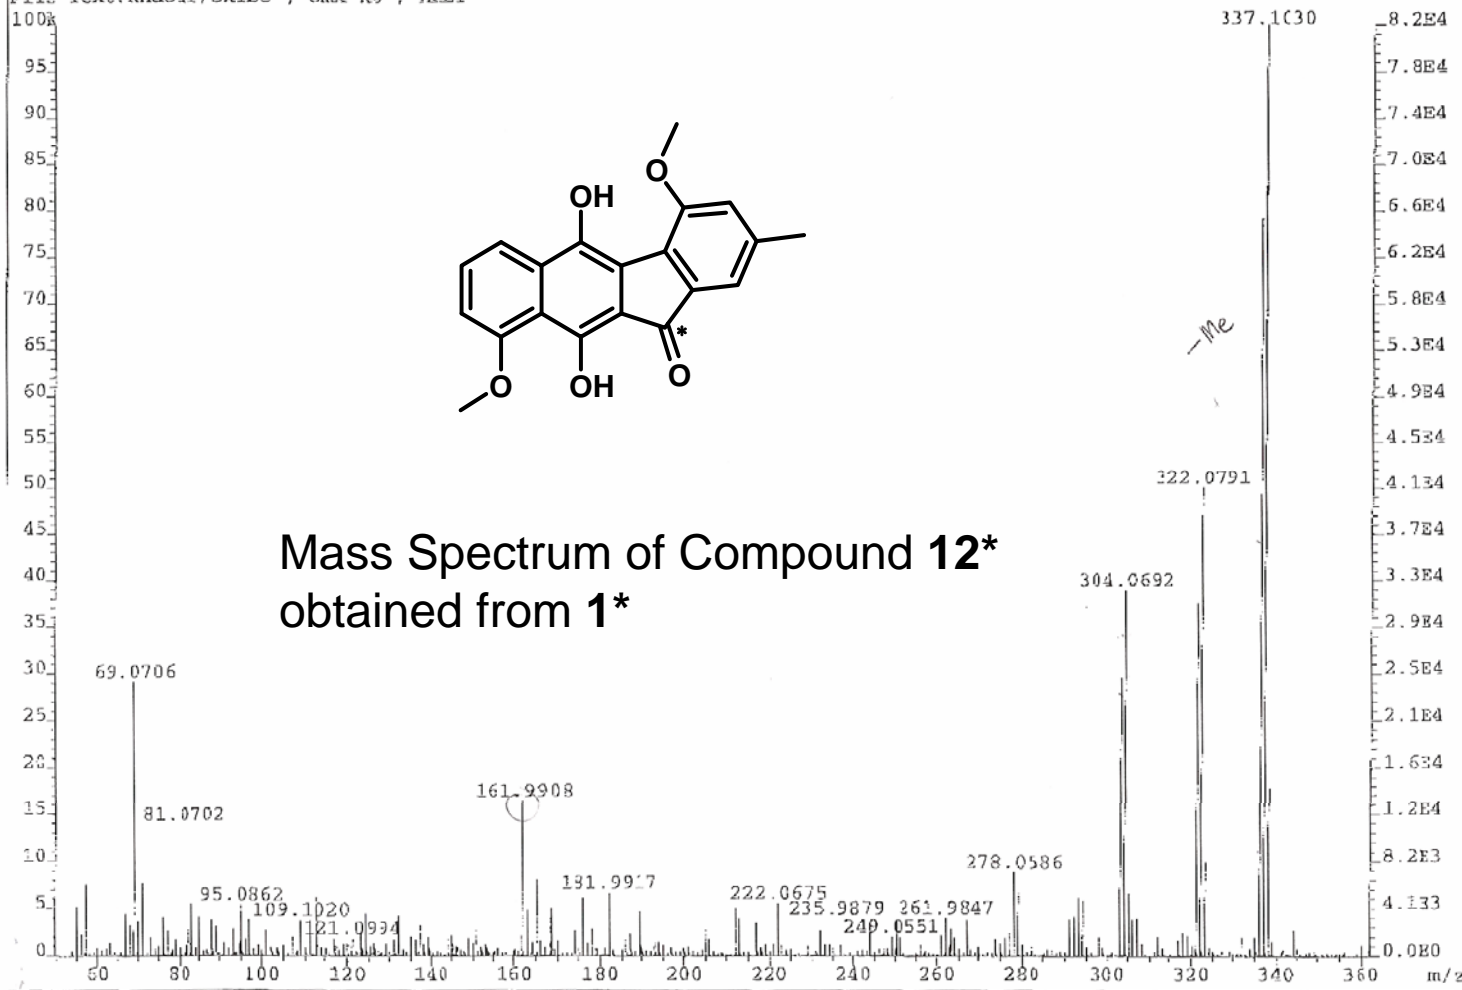

H-NMR of Compound **24\*** obtained from **1\***

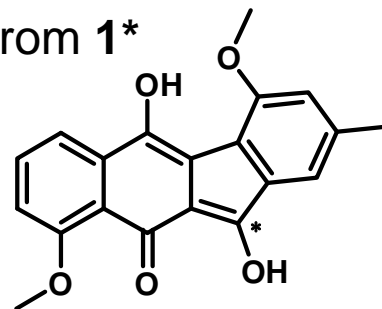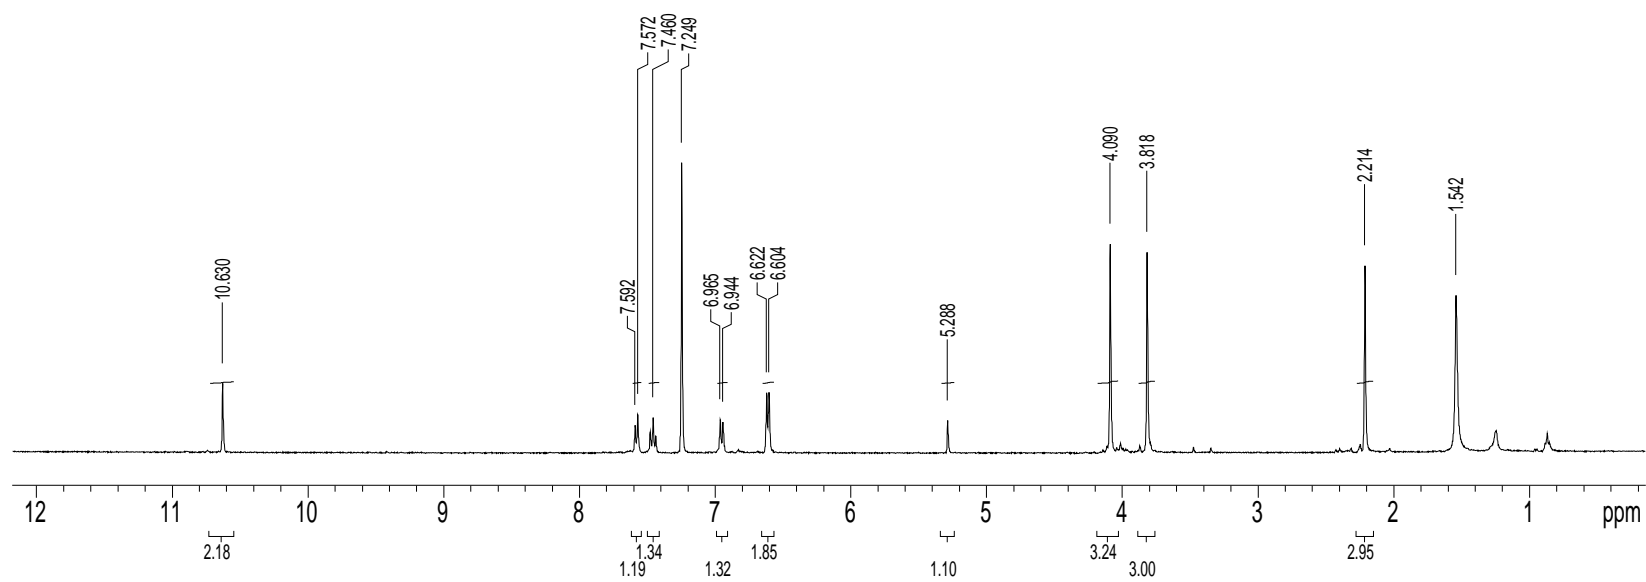



File:18821\_4B\_BG\_HRS Ident:1\_5 Win 100PPM Acq:20-OCT-2006 11:37:24 +6:02 Cal:18821\_4B\_BG\_HRS  
ZAB-SET EI+ Voltage BpM:343 BpI:6348800 TIC:33933152 Flags:ACC  
File Text:Khdour/Skibo\_OMK-81-90AC13\_in\_CH2Cl2 Created from 18821\_4\_BG\_HR 36 SMO(2,5) BSUB(4096,512,-3.0) PKD(5,3,5,0.01%,1068.0,0.00%,F>>

# Mass Spec of Compound 24\* obtained from 1\*

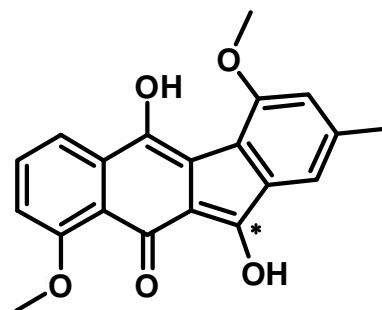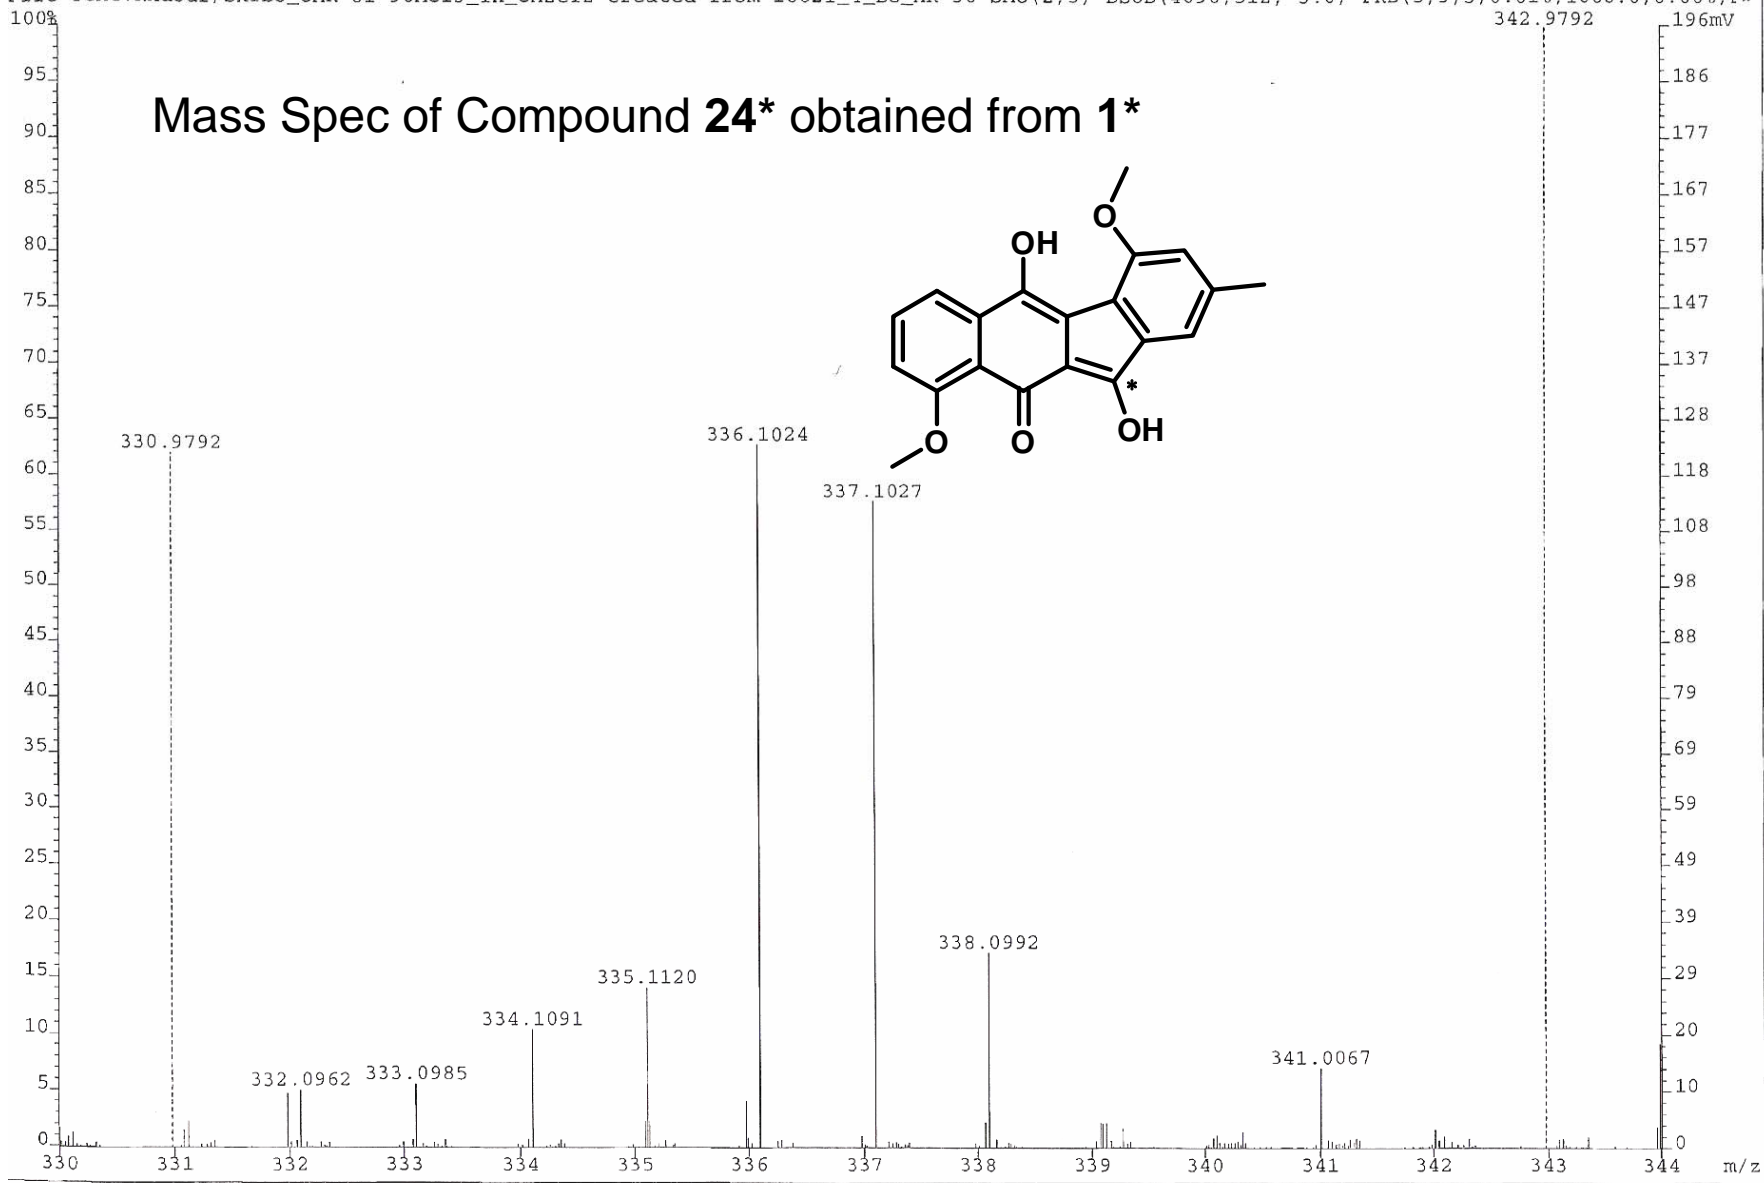

File:hd16 Ident:13\_23-1.8 Nam:JUDITH Acq:17-AUG-2006 09:18:23 P3:56 P01134116  
AutoSpock2008P1 M1+ Magnet OpM.12L Exp:770399 TIC:BSR9326 Flags:ACC  
File Text:Khadoyy/Skilo ; unk kin6 ; HRFI

# Mass Spectrum of 30\*

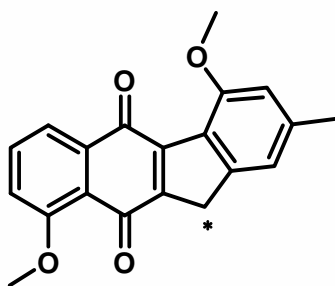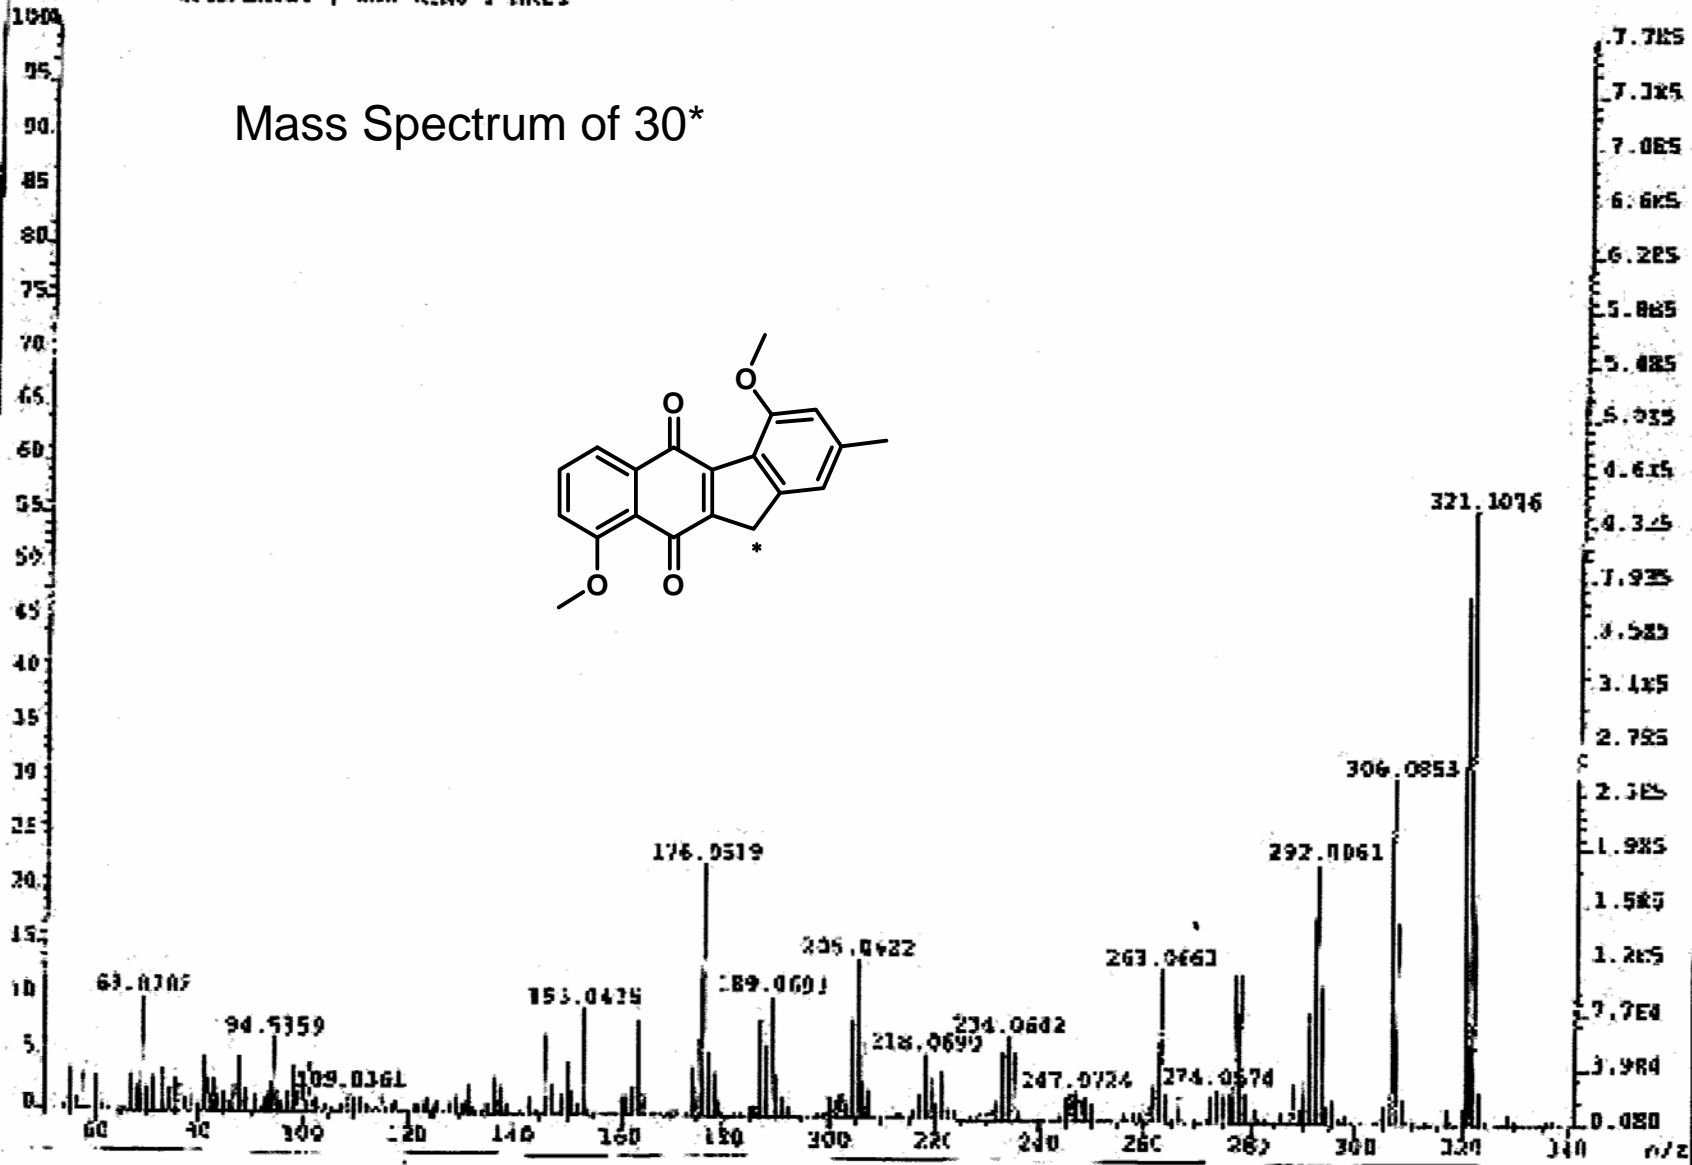

Prekinamycin Quinone Methide 27

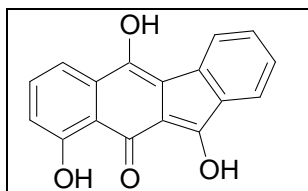

|   |           |           |           |
|---|-----------|-----------|-----------|
| C | 3.371766  | -0.620746 | 0.054317  |
| C | 2.683161  | 2.080986  | -0.058504 |
| C | 2.031178  | -0.241016 | 0.027342  |
| C | 4.361402  | 0.355701  | 0.027699  |
| C | 4.015247  | 1.682292  | -0.027738 |
| C | 1.687839  | 1.128814  | -0.029548 |
| H | 5.381557  | 0.037476  | 0.050494  |
| H | 4.785139  | 2.427645  | -0.048641 |
| H | 2.422210  | 3.114931  | -0.102599 |
| C | 0.991330  | -1.265343 | 0.052103  |
| C | 0.274200  | 1.549093  | -0.059128 |
| C | -0.686438 | 0.628459  | -0.016433 |
| C | -0.335731 | -0.778282 | 0.028106  |
| O | 1.233040  | -2.498139 | 0.092615  |
| O | 0.105145  | 2.902753  | -0.134465 |
| H | -0.790383 | 3.177780  | -0.354202 |
| O | 3.758107  | -1.913980 | 0.105262  |
| H | 2.985767  | -2.517072 | 0.116691  |
| C | -1.451257 | -1.544757 | 0.041231  |
| O | -1.514027 | -2.869444 | 0.076007  |
| H | -0.614115 | -3.257033 | 0.094842  |
| C | -2.622099 | -0.669891 | 0.015431  |
| C | -4.444648 | 1.370841  | 0.005151  |
| C | -3.960328 | -0.983983 | 0.028368  |
| C | -2.165631 | 0.663777  | -0.009427 |
| C | -3.091198 | 1.687029  | -0.005779 |
| C | -4.879319 | 0.054920  | 0.018600  |
| H | -4.276155 | -2.007370 | 0.048671  |
| H | -2.798420 | 2.717499  | 0.007506  |
| H | -5.928806 | -0.158428 | 0.027814  |
| H | -5.166064 | 2.163567  | 0.008006  |

Energy = -943.7702652 Hartrees

Compound **28** in Scheme 15.

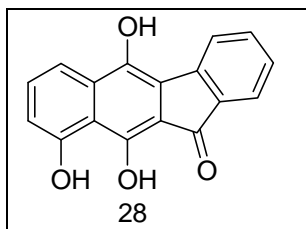

|   |           |           |           |
|---|-----------|-----------|-----------|
| C | 3.465461  | -0.831021 | -0.003063 |
| C | 2.746909  | 1.873052  | 0.081491  |
| C | 2.099322  | -0.469146 | 0.001468  |
| C | 4.424040  | 0.149493  | 0.030302  |
| C | 4.062639  | 1.491532  | 0.078691  |
| C | 1.741075  | 0.902849  | 0.032348  |
| H | 5.449660  | -0.151485 | 0.027394  |
| H | 4.831947  | 2.236737  | 0.121156  |
| H | 2.471938  | 2.903584  | 0.149137  |
| C | 1.051317  | -1.442137 | -0.014612 |
| C | 0.352679  | 1.293743  | 0.023252  |
| C | -0.589462 | 0.343819  | 0.019504  |
| C | -0.225818 | -1.028039 | 0.003459  |
| O | 1.371930  | -2.769367 | -0.045941 |
| O | 0.022970  | 2.645827  | 0.031287  |
| H | 0.185170  | 3.059194  | -0.831077 |
| O | 3.882761  | -2.122456 | -0.038148 |
| H | 3.146293  | -2.755770 | -0.050388 |
| C | -1.423493 | -1.868993 | -0.014273 |
| O | -1.429373 | -3.091434 | -0.041632 |
| C | -2.565015 | -0.912612 | 0.004348  |
| C | -4.297661 | 1.208833  | 0.075610  |
| C | -3.913278 | -1.167502 | 0.008750  |
| C | -2.068362 | 0.395494  | 0.030686  |
| C | -2.930005 | 1.466668  | 0.071329  |
| C | -4.787311 | -0.086478 | 0.042348  |
| H | -4.276488 | -2.175672 | -0.010612 |
| H | -2.545698 | 2.463353  | 0.112321  |
| H | -5.845221 | -0.255267 | 0.047192  |
| H | -4.985738 | 2.030226  | 0.109047  |
| H | 0.576812  | -3.337026 | -0.051374 |

Energy = -943.7837005 Hartrees

Protonated Prekinamycin Quinone Methide **26H<sup>+</sup>**.

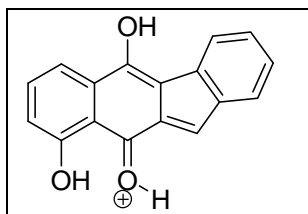

|   | X         | Y         | Z        |
|---|-----------|-----------|----------|
| H | -2.163589 | -3.077974 | 0.000000 |
| C | -2.480750 | -2.059260 | 0.000000 |
| C | -3.309659 | 0.587608  | 0.000000 |
| C | -1.532438 | -1.056275 | 0.000000 |
| C | -3.826973 | -1.736033 | 0.000000 |
| C | -4.246106 | -0.419026 | 0.000000 |
| C | -1.941541 | 0.296438  | 0.000000 |
| H | -4.557464 | -2.518905 | 0.000000 |
| H | -5.290935 | -0.183685 | 0.000000 |
| C | -0.102605 | -1.406903 | 0.000000 |
| O | 0.111388  | -2.740773 | 0.000000 |
| H | 1.030499  | -3.026976 | 0.000000 |
| C | 0.805928  | -0.430370 | 0.000000 |
| C | 0.385890  | 0.963131  | 0.000000 |
| C | -0.950353 | 1.340549  | 0.000000 |
| O | -1.249620 | 2.613867  | 0.000000 |
| H | -2.215992 | 2.800001  | 0.000000 |
| O | -3.656082 | 1.918448  | 0.000000 |
| H | -4.604151 | 2.106849  | 0.000000 |
| C | 1.488512  | 1.781367  | 0.000000 |
| H | 1.464185  | 2.850461  | 0.000000 |
| C | 2.280732  | -0.396697 | 0.000000 |
| C | 4.965183  | 0.345687  | 0.000000 |
| C | 3.249145  | -1.375118 | 0.000000 |
| C | 2.669451  | 0.966382  | 0.000000 |
| C | 4.005210  | 1.338761  | 0.000000 |
| C | 4.586248  | -0.990854 | 0.000000 |
| H | 3.014173  | -2.419400 | 0.000000 |
| H | 4.285626  | 2.373116  | 0.000000 |
| H | 5.344080  | -1.748210 | 0.000000 |
| H | 6.004036  | 0.602264  | 0.000000 |

Energy = -869.6815298 Hartrees

Prekinamycin Quinone Methide **26**.

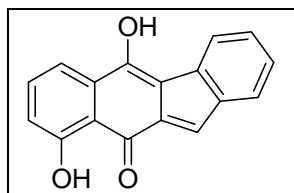

|   | X         | Y         | Z        |
|---|-----------|-----------|----------|
| H | -2.160903 | -3.036927 | 0.000000 |
| C | -2.487627 | -2.021006 | 0.000000 |
| C | -3.339392 | 0.631934  | 0.000000 |
| C | -1.560034 | -1.007300 | 0.000000 |
| C | -3.845938 | -1.708378 | 0.000000 |
| C | -4.269166 | -0.407636 | 0.000000 |
| C | -1.979407 | 0.338855  | 0.000000 |
| H | -4.566842 | -2.501226 | 0.000000 |
| H | -5.306059 | -0.148103 | 0.000000 |
| C | -0.121709 | -1.338795 | 0.000000 |
| O | 0.120244  | -2.675464 | 0.000000 |
| H | 1.051393  | -2.915325 | 0.000000 |
| C | 0.793474  | -0.369938 | 0.000000 |
| C | -1.004008 | 1.439321  | 0.000000 |
| O | -1.347341 | 2.624999  | 0.000000 |
| O | -3.822383 | 1.892828  | 0.000000 |
| H | -3.100777 | 2.553232  | 0.000000 |
| C | 0.390423  | 1.035495  | 0.000000 |
| C | 2.266668  | -0.360061 | 0.000000 |
| C | 4.956338  | 0.331840  | 0.000000 |
| C | 3.226860  | -1.354122 | 0.000000 |
| C | 2.669084  | 0.992935  | 0.000000 |
| C | 4.004891  | 1.338837  | 0.000000 |
| C | 4.568128  | -0.999042 | 0.000000 |
| H | 2.973747  | -2.395749 | 0.000000 |
| H | 4.301460  | 2.369102  | 0.000000 |
| H | 5.314934  | -1.767843 | 0.000000 |
| H | 5.998332  | 0.580914  | 0.000000 |
| C | 1.468601  | 1.831464  | 0.000000 |
| H | 1.455549  | 2.899487  | 0.000000 |

Energy = -869.3069255 Hartrees

Quinone Methide **31** in Scheme 16.

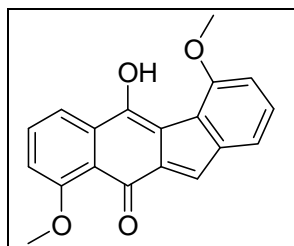

|   | X         | Y         | Z         |
|---|-----------|-----------|-----------|
| H | -1.946575 | -3.219056 | -0.019679 |
| C | -2.479865 | -2.295131 | -0.012677 |
| C | -3.826640 | 0.138155  | 0.005533  |
| C | -1.767555 | -1.108769 | -0.005396 |
| C | -3.858241 | -2.263089 | -0.010829 |
| C | -4.527623 | -1.060742 | -0.001922 |
| C | -2.428063 | 0.131281  | 0.004022  |
| H | -4.413909 | -3.179527 | -0.016425 |
| H | -5.595982 | -1.054558 | -0.000747 |
| C | -0.290029 | -1.201788 | -0.008180 |
| O | 0.188920  | -2.456298 | -0.017848 |
| H | 1.173385  | -2.479910 | -0.019793 |
| C | 0.446550  | -0.088556 | -0.001429 |
| C | -1.642307 | 1.404599  | 0.012207  |
| O | -2.122364 | 2.522206  | 0.020892  |
| C | -0.184720 | 1.220160  | 0.008996  |
| C | 0.745796  | 2.185741  | 0.014839  |
| H | 0.557654  | 3.236486  | 0.022783  |
| C | 1.887676  | 0.165929  | -0.001896 |
| C | 4.439431  | 1.282137  | 0.002302  |
| C | 2.997439  | -0.660955 | -0.009703 |
| C | 2.069904  | 1.557017  | 0.008165  |
| C | 3.338145  | 2.115743  | 0.010497  |
| C | 4.258880  | -0.102589 | -0.007574 |
| H | 3.463414  | 3.180370  | 0.018485  |
| H | 5.125556  | -0.730495 | -0.013424 |
| O | 2.774580  | -2.030898 | -0.019306 |
| O | -4.460915 | 1.336369  | 0.014168  |
| C | 3.873074  | -2.968003 | -0.027137 |
| H | 4.478642  | -2.837382 | -0.912864 |
| H | 3.419749  | -3.945382 | -0.033300 |
| H | 4.480758  | -2.849690 | 0.858840  |
| C | -5.893286 | 1.447953  | 0.015475  |
| H | -6.324980 | 1.002069  | -0.871863 |
| H | -6.088478 | 2.506707  | 0.022616  |
| H | -6.324330 | 0.990415  | 0.897131  |
| C | 5.849693  | 1.841945  | 0.001071  |
| H | 6.378984  | 1.544172  | -0.897565 |
| H | 6.407449  | 1.480617  | 0.858615  |
| H | 5.836280  | 2.923795  | 0.039966  |

Energy = -1060.1888746 Hartrees

Keto form **30** in Scheme 16

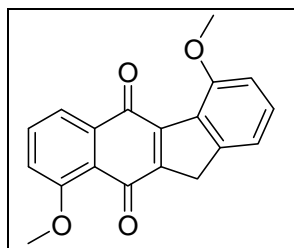

|   | X         | Y         | Z         |
|---|-----------|-----------|-----------|
| H | -2.099592 | -3.253551 | 0.025004  |
| C | -2.601820 | -2.310679 | 0.021130  |
| C | -3.852841 | 0.170945  | 0.011177  |
| C | -1.846144 | -1.154692 | 0.016161  |
| C | -3.977847 | -2.227346 | 0.021000  |
| C | -4.599615 | -0.997996 | 0.016108  |
| C | -2.455832 | 0.099525  | 0.011019  |
| H | -4.569526 | -3.120798 | 0.024728  |
| H | -5.667052 | -0.949918 | 0.016125  |
| C | -0.348070 | -1.347599 | 0.016734  |
| C | -1.609619 | 1.318636  | 0.005430  |
| O | 0.103055  | -2.471961 | 0.022142  |
| O | -2.014304 | 2.465469  | 0.000740  |
| O | -4.429422 | 1.397687  | 0.006310  |
| C | -5.856292 | 1.574716  | 0.007086  |
| H | -6.307545 | 1.139267  | -0.875597 |
| H | -6.003522 | 2.641163  | 0.003319  |
| H | -6.305774 | 1.145922  | 0.893875  |
| C | 0.454147  | -0.106583 | 0.010631  |
| C | -0.159915 | 1.076298  | 0.005470  |
| C | 1.921458  | 0.110887  | 0.008792  |
| C | 4.499882  | 1.164379  | 0.000484  |
| C | 3.012626  | -0.754419 | 0.011333  |
| C | 2.145080  | 1.486738  | 0.002014  |
| C | 3.414657  | 2.023415  | -0.002564 |
| C | 4.285583  | -0.208479 | 0.006928  |
| H | 3.560085  | 3.085584  | -0.008669 |
| H | 5.136633  | -0.857376 | 0.008015  |
| C | 0.820072  | 2.216760  | -0.000585 |
| H | 0.695185  | 2.834476  | -0.883360 |
| H | 0.696252  | 2.842844  | 0.876441  |
| O | 2.777050  | -2.089869 | 0.017340  |
| C | 3.839581  | -3.055070 | 0.016789  |
| H | 4.455216  | -2.963394 | -0.869598 |
| H | 3.345916  | -4.011925 | 0.021140  |
| H | 4.460898  | -2.958378 | 0.898629  |
| C | 5.920122  | 1.695953  | 0.006489  |
| H | 6.495257  | 1.262725  | -0.804680 |
| H | 6.413244  | 1.448342  | 0.940816  |
| H | 5.932668  | 2.772306  | -0.106864 |

Energy = -1060.1765447 Hartrees



Keto form **32** in Scheme 16.

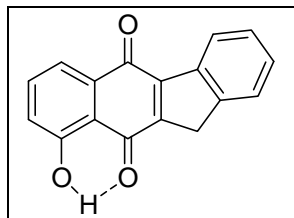

|   | X         | Y         | Z         |
|---|-----------|-----------|-----------|
| H | -2.208783 | -3.058068 | 0.000000  |
| C | -2.535168 | -2.039685 | 0.000000  |
| C | -3.353036 | 0.623044  | 0.000000  |
| C | -1.602760 | -1.037446 | 0.000000  |
| C | -3.892329 | -1.715137 | 0.000000  |
| C | -4.294680 | -0.408225 | 0.000000  |
| C | -1.999640 | 0.310368  | 0.000000  |
| H | -4.624102 | -2.497522 | 0.000000  |
| H | -5.327982 | -0.134274 | 0.000000  |
| C | -0.158425 | -1.415566 | 0.000000  |
| C | -1.003644 | 1.393678  | 0.000000  |
| O | 0.207489  | -2.575344 | 0.000000  |
| O | -1.318700 | 2.583130  | 0.000000  |
| C | 0.788837  | -0.289397 | 0.000000  |
| C | 0.396258  | 0.982514  | 0.000000  |
| C | 2.253391  | -0.362474 | 0.000000  |
| C | 4.960506  | 0.089642  | 0.000000  |
| C | 3.105416  | -1.449199 | 0.000000  |
| C | 2.742779  | 0.947034  | 0.000000  |
| C | 4.098988  | 1.179670  | 0.000000  |
| C | 4.470120  | -1.207726 | 0.000000  |
| H | 2.708041  | -2.441548 | 0.000000  |
| H | 4.488673  | 2.178509  | 0.000000  |
| H | 5.154242  | -2.032464 | 0.000000  |
| H | 6.019691  | 0.254148  | 0.000000  |
| C | 1.577224  | 1.925390  | 0.000000  |
| H | 1.572696  | 2.557878  | -0.881335 |
| H | 1.572696  | 2.557878  | 0.881335  |
| O | -3.826819 | 1.888538  | 0.000000  |
| H | -3.107082 | 2.547191  | 0.000000  |

Energy = -869.3227535 Hartrees

Quinone methide form **33** in Scheme 16

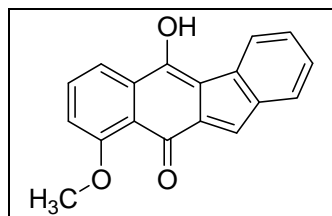

|   | X         | Y         | Z         |
|---|-----------|-----------|-----------|
| H | -1.516542 | -3.304958 | -0.013585 |
| C | -1.965875 | -2.337642 | -0.005857 |
| C | -3.106033 | 0.199676  | 0.013446  |
| C | -1.156682 | -1.214192 | -0.011059 |
| C | -3.336507 | -2.190255 | 0.011370  |
| C | -3.903937 | -0.936771 | 0.021528  |
| C | -1.712471 | 0.076864  | -0.003741 |
| H | -3.965931 | -3.057561 | 0.017022  |
| H | -4.967925 | -0.842110 | 0.035086  |
| C | 0.306863  | -1.420172 | -0.021340 |
| O | 0.667591  | -2.733369 | -0.055045 |
| H | 1.604730  | -2.880705 | -0.214775 |
| C | 1.136665  | -0.382896 | -0.001995 |
| C | -0.825688 | 1.280903  | -0.020318 |
| O | -1.211453 | 2.434515  | -0.036832 |
| C | 0.610429  | 0.977787  | -0.016158 |
| C | 1.614441  | 1.862330  | -0.032767 |
| H | 1.508065  | 2.924640  | -0.051384 |
| O | -3.637408 | 1.445633  | 0.022622  |
| C | -5.055743 | 1.678241  | 0.039150  |
| H | -5.533249 | 1.265980  | -0.840780 |
| H | -5.159982 | 2.749656  | 0.042020  |
| H | -5.513119 | 1.263124  | 0.928386  |
| C | 2.604050  | -0.250893 | 0.012354  |
| C | 5.222264  | 0.663159  | 0.024347  |
| C | 3.641721  | -1.160535 | 0.063744  |
| C | 2.887296  | 1.131247  | -0.016886 |
| C | 4.188564  | 1.587262  | -0.013133 |
| C | 4.949797  | -0.694524 | 0.066071  |
| H | 3.472490  | -2.217701 | 0.121815  |
| H | 4.398520  | 2.638360  | -0.035347 |
| H | 5.758593  | -1.396710 | 0.105904  |
| H | 6.239313  | 1.000553  | 0.027731  |

Energy = -908.0936127 Hartrees

Keto form **34** in Scheme 16.

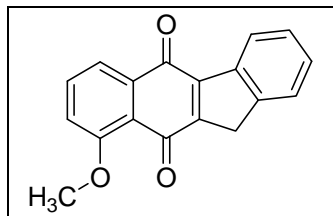

|   | X         | Y         | Z         |
|---|-----------|-----------|-----------|
| H | -1.568284 | -3.329068 | 0.000000  |
| C | -2.016227 | -2.358519 | 0.000000  |
| C | -3.118369 | 0.195248  | 0.000000  |
| C | -1.198073 | -1.248383 | 0.000000  |
| C | -3.386365 | -2.194950 | 0.000000  |
| C | -3.931554 | -0.931344 | 0.000000  |
| C | -1.728460 | 0.046561  | 0.000000  |
| H | -4.030206 | -3.051315 | 0.000000  |
| H | -4.994145 | -0.819652 | 0.000000  |
| C | 0.277640  | -1.507283 | 0.000000  |
| C | -0.817736 | 1.229812  | 0.000000  |
| O | 0.726863  | -2.638456 | 0.000000  |
| O | -1.168266 | 2.393002  | 0.000000  |
| C | 1.125300  | -0.317207 | 0.000000  |
| C | 0.619498  | 0.910464  | 0.000000  |
| C | 2.592312  | -0.261742 | 0.000000  |
| C | 5.249303  | 0.430009  | 0.000000  |
| C | 3.537362  | -1.267224 | 0.000000  |
| C | 2.962938  | 1.086041  | 0.000000  |
| C | 4.292775  | 1.438495  | 0.000000  |
| C | 4.876109  | -0.905088 | 0.000000  |
| H | 3.229575  | -2.291112 | 0.000000  |
| H | 4.591575  | 2.468342  | 0.000000  |
| H | 5.630772  | -1.666070 | 0.000000  |
| H | 6.289588  | 0.688707  | 0.000000  |
| C | 1.712747  | 1.954342  | 0.000000  |
| H | 1.648364  | 2.584410  | -0.880573 |
| H | 1.648364  | 2.584410  | 0.880573  |
| O | -3.627135 | 1.450457  | 0.000000  |
| C | -5.042274 | 1.708726  | 0.000000  |
| H | -5.515940 | 1.303011  | -0.884821 |
| H | -5.127596 | 2.781702  | 0.000000  |
| H | -5.515940 | 1.303011  | 0.884821  |

Energy = -908.1125796 Hartrees

Quinone Methide form **35** in Scheme 16.

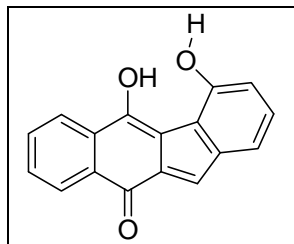

|   | X         | Y         | Z         |
|---|-----------|-----------|-----------|
| H | 2.800091  | -2.416260 | -0.153524 |
| C | 3.012732  | -1.369795 | -0.082655 |
| C | 3.573289  | 1.335868  | -0.004520 |
| C | 1.968755  | -0.459300 | -0.009023 |
| C | 4.324059  | -0.930719 | -0.102138 |
| C | 4.609344  | 0.422081  | -0.055513 |
| C | 2.259302  | 0.909578  | 0.013662  |
| H | 5.119977  | -1.646043 | -0.161409 |
| H | 5.625370  | 0.760824  | -0.069629 |
| H | 3.763356  | 2.389333  | 0.015806  |
| C | 0.573411  | -0.921883 | 0.024377  |
| C | -0.433818 | -0.061946 | 0.001024  |
| C | -0.175119 | 1.386065  | 0.004761  |
| C | 1.176847  | 1.933346  | 0.032883  |
| O | 1.419627  | 3.128181  | 0.062785  |
| O | 0.351587  | -2.301446 | 0.068191  |
| H | 0.737455  | -2.711284 | 0.857893  |
| C | -1.332473 | 2.055040  | 0.026445  |
| H | -1.437909 | 3.118082  | 0.054686  |
| C | -1.900221 | -0.207690 | -0.010829 |
| C | -4.633715 | 0.187491  | -0.023794 |
| C | -2.730001 | -1.306882 | -0.064886 |
| C | -2.447801 | 1.093142  | 0.013800  |
| C | -3.801667 | 1.307343  | 0.010934  |
| C | -4.110934 | -1.082740 | -0.063752 |
| H | -4.209962 | 2.297448  | 0.029988  |
| H | -4.747189 | -1.941736 | -0.101447 |
| H | -5.697539 | 0.317350  | -0.027041 |
| O | -2.313450 | -2.596759 | -0.126868 |
| H | -1.343404 | -2.686686 | -0.160209 |

Energy = -869.3031735 Hartrees

Keto form **36** in Scheme 16.

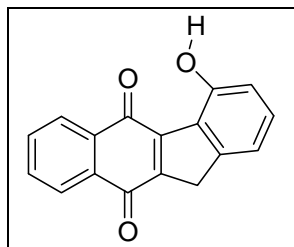

|   | X         | Y         | Z         |
|---|-----------|-----------|-----------|
| H | 2.919267  | -2.560710 | -0.000612 |
| C | 3.136140  | -1.512725 | -0.000648 |
| C | 3.646754  | 1.209422  | -0.000585 |
| C | 2.086910  | -0.612888 | 0.000720  |
| C | 4.441497  | -1.053233 | -0.002134 |
| C | 4.696231  | 0.306317  | -0.002100 |
| C | 2.344132  | 0.754647  | 0.000745  |
| H | 5.252636  | -1.752903 | -0.003371 |
| H | 5.706328  | 0.663449  | -0.003295 |
| H | 3.823668  | 2.265115  | -0.000497 |
| C | 0.698368  | -1.138449 | 0.001941  |
| C | 1.231988  | 1.743203  | 0.001984  |
| O | 0.481432  | -2.342623 | 0.002793  |
| O | 1.430564  | 2.943588  | 0.002579  |
| C | -0.381019 | -0.134859 | 0.001725  |
| C | -0.114691 | 1.172271  | 0.001911  |
| C | -1.378253 | 1.990687  | 0.001710  |
| H | -1.435930 | 2.620852  | 0.883153  |
| H | -1.434906 | 2.622466  | -0.878597 |
| C | -1.839987 | -0.353951 | 0.000886  |
| C | -4.585652 | -0.100468 | -0.002213 |
| C | -2.618075 | -1.503982 | 0.000143  |
| C | -2.448236 | 0.913188  | 0.000472  |
| C | -3.810226 | 1.056935  | -0.000968 |
| C | -4.002975 | -1.345960 | -0.001690 |
| H | -4.267982 | 2.025608  | -0.001221 |
| H | -4.596177 | -2.235736 | -0.002611 |
| H | -5.654790 | -0.022321 | -0.003617 |
| O | -2.150188 | -2.775080 | 0.001235  |
| H | -1.176828 | -2.841861 | 0.002162  |

Energy = -869.3222170 Hartrees

Quinone Methide form **37** in Scheme 16.

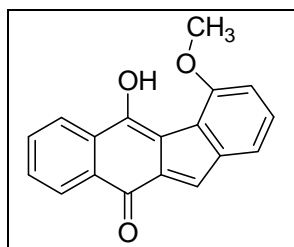

|   | X         | Y         | Z         |
|---|-----------|-----------|-----------|
| H | 2.636923  | -2.647655 | 0.000000  |
| C | 3.085632  | -1.677989 | 0.000000  |
| C | 4.214249  | 0.848759  | 0.000000  |
| C | 2.266478  | -0.560880 | 0.000000  |
| C | 4.461100  | -1.530863 | 0.000000  |
| C | 5.028338  | -0.269171 | 0.000000  |
| C | 2.839842  | 0.713266  | 0.000000  |
| H | 5.086626  | -2.401116 | 0.000000  |
| H | 6.093834  | -0.156478 | 0.000000  |
| H | 4.627353  | 1.836321  | 0.000000  |
| C | 0.800251  | -0.732673 | 0.000000  |
| C | 0.007347  | 0.348429  | 0.000000  |
| C | 0.561105  | 1.697704  | 0.000000  |
| C | 2.000122  | 1.945631  | 0.000000  |
| O | 2.493983  | 3.060294  | 0.000000  |
| C | -0.424842 | 2.607765  | 0.000000  |
| H | -0.300381 | 3.668431  | 0.000000  |
| O | 0.390116  | -2.007580 | 0.000000  |
| H | -0.592351 | -2.087863 | 0.000000  |
| C | -1.445381 | 0.522444  | 0.000000  |
| C | -4.042998 | 1.481938  | 0.000000  |
| C | -2.503988 | -0.371205 | 0.000000  |
| C | -1.707231 | 1.904341  | 0.000000  |
| C | -3.005283 | 2.389311  | 0.000000  |
| C | -3.797134 | 0.111994  | 0.000000  |
| H | -3.196249 | 3.443587  | 0.000000  |
| H | -4.627498 | -0.561490 | 0.000000  |
| H | -5.057627 | 1.826331  | 0.000000  |
| O | -2.201222 | -1.726281 | 0.000000  |
| C | -3.244017 | -2.726253 | 0.000000  |
| H | -3.856400 | -2.636853 | 0.886049  |
| H | -2.734297 | -3.675343 | 0.000000  |
| H | -3.856400 | -2.636853 | -0.886049 |

Energy = -908.1263857 Hartrees

Quinone Methide form **38** in Scheme 16.

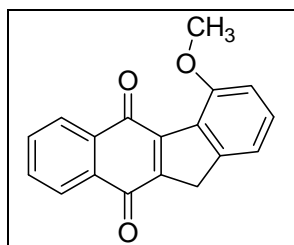

|   | X         | Y         | Z         |
|---|-----------|-----------|-----------|
| H | 2.834687  | -2.583180 | -0.249271 |
| C | 3.181382  | -1.573814 | -0.171534 |
| C | 4.031486  | 1.050520  | 0.048801  |
| C | 2.250484  | -0.556156 | -0.071379 |
| C | 4.532934  | -1.281135 | -0.170857 |
| C | 4.959186  | 0.031450  | -0.060433 |
| C | 2.680497  | 0.759717  | 0.040284  |
| H | 5.249439  | -2.073484 | -0.254207 |
| H | 6.006261  | 0.258735  | -0.057429 |
| H | 4.336999  | 2.072358  | 0.141647  |
| C | 0.799449  | -0.922339 | -0.063774 |
| C | 1.701563  | 1.866429  | 0.163171  |
| O | 0.463626  | -2.087914 | -0.025615 |
| O | 2.038921  | 3.027854  | 0.304033  |
| C | -0.146329 | 0.220537  | -0.063947 |
| C | 0.294587  | 1.472079  | 0.082938  |
| C | -0.833890 | 2.463841  | 0.148575  |
| H | -0.834875 | 2.987980  | 1.098825  |
| H | -0.762296 | 3.196111  | -0.648717 |
| C | -1.625146 | 0.232600  | -0.156938 |
| C | -4.306647 | 0.915211  | -0.272174 |
| C | -2.566653 | -0.755493 | -0.397077 |
| C | -2.041449 | 1.565076  | -0.015910 |
| C | -3.368475 | 1.915672  | -0.061407 |
| C | -3.905944 | -0.394571 | -0.442201 |
| H | -3.672224 | 2.937426  | 0.050825  |
| H | -4.626248 | -1.161151 | -0.641181 |
| H | -5.348827 | 1.161022  | -0.319254 |
| O | -2.223072 | -2.064790 | -0.636648 |
| C | -2.271338 | -2.992449 | 0.483492  |
| H | -1.615549 | -2.669244 | 1.274992  |
| H | -1.927305 | -3.933738 | 0.091157  |
| H | -3.285234 | -3.085162 | 0.851215  |

Energy = -908.1135495 Hartrees
